# Supplementary material for: Infant BMI peak as a predictor of overweight and obesity at age 2 years in a Chinese community-based cohort
Source: PubMed Central journal article supplement — BMJ Open. 2017 Oct 6;7(10):e015122. doi: 10.1136/bmjopen-2016-015122 (PMC5640041; doi:10.1136/bmjopen-2016-015122), 2017-10-06
Supplement: bmjopen-2016-015122.draft_revisions.pdf [file bmjopen-2016-015122.draft_revisions.pdf]

# BMJ Open

BMJ Open is committed to open peer review. As part of this commitment we make the peer review history of every article we publish publicly available.

When an article is published we post the peer reviewers' comments and the authors' responses online. We also post the versions of the paper that were used during peer review. These are the versions that the peer review comments apply to.

The versions of the paper that follow are the versions that were submitted during the peer review process. They are not the versions of record or the final published versions. They should not be cited or distributed as the published version of this manuscript.

BMJ Open is an open access journal and the full, final, typeset and author-corrected version of record of the manuscript is available on our site with no access controls, subscription charges or pay-per-view fees (<http://bmjopen.bmj.com>).

If you have any questions on BMJ Open's open peer review process please email [editorial.bmjopen@bmj.com](mailto:editorial.bmjopen@bmj.com)

# BMJ Open

## Characterization of Infant BMI peak in urban China

|                                 |                                                                                                                                                                                                                                                                                                                                                                                                                                                                                                                                                                                                                                                                                                                                                                                                                 |
|---------------------------------|-----------------------------------------------------------------------------------------------------------------------------------------------------------------------------------------------------------------------------------------------------------------------------------------------------------------------------------------------------------------------------------------------------------------------------------------------------------------------------------------------------------------------------------------------------------------------------------------------------------------------------------------------------------------------------------------------------------------------------------------------------------------------------------------------------------------|
| Journal:                        | <i>BMJ Open</i>                                                                                                                                                                                                                                                                                                                                                                                                                                                                                                                                                                                                                                                                                                                                                                                                 |
| Manuscript ID                   | bmjopen-2016-015122                                                                                                                                                                                                                                                                                                                                                                                                                                                                                                                                                                                                                                                                                                                                                                                             |
| Article Type:                   | Research                                                                                                                                                                                                                                                                                                                                                                                                                                                                                                                                                                                                                                                                                                                                                                                                        |
| Date Submitted by the Author:   | 28-Dec-2016                                                                                                                                                                                                                                                                                                                                                                                                                                                                                                                                                                                                                                                                                                                                                                                                     |
| Complete List of Authors:       | Sun, Jie; School of Public Health, Fudan, Department of Social Medicine; Jing'an Maternal and Child Health Care Center, Shanghai, Department of Child Health Care<br>Nwaru, Bright; The University Of Edinburgh, Allergy & Respiratory Research Group, Centre for Population Health Sciences; University of Tampere, School of Health Sciences<br>Hua, Jing; Shanghai First Maternity and Infant Hospital, Tongji University School of Medicine, Department of Maternal and Child Health Care<br>Li, Xiaohong; School of Public Health, Fudan University, Department of Health Policy and Management ; Innovation Center for Social Risk Governance in Health<br>Wu, Zhuochun; School of Public Health, Fudan University, Department of Social Medicine; Innovation Center for Social Risk Governance in Health |
| <b>Primary Subject Heading</b>: | Epidemiology                                                                                                                                                                                                                                                                                                                                                                                                                                                                                                                                                                                                                                                                                                                                                                                                    |
| Secondary Subject Heading:      | Paediatrics                                                                                                                                                                                                                                                                                                                                                                                                                                                                                                                                                                                                                                                                                                                                                                                                     |
| Keywords:                       | Overweight, Obesity, Body mass index, Longitudinal Study, Infant                                                                                                                                                                                                                                                                                                                                                                                                                                                                                                                                                                                                                                                                                                                                                |
|                                 |                                                                                                                                                                                                                                                                                                                                                                                                                                                                                                                                                                                                                                                                                                                                                                                                                 |

SCHOLARONE™  
Manuscripts

only

## Characterization of Infant BMI peak in urban China

Jie Sun<sup>1,2</sup>, Bright I Nwaru<sup>3,4</sup>, Jing Hua<sup>5</sup>, Xiaohong Li<sup>6,7</sup>, Zhuochun Wu<sup>1,7</sup>

### Abstract

**Objectives:** Infant body mass index (BMI) peak, which has been studied in American and European, proves to be a useful indicator for predicting risk of childhood obesity. We aimed to first characterize infant BMI trajectories in a Chinese longitudinal cohort.

**Methods:** We used serial measurements (n=6-12) of weight and height from healthy term infants (n=2073) in a birth cohort established in urban Shanghai to estimate BMI growth curves from birth to 13.5 months by a polynomial regression model. The relationship between infant BMI peak and childhood BMI was examined using binary logistic analysis.

**Results:** Mean BMI peak was 18.33 kg/m<sup>2</sup> and occurred at 7.61 months. Boys (n=1022) had a higher average BMI peak (18.60 vs 18.07 kg/m<sup>2</sup>, P<0.001) and earlier average timing (7.54 vs 7.67 months, P<0.05) than girls (n=1051). Higher (OR 3.11; 95% CI 2.64-3.66) and later timing (OR 1.35; 95% CI 1.22-1.50) of infant BMI peak were associated with increased risk of early childhood overweight. Similarly, higher magnitude (OR 2.76; 95% CI 2.05-3.73) and later timing (OR 1.34; 95% CI 1.08-1.67) of infant BMI peak were associated with increased risk of childhood obesity.

**Conclusions:** Infant BMI peak is valuable for predicting early childhood overweight and obesity in urban China. As this is first Chinese-based study on the topic, further studies are required to evaluate the utilization in other urban settings of China.

**Key words:** Body mass Index, Obesity, Overweight, Longitudinal Study, Infants

**Word Count:** 2739 words

<sup>1</sup>Department of Social Medicine, School of Public Health, Fudan University, Shanghai, China.

<sup>2</sup>Department of Child Health Care, Jing'an Maternal and Child Health Care Center, Shanghai, China.

<sup>3</sup>School of Health Sciences, University of Tampere, Tampere, Finland.

<sup>4</sup>Asthma UK Centre for Applied Research, Usher Institute of Population Health Sciences and Informatics, University of Edinburgh, Edinburgh, UK.

<sup>5</sup>Department of Maternal and Child Health Care, Shanghai First Maternity and Infant Hospital, Tongji University School of Medicine, Shanghai, China.

<sup>6</sup>Department of Health Policy and Management, School of Public Health, Fudan University, Shanghai, China.

<sup>7</sup>Innovation Center for Social Risk Governance in Health, Fudan University, Shanghai, China

Corresponding author: Zhuochun Wu, Department of Social Medicine, School of Public Health, Fudan University, Fax: 086-021-62309139, P.O. Box 250, 138 Yi Xue Yuan Road, Shanghai 200032, China. zcwu@shmu.edu.cn.

### Strengths and limitations of this study

This is the first community-based cohort study in China to characterize infant BMI peak.

Association of BMI peak with risk of early childhood overweight and obesity will be evaluated.

It's a longitudinal cohort with careful repeated measurements of child growth parameters.

Only about 69.9% of all children in this age range had health records.

The data of parent's BMI and pregnancy weight gain were not available.

### Introduction

The increasing prevalence of childhood overweight and obesity has become a serious public health crisis worldwide.<sup>1-4</sup> The worldwide prevalence of childhood overweight and obesity increased from 4.2% in 1990 to 6.7% in 2010.<sup>5</sup> In urban areas of China, the prevalence of overweight and obesity among children aged 0-5 years increased from 5.3% in 2005 to 8.5% in 2010.<sup>6</sup> Rapid weight gain in early infancy is related to later obesity and cardiovascular risk factors such as hypertension and impaired glucose tolerance in adulthood.<sup>7-11</sup> Although obesity results from the combined effects of genes, environment and lifestyle, rapid genetic changes could not have occurred to result in the rapid increase in prevalence being observed; consequently, environmental and behavioral factors are believed to be key drivers of the burden of obesity.<sup>12</sup> Therapeutic interventions have low cost-effectiveness and poor long-term effects, so infancy may be the most important period to initiate primary preventive strategies for overweight and obesity.<sup>13-15</sup>

Body mass index (BMI), a useful estimate of adiposity for children aged more than two years, correlates with future health outcomes.<sup>2,7</sup> Based on international literature, few studies have evaluated the associations between infant BMI trajectories and childhood overweight and obesity.<sup>12,16-18</sup> Weight-for-length percentile curves are often used but not with age-based changes that reflect different stages of infancy.<sup>16</sup> BMI increases from birth and reaches a maximum called the 'BMI peak' around age 7-9 months, then, it decreases and reaches a nadir around age 4-6 years before increasing once more.<sup>16-18</sup> From Silverwood et al onwards,

1  
2  
3 both age and BMI at BMI peak were positively associated with later BMI z-scores.<sup>17</sup> So far,  
4  
5 several studies have used statistical models of growth trajectories to estimate the magnitude  
6  
7 and timing of infant BMI peak.<sup>16-24</sup>  
8  
9

10 Ancestry-specific differences of Infant BMI peak have been demonstrated between  
11  
12 African-American and European populations.<sup>16</sup> However, until date there has been no  
13  
14 previous study performed in China to demonstrate the utility of infant BMI peak for predicting  
15  
16 the risk of childhood overweight and obesity. Taking advantage of a population-based  
17  
18 longitudinal data set that has serial measurements for height and weight from birth into  
19  
20 childhood in Shanghai, we aimed to estimate the magnitude, timing of infant BMI peak, and to  
21  
22 study the association between infant BMI peak and overweight and obesity by age 2 years.  
23  
24  
25  
26

## 27 **Methods**

### 28 **Study Participants**

29  
30  
31  
32  
33 We obtained data from the Shanghai Jing'an District birth and health records, which is a  
34  
35 population-based longitudinal cohort. There are seventeen urban districts and one suburban  
36  
37 district in Shanghai, with a population of 19 million in 2009. Jing'an District is located at the  
38  
39 city center with a population of 248 thousand in 2009. "Providing free of charge health  
40  
41 examination to children aged 0-3 years" was a project funded by Shanghai government for  
42  
43 Jing'an children born from September 2009. The community health centers in the Jing'an  
44  
45 District provide routine basic medical services to the local community, including well-child  
46  
47 routine checks for infants and young children. A District Childcare Database for all local  
48  
49 health centers in this project was established and managed by the Jing'an maternal and child  
50  
51 health care center. With the information network, data on children's gender, gestational age,  
52  
53 birth weight, feeding and sleeping behaviors, amongst others were recorded by the nurses in  
54  
55 the health centers when they did the child health examination. All children were followed from  
56  
57 one month to two or three years old until they went to kindergarten.  
58  
59  
60

1  
2  
3  
4  
5  
6  
7  
8  
9  
10  
11  
12  
13  
14  
15  
16  
17  
18  
19  
20  
21  
22  
23  
24  
25  
26  
27  
28  
29  
30  
31  
32  
33  
34  
35  
36  
37  
38  
39  
40  
41  
42  
43  
44  
45  
46  
47  
48  
49  
50  
51  
52  
53  
54  
55  
56  
57  
58  
59  
60

For this study, we used data from the Childcare Database for all children who were born from September 1st 2009 through September 1st 2013 and received care at the health centers of Jing'an district. The children were followed up from birth, with data collected at 1, 2, 4, 6, 9, 12, 18 and 24 months of age from all five communities in Jing'an District, representing 69.9% (7456/10674) of all children in this age range in Jing'an District. There were roughly 30% of children moving from Jing'an district to other districts of Shanghai during the study period, which resulted in the missing of the subjects. We gained approval (IRB#2015-TYSQ-03-11) for the current study from the Medical Research Ethics Committee, School of Public Health, Fudan University.

### **Inclusion and exclusion criteria**

Inclusion criteria for infants included in the study were healthy singleton infants, born between 37 and 42 weeks gestational age without physical problems. Participants were also eligible if they had at least six measurements of height and weight in the first 13.5 months of life. This number and range of measurements were referred to BMI modeling set by the CHOP study in Philadelphia, USA.<sup>16,20</sup> As BMI peak is around age 7-9 months, we included children who had at least one visit in the following age ranged 213-274 days. To test the relationship between infant BMI peak and childhood overweight and obesity, measurements for children at age two years were included when such data were available. There were 21.2% (2268/7456) infants eligible for analysis. Of these, we observed 85.9% (1949/2268) children from birth to age two years till September 1st 2015 (Table 1). Preterm infants (n =195), term infants with congenital defect (n=30) were excluded.

### **Anthropometric measures**

Weight and length of children were measured using standardized procedures at the community health centers. Weight was measured by an electronic pediatric scale to the nearest 0.005 kg, and length to the nearest 0.1 cm. BMI z-score (BAZ) of children at age two years were calculated according to the 2006 World Health Organization (WHO) Child Growth

Standards using the WHO Anthro 2009 software.<sup>25</sup> The WHO Child Growth Standards was based on a multi-country study involving breastfed children from six geographically distinct sites.<sup>5</sup> Overweight was defined as BAZ > +1 (BMI >85th percentile) while obesity was defined as BAZ>+2 (BMI >95th percentile). Normal weight was defined as  $-1 \leq \text{BAZ} \leq +1$ .<sup>1,13</sup> Based on reports from previous studies,<sup>11,12,16,18</sup> we extracted factors associated with childhood overweight from the electronic medical records. These factors were birth weight, sex, delivery mode mother's ages, duration of breastfeeding and sleeping data.(Table 2) Because this cohort was set up after birth, some information about pregnancy and parents information was not complete. We classified birth weight as the following categories: 1.5 to less than 2.5 kg, 2.5 to less than 4 kg, and greater than 4 kg.

### **BMI trajectory modeling**

BMI peak was identified from subject-specific BMI growth curves established by serial BMI measurements. A polynomial regression model with quadratic terms was fit to the BMI measurements over time. Regression modeling was used for each child to fit the following equation:<sup>16</sup>

$$\text{BMI} = \beta_0 + [\beta_1 * (\text{age in days})] + [\beta_2 * (\text{age in days})^2]$$

The first inflection point occurred at less than 408 days and identified as BMI peak was derived from the equation. The magnitude and timing of BMI peak and velocity to peak were calculated for each subject from the model. The velocity to the peak was calculated using the following equation, with BMI at 14 days of age as the baseline measurement:<sup>18</sup>

$$(\text{BMI}_{\text{Peak}} - \text{BMI}_{14\text{days}}) / (\text{age}_{\text{BMI Peak}} - 14 \text{ days}).$$

The subjects who had a BMI peak within 14–408 days of life were defined as estimable (“fit”) BMI trajectories, while those who were not identifiable by the model were called inestimable (“not fit”) BMI trajectories.<sup>16</sup>

### **Statistical analysis**

1  
2  
3 SPSS 20.0 statistical software was used for all analyses and metalab2014b for the BMI  
4 trajectory modeling. Data were presented as mean with 95% confidence interval. Categorical  
5 data were summarized by calculating percentages. The chi-square test and two-sampled t  
6 tests were used to examine the differences between participants whose BMI trajectories were  
7 estimable or not inestimable for the quadratic regression model and those who did or did not  
8 have measurements at age two years. To evaluate the associations between covariates and  
9 infant BMI peak characteristics and childhood BMI Z-scores, bivariate analyses were used by  
10 one-way ANOVA with post hoc Bonferroni adjustments. Logistic regression was used to  
11 assess the associations between infant BMI peak trajectories and childhood BMI Z-scores,  
12 adjusting for other background characteristics. Statistical analyses were performed using  
13 only the subjects with estimable BMI peak.<sup>16-19</sup> All statistical tests were two-tailed and P  
14 values <0.05 were considered statistically significant.  
15  
16  
17  
18  
19  
20  
21  
22  
23  
24  
25  
26  
27  
28  
29  
30  
31  
32  
33  
34  
35  
36  
37  
38  
39  
40  
41  
42  
43  
44  
45  
46  
47  
48  
49  
50  
51  
52  
53  
54  
55  
56  
57  
58  
59  
60



## Results

### Description of the study population

The demographic and independent variables of the study population are presented in Table 3. There were 2268 infants eligible for analysis, 49.6% male and 50.4% female. Most had a normal birth weight of 2.5 to less than 4 kg (n=2073, 91.4%). Eighty-five percent (n =1949) of infants had follow-up data at least through the age of 2 years (Table 3). Evaluated by the WHO Child Growth Standards, 17.0% (n =332) infants were overweight (BAZ > +1) and 2.3% (n =44) obese (BAZ > +2) at age 2 years.

### Results of infant BMI trajectory modeling

Individual BMI trajectories were estimable using the polynomial regression model for 91.4% of the sample, with reasonable fit (mean  $R^2 = 0.70 \pm 0.23$ ). Mean BMI peak was 18.33 (95% CI 18.26-18.39) kg/m<sup>2</sup> and occurred at 7.61 (95% CI 7.55-7.67) months. Those subjects with inestimable BMI peak mostly showed either a BMI peak after 408 days of life or a decrease in BMI after birth. The prevalence of macrosomia (birth weight > 4kg) infants with inestimable infancy BMI peak were slightly higher than that with estimable ones (6.7% vs 11.3%,  $P = 0.024$ ). Macrosomia born heavier reached their BMI peak much earlier, since some of them attained BMI peak measurements just after birth. There was no significant difference in other factors between subjects with estimable and inestimable peak BMI trajectories ( $P > 0.05$ ). (Table 3)

### *Participants' characteristics in relation to infant BMI trajectories*

Infant BMI trajectories were related to both sex and birth weight (Table 4). BMI peak was greater, and timing of peak BMI was earlier, in boys than in girls and in children of higher birth weight than those of lower birth weight. There was no statistical significant difference in velocity to BMI peak with regards to infant characteristics.

### **General characteristics of children at age two years**

We tested for differences between infants who had BMI data with estimable BMI peak at age two years (n=1790) vs those who did not (n=159). There was no difference between the two groups in sex, birth weight, mother's age, duration of breastfeeding, duration of sleep ( $P > 0.05$ ).

### **Association between infant BMI peak and childhood overweight and obesity**

Table 5 shows the results of the association between BMI peak and risk of overweight and obesity at two years of age. When only the infant BMI peak was included in the model, higher magnitude and later timing of infant BMI peak increased the risk of overweight at two years. Furthermore, after adjustment for other infant background factors, higher magnitude (OR 3.11; 95% CI 2.64–3.66) and later timing (OR 1.35; 95% CI 1.22-1.50) of infant BMI peak each increased the risk of overweight at two years. The results were also similar with regards to childhood obesity (Table 5).

## Discussion

Using a longitudinal data from a population-based cohort, we have demonstrated in the current analysis that infant BMI peak is useful for predicting childhood overweight and obesity in urban China. Boys had a higher average BMI peak and earlier average timing than girls. Principally, our results show that higher magnitude and later timing of infant BMI peak were each associated with increased risk of early childhood overweight and obesity.

This is the first community-based cohort study in China to characterize infant BMI peak and evaluate its association with risk of early childhood overweight and obesity. Our findings are therefore generalizable to children of similar age in Shanghai city, and to some degree by extension to other urban areas in China. The used data were routinely collected by the health centers where children are offered routine healthcare, such as immunization and physical examination; thus constitute a valid and reliable data set for addressing the study questions. The longitudinal nature of the cohort and the repeated measurements of height and weight parameters provided us with the opportunity to carefully model the BMI trajectories of infants. One limitation of our investigation was that only about 69.9% (7456/10674) of all children in this age range had health records and 85.9% of eligible children had complete follow-up data up to the age of two years, meaning that those with incomplete data were excluded from analysis and risk of selection bias may not be totally ruled out. Another weakness of the study is that the data of parent's BMI, pregnancy weight gain, gestational diabetes mellitus and income were not available, the reason being that the cohort was set up after birth and not prenatally.

So far, few studies have been conducted on the utility of infant BMI peak for predicting childhood overweight and obesity.<sup>16-18</sup> The principal finding of our study that higher magnitude and later timing of infant BMI peak were each associated with increased risk of early childhood overweight and obesity is similar to previous research from the CHOP study

1  
2  
3 conducted in USA<sup>16</sup> and the Uppsala Family Study in Europe.<sup>17</sup> However, some findings of  
4 the current study are not consistent with previous research. A 2010 prospective cohort show  
5 that more rapid increases in weight for length in the first six months of life were associated  
6 with sharply increased risk of childhood obesity.<sup>26</sup> Most previous studies used weight or BMI  
7 at study-dependent fixed ages<sup>26,27</sup> while ours was based on longitudinal and repeated  
8 measures of height and weight. Our results also demonstrate that sex and birth weight  
9 differences were shown in magnitude and timing of the peak but not in pre-peak velocity.<sup>16,18</sup>  
10 In some recent studies, later BMI peak was found for both girls and boys (8-9 months of age).  
11  
12  
13  
14  
15  
16  
17  
18  
19  
20  
21  
22  
23  
24  
25  
26  
27  
28  
29  
30  
31  
32  
33  
34  
35  
36  
37  
38  
39  
40  
41  
42  
43  
44  
45  
46  
47  
48  
49  
50  
51  
52  
53  
54  
55  
56  
57  
58  
59  
60

17,18,20 Furthermore, an earlier and higher BMI peak was found to be positively associated with birth weight.<sup>16,17</sup> In our study, higher birth weight was not associated with a lower velocity, which was found by the CHOP study.<sup>16</sup>

There is no widely accepted method to model infant BMI peak, appropriate peak age range and the number and timing of serial measurements.<sup>20</sup> China is undergoing rapid social and economic developments with consequent improvement in nutritional status. Current estimates indicate that overweight and obesity are rising in China, including among children.<sup>4</sup> However, given the lack of studies evaluating the utility of BMI peak for predicting later childhood overweight and obesity in China, as has been demonstrated in other contexts and shown to be ancestry-specific,<sup>16</sup> it is therefore necessary to undertake such assessment, which will be useful in predicting early onset of obesity and serve as a springboard for planning appropriate interventions targeted at reducing the increasing trend of childhood overweight and obesity in urban China. It is unclear why infants in our study had earlier BMI peaks as (7-8 months) compared to infants from America and Europe (8-9 months),<sup>17,18,20</sup> but as been demonstrated, such differences may reflect possible ancestry-specific BMI peaks across populations; therefore cross-cultural evaluations are required to ascertain the validity of this assertion. Understanding these differences may help design the protocol of public health interventions to control childhood obesity.<sup>28,29,30</sup>

1  
2  
3  
4  
5  
6 The principal finding of the current study suggests that infant BMI peak is useful in predicting  
7 future risk of overweight and obesity in children in urban China; therefore infancy represents  
8 a critical window of opportunity for the prevention of the emerging overweight and obesity  
9 epidemic in children.  
10  
11  
12  
13

## 21 **Conclusion**

22  
23  
24 Using a community-based longitudinal cohort study with repeated measurements of infant  
25 growth parameters, we have for the first time determined that infant BMI peak is valuable for  
26 predicting early childhood overweight and obesity in urban China. Further studies are  
27 required to evaluate the utilization in other urban settings of China.  
28  
29  
30  
31

## 32 **Acknowledgements**

33  
34  
35 We are grateful to the staff in Jing'an maternal and child health care center for data extraction.  
36 We also acknowledge all children and their parent's for participating this project.  
37  
38  
39

## 40 **Authors' contributions**

41  
42  
43 Jie Sun, Bright I Nwaru, and Zhuochun Wu were responsible for the study design, analysis of  
44 the study and approval of the submitted and final version. Jing Hua and Xiaohong Li analyzed  
45 the data, interpreted the results and commented on the manuscript.  
46  
47  
48  
49  
50  
51

## 52 **Funding**

53  
54  
55 This study was funded by National Natural Science Foundation of China [71573049]..  
56  
57  
58  
59  
60

**Ethics Approval**

All procedures performed in this study were in accordance with the ethical standard. We gained approval (IRB#2015–TYSQ–03-11) for the current study from the Medical Research Ethics Committee, School of Public Health, Fudan University. Informed consent was obtained from all individual participants included in the study.

**Competing interests**

The authors declare that they have no conflict of interest.

**References:**

1. Neelon SEB, Andersen CS, Morgen CS, Kamper-Jørgensen M, Oken E, Gillman MW, et al. Early child care and obesity at 12 months of age in the Danish National Birth Cohort. *Int J Obes (Lond)* 2015;39:33-38.
2. Freedman DS, Mei Z, Srinivasan SR, Berenson GS, Dietz WH. Cardiovascular risk factors and excess adiposity among overweight children and adolescents: the Bogalusa Heart Study. *J Pediatr* 2007;150:12–17.
3. Skinner AC, Perrin EM, Skelton JA. Prevalence of obesity and severe obesity in US children, 1994-2014. *Obesity (Silver Spring)* 2016;24:1116-1123.
4. Ji C. Report on Childhood Obesity in China (4) Prevalence and Trends of Overweight and Obesity in Chinese Urban School-age Children and Adolescents, 1985-2000. *Biomed Environ Sci* 2007;20:100-106.
5. de Onis M, Blössner M, Borghi E. Global prevalence and trends of overweight and obesity among preschool children. *Am J Clin Nutr* 2010;92:1257–1264.
6. National Report on Nutritional status of children aged 0-6 year. *China: National health and Family Planning Commission*. China; 2012.
7. Andersen LG, Holst C, Michaelsen KF, Baker JL, Sørensen TI. Weight and weight gain during early infancy predict childhood obesity: a case- cohort study. *Int J Obes (Lond)* 2012;36:1306–1311.
8. Baird J, Fisher D, Lucas P, Kleijnen J, Roberts H, Law C. Being big or growing fast: systematic review of size and growth in infancy and later obesity. *BMJ* 2005;331:929.
9. Leunissen RW, Kerkhof GF, Stijnen T, Hokken-Koelega A. Timing and tempo of first-year rapid growth in relation to cardiovascular and metabolic risk profile in early adulthood. *JAMA* 2009;301:2234-2242.
10. Monteiro PO, Victora CG. Rapid growth in infancy and childhood and obesity in later life—a systematic review. *Obes Rev* 2005;6:143–154.
11. Weng SF, Redsell SA, Swift JA, Yang M, Glazebrook CP. Systematic review and meta-analyses of risk factors for childhood overweight identifiable during infancy. *Arch Dis Child* 2012;97:1019–1026.
12. Guo Y. Growth level of urban Chinese infants from birth to 2 years, body mass index Z scores' predicting model and its age trajectory in relation to maternal pre-pregnancy body weight status. *Huangzhong Technology University China*; 2013.
13. Ma JQ, Zhou LL, Hu YQ, Liu SS, Sheng XY . Association between feeding practices and weight status in young children. *BMC Pediatrics* 2015;15:97.
14. Gortmaker SL, Swinburn B, Levy D, Carter R, Mabry PL, Diane Finegood et al. Changing the Future of Obesity: Science, Policy and Action. *Lancet* 2011;378:838–847.
15. Robinson SM, Crozier SR, Harvey NC, Barton BD, Law CM, Godfrey KM, et al. Modifiable early-life risk factors for childhood adiposity and overweight: an analysis of their combined impact and potential for prevention. *Am J Clin Nutr* 2015;101:368-375.
16. Roy SM, Chesni A, Mentch F, Xiao R, Chiavacci R, Mitchell JA, et al. Body Mass Index (BMI) Trajectories in Infancy differ by population ancestry and may presage disparities in early childhood obesity. *J Clin Endocrinol Metab* 2015;100:1551-1560.

- 1  
2  
3 17. Silverwood RJ, De Stavola BL, Cole TJ, Leo DA. BMI peak in infancy as a predictor for later BMI in the  
4 Uppsala Family Study. *In J Obes (Lond)* 2009;33:929-937.  
5  
6 18. Jensen SM, Ritz C, Ejlerskov KT, Mølgaard C, Michaelsen KF. Infant BMI peak, breastfeeding, and body  
7 composition at age 3y. *Am J Clin Nutr* 2015;101:319-325.  
8  
9 19. WHO Multicentre Growth Reference Study Group. WHO Child Growth Standards: Length/height-for-age,  
10 Weight-for-age, Weight-for-length, Weight-for-height, and Body Mass Index-for-age: Methods and  
11 Development. Geneva: World Health Organization, 2006. Available from:  
12 <http://www.who.int/childgrowth/standards/en/>  
13  
14 20. Wen X, Kleinman K, Gillman MW, Rifas-Shiman SL, Taveras EM. Childhood body mass index  
15 trajectories: modeling, characterizing, pairwise correlations and socio-demographic predictors of trajectory  
16 characteristics. *BMC Med Res Methodol* 2012;12:38.  
17  
18 21. Chivers P, Hands B, Parker H, Bulsara M, Beilin LJ, Kendall GE et al. Body mass index, adiposity  
19 rebound and early feeding in a longitudinal cohort (Raine Study). *In J Obes (Lond)* 2010;34:1169-1176.  
20  
21 22. Johnson W, Choh AC, Lee M, Towne B, Czerwinski SA, Demerath EW. Characterization of the Infant BMI  
22 Peak: Sex Differences, Birth Year Cohort Effects, Association with Concurrent Adiposity, and Heritability. *Am*  
23 *J Hum Biol* 2013;25:378-388.  
24  
25 23. Giles LC, Whitrow MJ, Davies MJ, Davies CE, Rumbold AR, Moore VM. Growth trajectories in early  
26 childhood, their relationship with antenatal and postnatal factors, and development of obesity by age 9 years:  
27 results from an Australian birth cohort study. *Int J Obes (Lond)* 2015;39:1049-1056.  
28  
29 24. Sovio U, Kaakinen M, Tzoulaki I, Das S, Ruokonen A, Pouta A, et al. How do changes in body mass index  
30 in infancy and childhood associate with cardiometabolic profile in adulthood? Findings from the Northern  
31 Finland Birth Cohort 1966 Study. *Int J Obes (Lond)* 2014;38:53-59.  
32  
33 25. WHO. Anthro for personal computers, version 3. Software for assessing growth and development of the  
34 world's children. Geneva: WHO, 2009. Available from: <http://www.who.int/childgrowth/software/en/>  
35  
36 26. Taveras EM, Rifas-Shiman S, Belfort MB, Kleinman KP, Oken E, Gillman MW. Weight status in the first 6  
37 months of life and obesity at 3 years of age. *Pediatrics* 2009;123:1177-1183.  
38  
39 27. Guo B, Mei H, Yang S, Zhang J. Prenatal factors associated with high BMI status of infants and  
40 toddlers. *Chin J Pediatr* 2014;52:464-467.  
41  
42 28. Taveras EM, Gillman MW, Kleinman KP, Rich-Edwards JW, Rifas-Shiman SL. Racial/Ethnic Differences  
43 in Early Life Risk Factors for Childhood obesity. *Pediatrics* 2010;125:686-695.  
44  
45 29. Taveras EM, Gillman MW, Kleinman KP, Rich-Edwards JW, Rifas-Shiman SL. Reducing racial/ethnic  
46 disparities in childhood obesity: the role of early life risk factors. *Jama Pediatrics* 2013;167:1-7.  
47  
48 30. Zilanawala A, Davis-Kean P, Nazroo J, Sacker A, Simonton S, Kelly Y.  
49 Race/ethnic disparities in early childhood BMI, obesity and overweight in the  
50 United Kingdom and United States. *Int J Obes (Lond)* 2015;39:520-529.  
51  
52  
53  
54  
55  
56  
57  
58  
59  
60



**Table 1 Description of children eligible in the study**

| Year         | Eligible children<br>n | Children with data at<br>age 2y<br>n (%) |
|--------------|------------------------|------------------------------------------|
| 2009         | 190                    | 169 (88.9)                               |
| 2010         | 413                    | 369 (89.3)                               |
| 2011         | 606                    | 545 (89.9)                               |
| 2012         | 660                    | 571 (86.5)                               |
| 2013         | 399                    | 295 (73.9)                               |
| Total number | 2268                   | 1949 (85.9)                              |

For peer review only

**Table 2 Description of dependent and independent variables**

| Variable                  | Description                        |
|---------------------------|------------------------------------|
| Dependent Variables       |                                    |
| Overweight                | 1-if yes at age 2y 0-otherwise     |
| Obesity                   | 1-if yes at age 2y 0-otherwise     |
| Independent variables     |                                    |
| Sex                       | 1-male 0-female                    |
| Delivery Mode             | 1-Cesarean Section 0-Vaginal Birth |
| Mother Age                | 1-above 35y 0-otherwise            |
| Duration of Breastfeeding | Continuous variable                |
| Duration of Sleep         | Continuous variable                |
| Birth Weight              | Continuous variable                |
| Magnitude of BMI Peak     | Continuous variable                |
| Timing of BMI Peak        | Continuous variable                |
| Velocity to BMI Peak      | Continuous variable                |

**Table 3** Participants' characteristics by subjects with "estimable"\* and "inestimable"# BMI peak

| Characteristics                             | n          | Estimable *, n (%)           | Inestimable #, n (%) |
|---------------------------------------------|------------|------------------------------|----------------------|
| Total number                                | 2268       | 2073                         | 195                  |
| Sex                                         |            |                              |                      |
| Male                                        | 1126       | 1022 (49.3)                  | 104 (53.3)           |
| Female                                      | 1142       | 1051 (50.7)                  | 91 (46.7)            |
| Birth weight                                |            |                              |                      |
| 1.5 to <2.5kg                               | 35         | 30 (1.4)                     | 5 (2.6)              |
| 2.5 to <4.0kg                               | 2073       | 1905 (91.9)                  | 168 (86.2)           |
| <b>≥4kg</b>                                 | <b>160</b> | <b>138 (6.7)<sup>a</sup></b> | <b>22 (11.3)</b>     |
| Delivery mode                               |            |                              |                      |
| Vaginal birth                               | 1086       | 989 (47.7)                   | 97 (49.7)            |
| Cesarean section                            | 1182       | 1084 (52.3)                  | 98 (50.3)            |
| Mother Age                                  |            |                              |                      |
| >35y                                        | 176        | 159 (7.7)                    | 17 (8.7)             |
| ≤35y                                        | 2092       | 1914 (92.3)                  | 178 (91.3)           |
| Total number with data at age 2y            | 1949       | 1790 (86.3)                  | 159 (81.5)           |
| Total number overweight and obese at age 2y | 332        | 313 (17.5)                   | 19 (11.9)            |
| Total number and obese at age               | 44         | 43 (2.4)                     | 1 (0.6)              |

a.P<0.05

\* Estimable: fit and identifiable BMI peak within 14–408 days of life.

# Inestimable: Not fit and identifiable.

Chi-square tests were used to examine the differences between Estimable or Inestimable group.

**Table 4 Infant characteristics in relation to infant BMI peak trajectories**

|                  |                                      | infant BMI peak,<br>kg/m <sup>2</sup> , Mean (95%<br>CI) | Age at Infant BMI<br>peak, mo,<br>Mean (95% CI) | Velocity to Peak,<br>kg/m <sup>2</sup> , mo.<br>Mean (95% CI) |
|------------------|--------------------------------------|----------------------------------------------------------|-------------------------------------------------|---------------------------------------------------------------|
| Total            | n=2073                               | 18.33(18.26-18.39)                                       | 7.61(7.55-7.67)                                 | 0.43(0.42-0.44)                                               |
| Sex              |                                      |                                                          |                                                 |                                                               |
|                  | <b>male (n=1022)</b>                 | <b>18.60(18.21-18.69)<sup>a</sup></b>                    | <b>7.54(7.46-7.63)<sup>b</sup></b>              | 0.42(0.41-0.43)                                               |
|                  | female (n=1051)                      | 18.07(17.98-18.16)                                       | 7.67(7.59-7.76)                                 | 0.43(0.42-0.44)                                               |
| Birth<br>Weight  |                                      |                                                          |                                                 |                                                               |
|                  | 1.5 to<br><2.5kg(n=30)               | 17.63(17.13-18.13)                                       | 8.13(7.56-8.70)                                 | 0.44(0.35-0.53)                                               |
|                  | 2.5 to<br><4.0kg(n=1905)             | 18.27(18.21-18.34)                                       | 7.63(7.57-7.70)                                 | 0.43(0.42-0.44)                                               |
|                  | <b>&gt;=4kg(n=138)</b>               | <b>19.25(18.97-19.52)<sup>b</sup></b>                    | <b>7.11(6.88-7.34)<sup>a</sup></b>              | 0.39(0.35-0.42)                                               |
| Delivery<br>Mode |                                      |                                                          |                                                 |                                                               |
|                  | Vaginal birth<br>(n=989)             | 18.24(18.14-18.34)                                       | 7.64(7.56-7.73)                                 | 0.43(0.42-0.44)                                               |
|                  | <b>Cesarean section<br/>(n=1084)</b> | <b>18.41(18.32-18.50)<sup>a</sup></b>                    | 7.58(7.49-7.66)                                 | 0.43(0.42-0.44)                                               |
| Mother<br>Age    |                                      |                                                          |                                                 |                                                               |
|                  | >35y(n=159)                          | 18.42(18.18-18.66)                                       | 7.61(7.49-7.82)                                 | 0.44(0.41-0.48)                                               |
|                  | <=35y(n=1914)                        | 18.32(18.25-18.39)                                       | 7.61(7.55-7.67)                                 | 0.42(0.41-0.43)                                               |

a.P<0.001 b.P<0.05

The analysis includes only infants who had BMI peak within 0-408 days and whose BMI trajectories were estimable by the quadratic model.

Bivariate comparison was performed using one-way ANOVA with post hoc Bonferroni multiple comparison test.

Table 5 Association between infant BMI peak and overweight and obesity at age 2 years

|                                            | Overweight at 2y (n=1790 )                                   |                                              | Obesity at 2y (n=1790 )                                      |                                              |
|--------------------------------------------|--------------------------------------------------------------|----------------------------------------------|--------------------------------------------------------------|----------------------------------------------|
|                                            | Model containing infant BMI trajectory characteristics alone | Initial model plus all independent variables | Model containing infant BMI trajectory characteristics alone | Initial model plus all independent variables |
|                                            | OR (95% CI)                                                  | OR (95% CI)                                  | OR (95% CI)                                                  | OR (95% CI)                                  |
| Magnitude of BMI peak, kg/m <sup>2</sup> ) | <b>2.94(2.54-3.40)<sup>a</sup></b>                           | <b>3.11(2.64-3.66)<sup>a</sup></b>           | <b>2.76(2.11-3.60)<sup>a</sup></b>                           | <b>2.76(2.05-3.73)<sup>a</sup></b>           |
| Timing of BMI peak, mo                     | <b>1.36(1.23-1.51)<sup>b</sup></b>                           | <b>1.35(1.22-1.50)<sup>a</sup></b>           | <b>1.33(1.08-1.65)<sup>b</sup></b>                           | <b>1.34(1.08-1.67)<sup>b</sup></b>           |
| Velocity to BMI peak, kg/m <sup>2</sup> mo | <b>0.17(0.07-0.40)<sup>c</sup></b>                           | <b>0.14(0.06-0.35)<sup>a</sup></b>           | <b>0.10(0.02-0.56)<sup>b</sup></b>                           | <b>0.11(0.02-0.68)<sup>c</sup></b>           |
| male(vs female) birth weight,g(continuous) |                                                              | <b>0.66(0.49-0.89)<sup>b</sup></b>           |                                                              | 0.94(0.48-1.85)                              |
| Duration of breastfeeding(continuous)      |                                                              | 1.00(1.00-1.00)                              |                                                              | 1.00(0.99-1.00)                              |
| Duration of Sleep(continuous)              |                                                              | 0.97(0.94-1.01)                              |                                                              | 0.92(0.84-1.01)                              |
| Cesarean section(vs Vaginal Birth)         |                                                              | 0.89(0.77-1.02)                              |                                                              | 0.88(0.63-1.23)                              |
| Mother Age(>35y vs <=35y)                  |                                                              | 1.09(0.82-1.45)                              |                                                              | 0.87(0.45-1.65)                              |
|                                            |                                                              | 0.69(0.39-1.22)                              |                                                              | 0.75(0.21-2.62)                              |

a.P<0.001 b.P<0.01 c.P<0.05

The analysis includes only infants who had BMI peak within 0-408 days and whose BMI trajectories were estimable by the quadratic model.

**STROBE 2007 (v4) checklist of items to be included in reports of observational studies in epidemiology\***  
**Checklist for cohort, case-control, and cross-sectional studies (combined)**

| Section/Topic             | Item # | Recommendation                                                                                                                                                                                                                                                                                                                                                                                                                                                         | Reported on page # |
|---------------------------|--------|------------------------------------------------------------------------------------------------------------------------------------------------------------------------------------------------------------------------------------------------------------------------------------------------------------------------------------------------------------------------------------------------------------------------------------------------------------------------|--------------------|
| Title and abstract        | 1      | (a) Indicate the study's design with a commonly used term in the title or the abstract                                                                                                                                                                                                                                                                                                                                                                                 | 1                  |
|                           |        | (b) Provide in the abstract an informative and balanced summary of what was done and what was found                                                                                                                                                                                                                                                                                                                                                                    | 1                  |
| <b>Introduction</b>       |        |                                                                                                                                                                                                                                                                                                                                                                                                                                                                        |                    |
| Background/rationale      | 2      | Explain the scientific background and rationale for the investigation being reported                                                                                                                                                                                                                                                                                                                                                                                   | 2                  |
| Objectives                | 3      | State specific objectives, including any pre-specified hypotheses                                                                                                                                                                                                                                                                                                                                                                                                      | 3                  |
| <b>Methods</b>            |        |                                                                                                                                                                                                                                                                                                                                                                                                                                                                        |                    |
| Study design              | 4      | Present key elements of study design early in the paper                                                                                                                                                                                                                                                                                                                                                                                                                | 4                  |
| Setting                   | 5      | Describe the setting, locations, and relevant dates, including periods of recruitment, exposure, follow-up, and data collection                                                                                                                                                                                                                                                                                                                                        | 3-4, Table-1       |
| Participants              | 6      | (a) <i>Cohort study</i> —Give the eligibility criteria, and the sources and methods of selection of participants. Describe methods of follow-up<br><i>Case-control study</i> —Give the eligibility criteria, and the sources and methods of case ascertainment and control selection. Give the rationale for the choice of cases and controls<br><i>Cross-sectional study</i> —Give the eligibility criteria, and the sources and methods of selection of participants | 4                  |
|                           |        | (b) <i>Cohort study</i> —For matched studies, give matching criteria and number of exposed and unexposed<br><i>Case-control study</i> —For matched studies, give matching criteria and the number of controls per case                                                                                                                                                                                                                                                 | 4                  |
| Variables                 | 7      | Clearly define all outcomes, exposures, predictors, potential confounders, and effect modifiers. Give diagnostic criteria, if applicable                                                                                                                                                                                                                                                                                                                               | 5, Table-2         |
| Data sources/ measurement | 8*     | For each variable of interest, give sources of data and details of methods of assessment (measurement). Describe comparability of assessment methods if there is more than one group                                                                                                                                                                                                                                                                                   | 4,5                |
| Bias                      | 9      | Describe any efforts to address potential sources of bias                                                                                                                                                                                                                                                                                                                                                                                                              | 5                  |
| Study size                | 10     | Explain how the study size was arrived at                                                                                                                                                                                                                                                                                                                                                                                                                              | 5                  |
| Quantitative variables    | 11     | Explain how quantitative variables were handled in the analyses. If applicable, describe which groupings were chosen and why                                                                                                                                                                                                                                                                                                                                           |                    |
| Statistical methods       | 12     | (a) Describe all statistical methods, including those used to control for confounding                                                                                                                                                                                                                                                                                                                                                                                  | 5,6                |
|                           |        | (b) Describe any methods used to examine subgroups and interactions                                                                                                                                                                                                                                                                                                                                                                                                    | 6                  |
|                           |        | (c) Explain how missing data were addressed                                                                                                                                                                                                                                                                                                                                                                                                                            | 4                  |
|                           |        | (d) <i>Cohort study</i> —If applicable, explain how loss to follow-up was addressed<br><i>Case-control study</i> —If applicable, explain how matching of cases and controls was addressed                                                                                                                                                                                                                                                                              | 4                  |

|                          |     |                                                                                                                                                                                                              |            |
|--------------------------|-----|--------------------------------------------------------------------------------------------------------------------------------------------------------------------------------------------------------------|------------|
|                          |     | <i>Cross-sectional study</i> —If applicable, describe analytical methods taking account of sampling strategy                                                                                                 |            |
|                          |     | (e) Describe any sensitivity analyses                                                                                                                                                                        |            |
| <b>Results</b>           |     |                                                                                                                                                                                                              |            |
| Participants             | 13* | (a) Report numbers of individuals at each stage of study—eg numbers potentially eligible, examined for eligibility, confirmed eligible, included in the study, completing follow-up, and analysed            | 5          |
|                          |     | (b) Give reasons for non-participation at each stage                                                                                                                                                         | 5          |
|                          |     | (c) Consider use of a flow diagram                                                                                                                                                                           |            |
| Descriptive data         | 14* | (a) Give characteristics of study participants (eg demographic, clinical, social) and information on exposures and potential confounders                                                                     | Table 3    |
|                          |     | (b) Indicate number of participants with missing data for each variable of interest                                                                                                                          | Table 3    |
|                          |     | (c) <i>Cohort study</i> —Summarise follow-up time (eg, average and total amount)                                                                                                                             | 4          |
| Outcome data             | 15* | <i>Cohort study</i> —Report numbers of outcome events or summary measures over time                                                                                                                          | 7          |
|                          |     | <i>Case-control study</i> —Report numbers in each exposure category, or summary measures of exposure                                                                                                         |            |
|                          |     | <i>Cross-sectional study</i> —Report numbers of outcome events or summary measures                                                                                                                           |            |
| Main results             | 16  | (a) Give unadjusted estimates and, if applicable, confounder-adjusted estimates and their precision (eg, 95% confidence interval). Make clear which confounders were adjusted for and why they were included | 8, Table 5 |
|                          |     | (b) Report category boundaries when continuous variables were categorized                                                                                                                                    | Table 3, 4 |
|                          |     | (c) If relevant, consider translating estimates of relative risk into absolute risk for a meaningful time period                                                                                             |            |
| Other analyses           | 17  | Report other analyses done—eg analyses of subgroups and interactions, and sensitivity analyses                                                                                                               |            |
| <b>Discussion</b>        |     |                                                                                                                                                                                                              |            |
| Key results              | 18  | Summarise key results with reference to study objectives                                                                                                                                                     | 9          |
| Limitations              | 19  | Discuss limitations of the study, taking into account sources of potential bias or imprecision. Discuss both direction and magnitude of any potential bias                                                   | 9          |
| Interpretation           | 20  | Give a cautious overall interpretation of results considering objectives, limitations, multiplicity of analyses, results from similar studies, and other relevant evidence                                   | 10         |
| Generalisability         | 21  | Discuss the generalisability (external validity) of the study results                                                                                                                                        | 11         |
| <b>Other information</b> |     |                                                                                                                                                                                                              |            |
| Funding                  | 22  | Give the source of funding and the role of the funders for the present study and, if applicable, for the original study on which the present article is based                                                | 12         |

\*Give information separately for cases and controls in case-control studies and, if applicable, for exposed and unexposed groups in cohort and cross-sectional studies.

**Note:** An Explanation and Elaboration article discusses each checklist item and gives methodological background and published examples of transparent reporting. The STROBE checklist is best used in conjunction with this article (freely available on the Web sites of PLoS Medicine at <http://www.plosmedicine.org/>, Annals of Internal Medicine at <http://www.annals.org/>, and Epidemiology at <http://www.epidem.com/>). Information on the STROBE Initiative is available at [www.strobe-statement.org](http://www.strobe-statement.org).

# BMJ Open

## Infant BMI Peak as a predictor of overweight and obesity at age 2 years in a Chinese community-based cohort

|                                 |                                                                                                                                                                                                                                                                                                                                                                                                                                                                                                                                                                                                                                                                                                                                                                                                                 |
|---------------------------------|-----------------------------------------------------------------------------------------------------------------------------------------------------------------------------------------------------------------------------------------------------------------------------------------------------------------------------------------------------------------------------------------------------------------------------------------------------------------------------------------------------------------------------------------------------------------------------------------------------------------------------------------------------------------------------------------------------------------------------------------------------------------------------------------------------------------|
| Journal:                        | <i>BMJ Open</i>                                                                                                                                                                                                                                                                                                                                                                                                                                                                                                                                                                                                                                                                                                                                                                                                 |
| Manuscript ID                   | bmjopen-2016-015122.R1                                                                                                                                                                                                                                                                                                                                                                                                                                                                                                                                                                                                                                                                                                                                                                                          |
| Article Type:                   | Research                                                                                                                                                                                                                                                                                                                                                                                                                                                                                                                                                                                                                                                                                                                                                                                                        |
| Date Submitted by the Author:   | 13-Jun-2017                                                                                                                                                                                                                                                                                                                                                                                                                                                                                                                                                                                                                                                                                                                                                                                                     |
| Complete List of Authors:       | Sun, Jie; School of Public Health, Fudan, Department of Social Medicine; Jing'an Maternal and Child Health Care Center, Shanghai, Department of Child Health Care<br>Nwaru, Bright; The University Of Edinburgh, Allergy & Respiratory Research Group, Centre for Population Health Sciences; University of Tampere, School of Health Sciences<br>Hua, Jing; Shanghai First Maternity and Infant Hospital, Tongji University School of Medicine, Department of Maternal and Child Health Care<br>Li, Xiaohong; School of Public Health, Fudan University, Department of Health Policy and Management ; Innovation Center for Social Risk Governance in Health<br>Wu, Zhuochun; School of Public Health, Fudan University, Department of Social Medicine; Innovation Center for Social Risk Governance in Health |
| <b>Primary Subject Heading</b>: | Epidemiology                                                                                                                                                                                                                                                                                                                                                                                                                                                                                                                                                                                                                                                                                                                                                                                                    |
| Secondary Subject Heading:      | Paediatrics                                                                                                                                                                                                                                                                                                                                                                                                                                                                                                                                                                                                                                                                                                                                                                                                     |
| Keywords:                       | Overweight, Obesity, Body mass index, Longitudinal Study, Infant                                                                                                                                                                                                                                                                                                                                                                                                                                                                                                                                                                                                                                                                                                                                                |
|                                 |                                                                                                                                                                                                                                                                                                                                                                                                                                                                                                                                                                                                                                                                                                                                                                                                                 |

SCHOLARONE™  
Manuscripts



## Infant BMI peak as a predictor of overweight and obesity at age 2 years in a Chinese community-based cohort

Jie Sun<sup>1,2</sup>, Bright I Nwaru<sup>3,4</sup>, Jing Hua<sup>5</sup>, Xiaohong Li<sup>6,7</sup>, Zhuochun Wu<sup>1,7</sup>

### Abstract

**Objectives:** Infant body mass index (BMI) peak, which has been studied in American and European populations and proved to be a useful indicator for predicting risk of childhood obesity, has not been assessed in China. We aimed to characterize infant BMI trajectories in a Chinese longitudinal cohort and to evaluate whether BMI peak can predict overweight and obesity at age 2 years.

**Methods:** Serial measurements (n=6-12) of weight and length from healthy term infants (n=2073) in a birth cohort established in urban Shanghai were conducted to estimate BMI growth curves from birth to 13.5 months using a polynomial regression model. BMI peak characteristics [age (in months) and magnitude (BMI; in kg/m<sup>2</sup>) at peak and pre-peak velocities (in kg/m<sup>2</sup>/month)] were estimated. The relationship between infant BMI peak and childhood BMI at age 2 years was examined using binary logistic analysis.

**Results:** Mean age at peak BMI was 7.61 months, with a magnitude of 18.33 kg/m<sup>2</sup>. Boys (n=1022) had a higher average peak BMI (18.60 vs. 18.07 kg/m<sup>2</sup>, P<0.001) and earlier average timing of achieving peak value (7.54 vs. 7.67 months, P<0.05) than girls (n=1051). With the peak BMI value increasing by 1 kg/m<sup>2</sup> or the peak time by 1 month every time, the risk of overweight at age 2 years increased by 2.11 times (OR 3.11; 95% CI 2.64-3.66) and 35% (OR 1.35; 95% CI 1.21-1.50) respectively. Similarly, higher magnitude (OR 2.69; 95% CI 2.00-3.61) and later timing (OR 1.35; 95% CI 1.08-1.68) of infant BMI peak were associated with increased risk of childhood obesity at age 2 years.

**Conclusions:** Infant BMI peak is proved to be valuable for predicting early childhood overweight and obesity in urban Shanghai. Since this is the first Chinese community-based cohort study on the topic, further studies are required for other infant populations in different areas of China.

**Key words:** Body mass Index, Obesity, Overweight, Longitudinal Study, Infants

**Word Count:** 3694 words

<sup>1</sup>Department of Social Medicine, School of Public Health, Fudan University, Shanghai, China.

<sup>2</sup>Department of Child Health Care, Jing'an Maternal and Child Health Care Center, Shanghai, China.

<sup>3</sup>School of Health Sciences, University of Tampere, Tampere, Finland.

<sup>4</sup>Asthma UK Centre for Applied Research, Usher Institute of Population Health Sciences and Informatics, University of Edinburgh, Edinburgh, UK.

<sup>5</sup>Department of Maternal and Child Health Care, Shanghai First Maternity and Infant Hospital, Tongji University School of Medicine,

1  
2  
3 Shanghai, China.

4  
5 <sup>6</sup>Department of Health Policy and Management, School of Public Health, Fudan University, Shanghai,China.

6  
7 <sup>7</sup>Innovation Center for Social Risk Governance in Health, Fudan University, Shanghai, China

8 Corresponding author:Zhuochun Wu , Department of Social Medicine , School of Public Health, Fudan University, Fax:  
9 086-021-62309139, P.O. Box 250,138 Yi Xue Yuan Road, Shanghai 200032, China . zcwu@shmu.edu.cn.

### 10 11 **Strengths and limitations of this study**

12 This is the first community-based cohort study in China to characterize infant BMI peak.

13 Association of BMI peak with risk of early childhood overweight and obesity will be evaluated.

14 It's a longitudinal cohort with careful repeated measurements of child growth parameters.

15 Only about 69.9% of all children in this age range had health records.

16 The data of parent's BMI and pregnancy weight gain were not available.

### 17 18 19 20 21 22 23 24 25 26 **Introduction**

27  
28 The worldwide overweight prevalence among children aged under 5 years has risen from 4.8%  
29 in 1990 to 6.1% in 2014. The current worldwide obesity epidemic is a serious public health  
30 crisis. <sup>(1-5)</sup> In 2014, almost half (48%) of them lived in Asia. <sup>(5)</sup> In urban areas of China, the  
31 prevalence increased from 5.3% in 2005 to 8.5% in 2010. <sup>(6)</sup> Rapid weight gain in early infancy  
32 is related to later obesity and cardiovascular risk factors such as hypertension and impaired  
33 glucose tolerance in adulthood. <sup>(7-11)</sup> Although obesity results from the combined effects of  
34 genes, environment and lifestyle, rapid genetic changes could not have occurred to result in  
35 the rapid increase in prevalence being observed; consequently, environmental and  
36 behavioral factors are believed to be key drivers of the burden of obesity. <sup>(12)</sup> Therapeutic  
37 interventions have low cost-effectiveness and poor long-term effects, so infancy may be the  
38 most important period to initiate primary preventive strategies for overweight and  
39 obesity. <sup>(13-15)</sup>

40  
41  
42  
43  
44  
45  
46  
47  
48  
49  
50  
51  
52  
53  
54  
55  
56  
57  
58  
59  
60  
Body mass index (BMI), a useful estimate of adiposity for children aged more than two years,  
correlates with future health outcomes. <sup>(2, 7)</sup> It's reported that even a modest reduction in BMI  
z-score after one year of obesity intervention was associated with improvement in several

1  
2  
3 cardiovascular risk factors.<sup>(16)</sup> In young children, waist-to-height-ratio (WHtR) is not superior  
4 to BMI in estimating body fat percentage, nor is WHtR better correlated with cardiometabolic  
5 risk factors than BMI in overweight/obese children.<sup>(17)</sup> One study in Singapore suggests an  
6 important impact of early BMI development on later metabolic outcomes in Asian  
7 populations.<sup>(18)</sup>  
8  
9

10  
11  
12 Based on international literature, few studies have evaluated the associations between infant  
13 BMI trajectories and childhood overweight and obesity.<sup>(12, 19-21)</sup> Weight-for-length percentile  
14 curves are often used but not with age-based changes that reflect different stages of  
15 infancy.<sup>(19)</sup> BMI increases from birth and reaches a maximum called the 'BMI peak' around  
16 age 7-9 months, then, it decreases and reaches a nadir around age 4-6 years before  
17 increasing once more.<sup>(19-21)</sup> From Silverwood et al onwards, both age and magnitude at peak  
18 were positively associated with later BMI z-scores.<sup>(20)</sup> So far, several studies have used  
19 statistical models of growth trajectories to estimate the magnitude and timing of infant BMI  
20 peak.<sup>(18-27)</sup>  
21  
22

23  
24 Ancestry-specific differences of Infant BMI peak have been demonstrated between  
25 African-American and European populations.<sup>(19)</sup> However, until date there has been no  
26 previous study performed in China to demonstrate the utility of infant BMI peak for predicting  
27 the risk of childhood overweight and obesity. It is possible that different modeling methods  
28 (such as natural cubic splines, fractional polynomials) used to derive BMI peak  
29 characteristics could account for the observed differences across populations.<sup>(18)</sup> To make  
30 comparison with other populations, we referred to BMI modeling set by the CHOP study in  
31 Philadelphia, USA.<sup>(19, 23)</sup> Taking advantage of a community-based longitudinal data set that  
32 has serial measurements for length and weight from birth into childhood in Shanghai, we  
33 aimed to estimate the BMI peak characteristics to study the association between infant BMI  
34 peak and overweight and obesity at age 2 years.  
35  
36  
37  
38  
39  
40  
41  
42  
43  
44  
45  
46  
47  
48  
49  
50  
51  
52  
53  
54  
55  
56  
57  
58  
59  
60

## Methods

### Study Participants

We obtained data from the Shanghai Jing'an District birth and health records, which is a community-based longitudinal cohort. There are seventeen urban districts and one suburban district in Shanghai, with a population of 19 million in 2009. Jing'an District is located at the city center with a population of 248 thousand in 2009. "Providing free of charge health examination to children aged 0-3 years" was a project funded by Shanghai government for Jing'an children born from September 2009. The community health centers in the Jing'an District provide well-child routine checks for infants and young children. A District Childcare Database for all health centers in this project was established and managed by the Jing'an maternal and child health care center. With the information network, data on children's gender, gestational age, birthweight, feeding and sleeping behaviors, amongst others were recorded by the nurses in the health centers when they did the child health examination. All children were followed from one month to two or three years old until they went to kindergarten.

For this study, we used data from the Childcare Database for all children who were born from September 1st 2009 through September 1st 2013 and received care at the health centers of Jing'an district. The children were followed up from birth, with data collected at 1, 2, 4, 6, 9, 12, 18 and 24 months of age from all five communities in Jing'an District, representing 69.9% (7456/10674) of all children in this age range in Jing'an District. There were roughly 30% of children moving from Jing'an district to other districts of Shanghai during the study period, which resulted in the loss to follow-up. We gained approval (IRB#2015-TYSQ-03-11) for the current study from the Medical Research Ethics Committee, School of Public Health, Fudan University.

### Inclusion and exclusion criteria

Inclusion criteria for infants included in the study were healthy singleton infants, born between 37 and 42 weeks gestational age without physical problems. Participants were eligible if they had at least six measurements of length and weight in the first 13.5 months of life. This number and range of measurements were referred to BMI modeling set by the CHOP study in Philadelphia, USA.<sup>(19, 23)</sup> As age of BMI peak is around 7-9 months, we included children who had at least one visit in the following age ranged 213-274 days. To test the relationship between infant BMI peak and childhood overweight and obesity, measurements for children at age 2 years were included when such data were available. Preterm infants (n =289), term twins(n =52), post-term infants(n =11) and term infants with congenital defect (n=30) were excluded. There were 21.2% (2268/7456) infants eligible for analysis. Of these, we observed 85.9% (1949/2268) children from birth to age two years till September 1st 2015 (Figure 1). To assess potential selection bias, we compared demographics and birth characteristics of the analytic sample (n=2268) to the excluded healthy singleton infants (n=4806). There were no substantial differences in sex, birthweight, maternal age or overweight and obese rates at age 2 years of the two samples. (Supplemental Table 1)

### Anthropometric measures

Weight and length of children were measured by the same type of instruments at the community health centers. Weight for infants (0-18months) was measured by an electronic pediatric scale (SECA 376 Weighing Scale) to the nearest 0.005 kg. Weight for toddlers (19-24months) was measured by another type of scale (SECA 704c Weighing Scale) to the nearest 0.05kg. Recumbent length was measured from the top of the head to soles of feet using an infant mat (SECA416 Mobile Measuring Mat) to the nearest 0.1 cm. BMI z-score (BAZ) of children at age two years were calculated according to the 2006 World Health Organization (WHO) Child Growth Standards using the WHO Anthro 2009 software.<sup>(28)</sup>The

1  
2  
3 WHO Child Growth Standards was based on a multi-country study involving breastfed  
4 children from six geographically distinct sites.<sup>(5)</sup> Overweight was defined as BAZ > +1  
5 (BMI >85th percentile) while obesity was defined as BAZ>+2 (BMI >97th percentile). Normal  
6 weight was defined as  $-1 \leq BAZ \leq +1$ .<sup>(1, 13)</sup> Based on reports from previous studies,<sup>(11, 12, 19, 21)</sup>  
7 we extracted factors associated with childhood overweight from the electronic medical  
8 records. These factors were birthweight, sex, delivery mode, maternal ages, duration of  
9 breastfeeding and sleeping data. Parents recalled to feeding and sleeping questions in  
10 follow-ups. They reported the age in months at which breastfeeding was stopped. Sleep  
11 duration in hours was recorded at age 2 years. Because this cohort was set up after birth,  
12 some information about pregnancy and parents information was not available.  
13  
14  
15  
16  
17  
18  
19  
20  
21  
22  
23

### 24 **BMI trajectory modeling**

25  
26 BMI peak was identified from subject-specific BMI growth curves established by serial BMI  
27 measurements. (Figure 2) A polynomial regression model with quadratic terms was fit to the  
28 BMI measurements over time. Regression modeling was used for each child to fit the  
29 following equation:<sup>(19)</sup>  
30  
31  
32  
33

$$34 \text{ BMI} = \beta_0 + \beta_1(\text{age in days}) + \beta_2(\text{age in days})^2$$

35  
36  
37  
38  
39  
40  
41 The first inflection point occurred at less than 408 days and identified as BMI peak was  
42 derived from the equation. The magnitude and timing of BMI peak could be found by taking  
43 derivatives as follows:  
44  
45  
46  
47

$$48 \text{ BMI}' = 2\beta_2(\text{age in days}) + \beta_1 = 0$$

49  
50  
51 Thus,

$$52 \text{ } T_{peak} = -\frac{\beta_1}{2\beta_2}$$

$$BMI_{peak} = \frac{4\beta_0 \beta_2 - \beta_1^2}{4\beta_2}$$

$T_{peak}$  is the timing of BMI peak and  $BMI_{peak}$  is the magnitude of BMI peak.

The pre-peak velocity was calculated using the following equation, with BMI at 14 days of age as the baseline measurement to avoid the period of neonatal weight loss seen in the first two weeks of life.<sup>(21)</sup>

$$(BMI_{Peak} - BMI_{14days}) / (T_{peak} - 14 \text{ days}).$$

The subjects who had a BMI peak within 14–408 days of life were defined as estimable (“fit”) BMI trajectories, while those who were not identifiable by the model were called inestimable (“not fit”) BMI trajectories.<sup>(19)</sup>

### Statistical analysis

SPSS 20.0 statistical software was used for all analyses and metalab2014b for the BMI trajectory modeling. Data were presented as mean with 95% confidence interval. Categorical data were summarized by calculating percentages. The chi-square test and two-sampled t tests were used to examine the differences between participants whose BMI trajectories were estimable or inestimable for the quadratic regression model and those who did or did not have measurements at age two years. We classified birthweight as the following categories: 1.5 to less than 2.5 kg, 2.5 to less than 4 kg, and greater than 4 kg in the chi-square test. (Table 1)

To evaluate the associations between covariates and infant BMI peak characteristics and childhood BMI Z-scores, bivariate analyses were used by one-way ANOVA with post hoc Bonferroni adjustments. (Table 2) BMI peak characteristics [age (in months) and magnitude (BMI; in kg/m<sup>2</sup>) at peak and pre-peak velocities (kg/m<sup>2</sup>/month)] were estimated. The correlations between the estimated BMI peak characteristics were assessed by Pearson correlation analysis. (Supplemental Table 2) Logistic regression was used to assess the

1  
2  
3 associations between BMI peak characteristics and childhood overweight (BAZ > +1) or  
4 obesity (BAZ > +2), adjusting for other background characteristics. Gender, delivery mode  
5 and maternal ages were defined as categorical variables. Birthweight, duration of  
6 breastfeeding and sleeping were defined as continuous variable. We derived  
7 birthweight-for-gestational-age z-scores using references from International standards for  
8 newborn.<sup>(29)</sup> (Table 3) Statistical analyses were performed using only the subjects with  
9 estimable BMI peak.<sup>(19-22)</sup> All statistical tests were two-tailed and P values <0.05 were  
10 considered statistically significant.  
11  
12  
13  
14  
15  
16  
17  
18  
19  
20  
21  
22  
23  
24  
25  
26  
27  
28  
29  
30  
31  
32  
33  
34  
35  
36  
37  
38  
39  
40  
41  
42  
43  
44  
45  
46  
47  
48  
49  
50  
51  
52  
53  
54  
55  
56  
57  
58  
59  
60



## Results

### Description of the study population

The demographic and independent variables of the study population are presented in Table 1. There were 2268 infants eligible for analysis, 49.6% male and 50.4% female. Most had a normal birthweight of 2.5 to less than 4 kg (n=2073, 91.4%). Eighty-five percent (n =1949) of infants had follow-up data at least through the age of 2 years (Table 1). Evaluated by the WHO Child Growth Standards, 17.0% (n =332) infants were overweight (BAZ > +1) and 2.3% (n =44) obese (BAZ > +2) at age 2 years.

### Results of infant BMI trajectory modeling

Individual BMI trajectories were estimable using the polynomial regression model for 91.4% of the sample, with reasonable fit (mean  $R^2=0.70\pm 0.23$ ). Mean magnitude of BMI peak was 18.33 (95% CI 18.26-18.39)  $\text{kg/m}^2$  and occurred at 7.61 (95% CI 7.55-7.67) months. (Supplemental Figure1) Those subjects with inestimable BMI peak mostly showed either a BMI peak after 408 days of life or a decrease in BMI after birth. The prevalence of macrosomia (birthweight>4kg) infants with inestimable infancy BMI peak were slightly higher than that with estimable ones (6.7% vs 11.3%,  $P=0.024$ ). Macrosomia born heavier reached their BMI peak much earlier, since some of them attained BMI peak measurements just after birth. There was no significant difference in other factors between subjects with estimable and inestimable peak BMI ( $P>0.05$ ). (Table 1)

### *Participants' characteristics in relation to infant BMI trajectories*

Infant BMI trajectories were related to both sex and birthweight (Table 2). The magnitude of BMI peak was greater, and timing of peak BMI was earlier, in boys than in girls and in children of higher birthweight than those of lower birthweight. There was no statistical significant difference in pre-peak velocities with regards to infant characteristics.

### **General characteristics of children at age two years**

We tested for differences between infants who had BMI data with estimable BMI peak at age two years (n=1790) vs. those who did not (n=159). There was no difference between the two groups in sex, birthweight, maternal age, duration of breastfeeding, duration of sleep and overweight rates at age 2 years. ( $P > 0.05$ ).

### **Association between infant BMI peak and childhood overweight and obesity**

Table 3 shows the results of the association between BMI peak and risk of overweight and obesity at two years of age. When only the infant BMI peak was included in the model, higher magnitude and later timing of infant BMI peak increased the risk of overweight at two years. Furthermore, after adjustment for other infant background factors, higher magnitude (OR 3.11; 95% CI 2.64–3.66) and later timing (OR 1.35; 95% CI 1.21-1.50) of infant BMI peak each increased the risk of overweight at two years. The results were also similar with regards to childhood obesity (Table 3).

## Discussion

Using a longitudinal data from a community-based cohort, we have demonstrated in the current analysis that infant BMI peak is useful for predicting childhood overweight and obesity in urban China. Boys had a higher average BMI peak and earlier average timing than girls. Principally, our results show that higher magnitude and later timing of infant BMI peak were each associated with increased risk of early childhood overweight and obesity.

This is the first community-based cohort study in China to characterize infant BMI peak and evaluate its association with risk of early childhood overweight and obesity. Overweight and obesity increased remarkably both in rural and urban areas of China.<sup>(30)</sup> Our findings are therefore generalizable to children of similar age in Shanghai city, and to some degree by extension to other areas in China. The used data were routinely collected by the health centers where children are offered routine healthcare, such as immunization and physical examination; thus constitute a valid and reliable data set for addressing the study questions. The longitudinal nature of the cohort and the repeated measurements of length and weight parameters provided us with the opportunity to carefully model the BMI trajectories of infants. One limitation of our investigation was that only about 69.9% (7456/10674) of all children in this age range had health records and 85.9% of eligible children had complete follow-up data up to the age 2 years, meaning that those with incomplete data were excluded from analysis and risk of selection bias may not be totally ruled out. Another weakness of the study is that the data of parent's BMI, pregnancy weight gain, gestational diabetes mellitus and income were not available, the reason being that the cohort was set up after birth and not prenatally. Thirdly, the BMI peak is estimation and not the true peak. A potential problem of using estimated BMI peak relates to the uncertainty in subsequent regression models.<sup>(18)</sup>

So far, few studies have been conducted on the utility of infant BMI peak for predicting childhood overweight and obesity.<sup>(19-21)</sup> The principal finding of our study that higher

1  
2  
3 magnitude and later timing of infant BMI peak were each associated with increased risk of  
4 early childhood overweight and obesity is similar to previous research from the CHOP study  
5 conducted in USA<sup>(19)</sup> and the Uppsala Family Study in Europe.<sup>(20)</sup> However, some findings of  
6 the current study are not consistent with previous research. A 2010 prospective cohort show  
7 that more rapid increases in weight for length in the first six months of life were associated  
8 with sharply increased risk of childhood obesity.<sup>(31)</sup> Most previous studies used weight or BMI  
9 at study-dependent fixed ages<sup>(31, 32)</sup> while ours was based on longitudinal and repeated  
10 measures of length and weight. Our results also demonstrate that sex and birthweight  
11 differences were shown in magnitude and timing of the peak but not in pre-peak velocity.<sup>(19, 21)</sup>  
12 In some recent studies, later BMI peak was found for both girls and boys (8-9 months of age)  
13 in European or American populations.<sup>(20, 21, 23)</sup> Girls peaked slightly later than boys in both  
14 populations. However, one recent study conducted in Singapore suggests that Asian children  
15 peak earlier (6 months) and that sex does not significantly influence age at peak in Asian  
16 infants. Different modeling methods could account for the observed differences in BMI peak  
17 characteristics across populations.<sup>(18)</sup> The effect of breastfeeding might also explain the  
18 different age of BMI peak across genders and populations. Further research is needed to  
19 demonstrate the clinical relevance of the small differences. Furthermore, an earlier and  
20 higher BMI peak was found to be positively associated with birthweight.<sup>(19, 20)</sup> In our study,  
21 higher birthweight was not associated with a lower velocity, which was found by the CHOP  
22 study.<sup>(19)</sup>

23  
24  
25  
26  
27  
28  
29  
30  
31  
32  
33  
34  
35  
36  
37  
38  
39  
40  
41  
42  
43  
44  
45  
46  
47 There is no widely accepted method to model infant BMI peak, appropriate peak age range  
48 and the number and timing of serial measurements.<sup>(23)</sup> China is undergoing rapid social and  
49 economic developments with consequent improvement in nutritional status. Current  
50 estimates indicate that overweight and obesity are rising in China, including among children.<sup>(4)</sup>  
51  
52  
53  
54 However, given the lack of studies evaluating the utility of BMI peak for predicting later  
55 childhood overweight and obesity in China, as has been demonstrated in other contexts and  
56  
57  
58  
59  
60

1  
2  
3 shown to be ancestry-specific,<sup>(19)</sup> it is therefore necessary to undertake such assessment,  
4 which will be useful in predicting early onset of obesity and serve as a springboard for  
5 planning appropriate interventions targeted at reducing the increasing trend of childhood  
6 overweight and obesity in urban China. It is unclear why infants in our study had earlier BMI  
7 peaks as (7-8 months) compared to infants from America and Europe (8-9 months),<sup>(20, 21, 23)</sup>  
8 but as been demonstrated, such differences may reflect possible ancestry-specific BMI peaks  
9 across populations; therefore cross-cultural evaluations are required to ascertain the validity  
10 of this assertion. Understanding these differences may help design the protocol of public  
11 health interventions to control childhood obesity.<sup>(33-35)</sup>  
12  
13  
14  
15  
16  
17  
18  
19  
20  
21  
22  
23  
24

25 The principal finding of the current study suggests that infant BMI peak is useful in predicting  
26 future risk of overweight and obesity in children in urban China; therefore infancy represents  
27 a critical window of opportunity for the prevention of the emerging overweight and obesity  
28 epidemic in children.  
29  
30  
31  
32  
33  
34  
35  
36  
37  
38

## 39 **Conclusion**

40  
41  
42 Using a community-based longitudinal cohort study with repeated measurements of infant  
43 growth parameters, we have for the first time determined that infant BMI peak is valuable for  
44 predicting early childhood overweight and obesity in urban China. Further studies are  
45 required for other infant populations in different areas of China.  
46  
47  
48  
49

## 50 **Acknowledgements**

51  
52  
53  
54 We are grateful to the staff in Jing'an maternal and child health care center for data extraction.  
55  
56 We also acknowledge all children and their parent's for participation.  
57  
58  
59  
60

### **Authors' contributions**

JieSun, Bright I Nwaru, and ZhuochunWu were responsible for the study design, analysis of the study and approval of the submitted and final version. Jing Hua and Xiaohong Li analyzed the data, interpreted the results and commented on the manuscript.

### **Funding**

This study was funded by National Natural Science Foundation of China [71573049].

### **Ethics Approval**

All procedures performed in this study were in accordance with the ethical standard. We gained approval (IRB#2015-TYSQ-03-11) for the current study from the Medical Research Ethics Committee, School of Public Health, Fudan University. Informed consent was obtained from all individual participants included in the study.

### **Competing interests**

The authors declare that they have no conflict of interest.

### **Data Sharing Statement**

No additional data are available.

**References:**

1. Benjamin Neelon SE, Schou Andersen C, Schmidt Morgen C, Kamper-Jorgensen M, Oken E, Gillman MW, et al. Early child care and obesity at 12 months of age in the Danish National Birth Cohort. *International journal of obesity* (2005). 2015;39(1):33-8.
2. Freedman DS, Mei Z, Srinivasan SR, Berenson GS, Dietz WH. Cardiovascular risk factors and excess adiposity among overweight children and adolescents: the Bogalusa Heart Study. *The Journal of pediatrics*. 2007;150(1):12-7.e2.
3. Skinner AC, Perrin EM, Skelton JA. Prevalence of obesity and severe obesity in US children, 1999-2014. *Obesity (Silver Spring, Md)*. 2016;24(5):1116-23.
4. Ji CY. Report on childhood obesity in China (4) prevalence and trends of overweight and obesity in Chinese urban school-age children and adolescents, 1985-2000. *Biomedical and environmental sciences : BES*. 2007;20(1):1-10.
5. Commission presents its final report, calling for high-level action to address major health challenge. Available from <http://www.who.int/end-childhood-obesity/news/launch-final-report/en/>. 2016.
6. Commission. CNhaFP. National Report on Nutritional status of children aged 0-6 year. China:National health and Family Planning Commission. China;. 2012.
7. Andersen LG, Holst C, Michaelsen KF, Baker JL, Sorensen TI. Weight and weight gain during early infancy predict childhood obesity: a case-cohort study. *International journal of obesity* (2005). 2012;36(10):1306-11.
8. Baird J, Fisher D, Lucas P, Kleijnen J, Roberts H, Law C. Being big or growing fast: systematic review of size and growth in infancy and later obesity. *BMJ (Clinical research ed)*. 2005;331(7522):929.
9. Leunissen RW, Kerkhof GF, Stijnen T, Hokken-Koelega A. Timing and tempo of first-year rapid growth in relation to cardiovascular and metabolic risk profile in early adulthood. *Jama*. 2009;301(21):2234-42.
10. Monteiro PO, Victora CG. Rapid growth in infancy and childhood and obesity in later life--a systematic review. *Obesity reviews : an official journal of the International Association for the Study of Obesity*. 2005;6(2):143-54.
11. Weng SF, Redsell SA, Swift JA, Yang M, Glazebrook CP. Systematic review and meta-analyses of risk factors for childhood overweight identifiable during infancy. *Archives of disease in childhood*. 2012;97(12):1019-26.
12. Guo Y. Growth level of urban Chinese infants from birth to 2 years, body mass index Z scores' predicting model and its age trajectory in relation to maternal pre-pregnancy body weight status. 2013.
13. Ma JQ, Zhou LL, Hu YQ, Liu SS, Sheng XY. Association between feeding practices and weight status in young children. *BMC pediatrics*. 2015;15:97.
14. Gortmaker SL, Swinburn BA, Levy D, Carter R, Mabry PL, Finegood DT, et al. Changing the future of obesity: science, policy, and action. *Lancet (London, England)*. 2011;378(9793):838-47.

- 1  
2  
3 15. Robinson SM, Crozier SR, Harvey NC, Barton BD, Law CM, Godfrey KM, et al.  
4 Modifiable early-life risk factors for childhood adiposity and overweight: an analysis of  
5 their combined impact and potential for prevention. *The American journal of clinical*  
6 *nutrition*. 2015;101(2):368-75.  
7  
8 16. Kolsgaard ML, Joner G, Brunborg C, Anderssen SA, Tonstad S, Andersen LF.  
9 Reduction in BMI z-score and improvement in cardiometabolic risk factors in obese  
10 children and adolescents. *The Oslo Adiposity Intervention Study - a hospital/public*  
11 *health nurse combined treatment*. *BMC pediatrics*. 2011;11:47.  
12  
13 17. Sijtsma A, Bocca G, L'Abée C, Liem ET, Sauer PJ, Corpeleijn E. Waist-to-height ratio,  
14 waist circumference and BMI as indicators of percentage fat mass and cardiometabolic  
15 risk factors in children aged 3-7 years. *Clinical nutrition (Edinburgh, Scotland)*.  
16 2014;33(2):311-5.  
17  
18 18. Aris IM, Bernard JY, Chen LW, Tint MT, Pang WW, Lim WY, et al. Infant body mass  
19 index peak and early childhood cardio-metabolic risk markers in a multi-ethnic Asian  
20 birth cohort. *International journal of epidemiology*. 2016.  
21  
22 19. Roy SM, Chesi A, Mentch F, Xiao R, Chiavacci R, Mitchell JA, et al. Body mass index  
23 (BMI) trajectories in infancy differ by population ancestry and may presage disparities  
24 in early childhood obesity. *The Journal of clinical endocrinology and metabolism*.  
25 2015;100(4):1551-60.  
26  
27 20. Silverwood RJ, De Stavola BL, Cole TJ, Leon DA. BMI peak in infancy as a predictor  
28 for later BMI in the Uppsala Family Study. *International journal of obesity (2005)*.  
29 2009;33(8):929-37.  
30  
31 21. Jensen SM, Ritz C, Ejlerskov KT, Molgaard C, Michaelsen KF. Infant BMI peak,  
32 breastfeeding, and body composition at age 3 y. *The American journal of clinical*  
33 *nutrition*. 2015;101(2):319-25.  
34  
35 22. WHO Multicentre Growth Reference Study Group. WHO Child Growth Standards:  
36 Length/height-for-age, Weight-for-age, Weight-for-length, Weight-for-height, and Body  
37 Mass Index-for-age: Methods and Development. Geneva:World Health  
38 Organization,2006. Available from: <http://www.who.int/childgrowth/standards/en/>.  
39 2006.  
40  
41 23. Wen X, Kleinman K, Gillman MW, Rifas-Shiman SL, Taveras EM. Childhood body  
42 mass index trajectories: modeling, characterizing, pairwise correlations and  
43 socio-demographic predictors of trajectory characteristics. *BMC medical research*  
44 *methodology*. 2012;12:38.  
45  
46 24. Chivers P, Hands B, Parker H, Bulsara M, Beilin LJ, Kendall GE, et al. Body mass index,  
47 adiposity rebound and early feeding in a longitudinal cohort (Raine Study).  
48 *International journal of obesity (2005)*. 2010;34(7):1169-76.  
49  
50 25. Johnson W, Choh AC, Lee M, Towne B, Czerwinski SA, Demerath EW.  
51 Characterization of the infant BMI peak: sex differences, birth year cohort effects,  
52 association with concurrent adiposity, and heritability. *American journal of human*  
53 *biology : the official journal of the Human Biology Council*. 2013;25(3):378-88.  
54  
55 26. Giles LC, Whitrow MJ, Davies MJ, Davies CE, Rumbold AR, Moore VM. Growth  
56  
57  
58  
59  
60



- trajectories in early childhood, their relationship with antenatal and postnatal factors, and development of obesity by age 9 years: results from an Australian birth cohort study. *International journal of obesity* (2005). 2015;39(7):1049-56.
27. Sovio U, Kaakinen M, Tzoulaki I, Das S, Ruokonen A, Pouta A, et al. How do changes in body mass index in infancy and childhood associate with cardiometabolic profile in adulthood? Findings from the Northern Finland Birth Cohort 1966 Study. *International journal of obesity* (2005). 2014;38(1):53-9.
28. WHO. Anthro for personal computers, version 3. Software for assessing growth and development of the world's children. Geneva: WHO,2009. Available from: <http://www.who.int/childgrowth/software/en/>. 2009.
29. Villar J, Cheikh Ismail L, Victora CG, Ohuma EO, Bertino E, Altman DG, et al. International standards for newborn weight, length, and head circumference by gestational age and sex: the Newborn Cross-Sectional Study of the INTERGROWTH-21st Project. *Lancet* (London, England). 2014;384(9946):857-68.
30. Zhang YX, Wang SR. Rural-urban comparison in prevalence of overweight and obesity among adolescents in Shandong, China. *Annals of human biology*. 2013;40(3):294-7.
31. Taveras EM, Rifas-Shiman SL, Belfort MB, Kleinman KP, Oken E, Gillman MW. Weight status in the first 6 months of life and obesity at 3 years of age. *Pediatrics*. 2009;123(4):1177-83.
32. Guo B, Mei H, Yang S, Zhang J. [Prenatal factors associated with high BMI status of infants and toddlers]. *Zhonghua er ke za zhi = Chinese journal of pediatrics*. 2014;52(6):464-7.
33. Taveras EM, Gillman MW, Kleinman K, Rich-Edwards JW, Rifas-Shiman SL. Racial/ethnic differences in early-life risk factors for childhood obesity. *Pediatrics*. 2010;125(4):686-95.
34. Taveras EM, Gillman MW, Kleinman KP, Rich-Edwards JW, Rifas-Shiman SL. Reducing racial/ethnic disparities in childhood obesity: the role of early life risk factors. *JAMA pediatrics*. 2013;167(8):731-8.
35. Zilanawala A, Davis-Kean P, Nazroo J, Sacker A, Simonton S, Kelly Y. Race/ethnic disparities in early childhood BMI, obesity and overweight in the United Kingdom and United States. *International journal of obesity* (2005). 2015;39(3):520-9.

**Table 1** Participants' characteristics by subjects with "estimable"\* and "inestimable"# BMI peak

| Characteristics                                | n          | Estimable*, n (%)            | Inestimable#, n (%) |
|------------------------------------------------|------------|------------------------------|---------------------|
| Total number                                   | 2268       | 2073                         | 195                 |
| Gender                                         |            |                              |                     |
| Male                                           | 1126       | 1022 (49.3)                  | 104 (53.3)          |
| Female                                         | 1142       | 1051 (50.7)                  | 91 (46.7)           |
| Birth weight                                   |            |                              |                     |
| 1.5 to <2.5kg                                  | 35         | 30 (1.4)                     | 5 (2.6)             |
| 2.5 to <4.0kg                                  | 2073       | 1905 (91.9)                  | 168 (86.2)          |
| <b>≥4kg</b>                                    | <b>160</b> | <b>138 (6.7)<sup>a</sup></b> | <b>22 (11.3)</b>    |
| Delivery mode                                  |            |                              |                     |
| Vaginal birth                                  | 1086       | 989 (47.7)                   | 97 (49.7)           |
| Cesarean section                               | 1182       | 1084 (52.3)                  | 98 (50.3)           |
| Maternal Age                                   |            |                              |                     |
| >35y                                           | 176        | 159 (7.7)                    | 17 (8.7)            |
| ≤35y                                           | 2092       | 1914 (92.3)                  | 178 (91.3)          |
| Total number with data at age 2y               | 1949       | 1790 (86.3)                  | 159 (81.5)          |
| Total number of overweight and obese at age 2y | 332        | 313 (17.5)                   | 19 (11.9)           |
| Total number of obese at age 2y                | 44         | 43 (2.4)                     | 1 (0.6)             |

a.P<0.05

\*Estimable: fit and identifiable BMI peak within 14–408 days of life.

# Inestimable: Not fit and identifiable.

Chi-square tests were used to examine the differences between Estimable or Inestimable group.

**Table 2 Infant characteristics in relation to infant BMI peak trajectories**

|                  |                                      | Magnitude(kg/m <sup>2</sup> ),<br>Mean (95% CI) | Age(months),<br>Mean (95% CI)      | Pre-peak<br>velocities(kg/m <sup>2</sup><br>/month)<br>Mean (95% CI) |
|------------------|--------------------------------------|-------------------------------------------------|------------------------------------|----------------------------------------------------------------------|
| Total            | n=2073                               | 18.33(18.26-18.39)                              | 7.61(7.55-7.67)                    | 0.43(0.42-0.44)                                                      |
| Gender           |                                      |                                                 |                                    |                                                                      |
|                  | <b>male (n=1022)</b>                 | <b>18.60(18.21-18.69)<sup>a</sup></b>           | <b>7.54(7.46-7.63)<sup>b</sup></b> | 0.42(0.41-0.43)                                                      |
|                  | female (n=1051)                      | 18.07(17.98-18.16)                              | 7.67(7.59-7.76)                    | 0.43(0.42-0.44)                                                      |
| Birth<br>Weight  |                                      |                                                 |                                    |                                                                      |
|                  | 1.5 to<br><2.5kg(n=30)               | 17.63(17.13-18.13)                              | 8.13(7.56-8.70)                    | 0.44(0.35-0.53)                                                      |
|                  | 2.5 to<br><4.0kg(n=1905)             | 18.27(18.21-18.34)                              | 7.63(7.57-7.70)                    | 0.43(0.42-0.44)                                                      |
|                  | <b>&gt;=4kg(n=138)</b>               | <b>19.25(18.97-19.52)<sup>b</sup></b>           | <b>7.11(6.88-7.34)<sup>a</sup></b> | 0.39(0.35-0.42)                                                      |
| Delivery<br>Mode |                                      |                                                 |                                    |                                                                      |
|                  | Vaginal birth<br>(n=989)             | 18.24(18.14-18.34)                              | 7.64(7.56-7.73)                    | 0.43(0.42-0.44)                                                      |
|                  | <b>Cesarean section<br/>(n=1084)</b> | <b>18.41(18.32-18.50)<sup>a</sup></b>           | 7.58(7.49-7.66)                    | 0.43(0.42-0.44)                                                      |
| Maternal<br>Age  |                                      |                                                 |                                    |                                                                      |
|                  | >35y(n=159)                          | 18.42(18.18-18.66)                              | 7.61(7.49-7.82)                    | 0.44(0.41-0.48)                                                      |
|                  | <=35y(n=1914)                        | 18.32(18.25-18.39)                              | 7.61(7.55-7.67)                    | 0.42(0.41-0.43)                                                      |

a.P<0.001 b.P<0.05

The analysis includes only infants who had BMI peak within 0-408 days and whose BMI trajectories were estimable by the quadratic model.

Bivariate comparison was performed using one-way ANOVA with post hoc Bonferroni multiple comparison test.

**Table 3 Association between BMI peak characteristics and overweight and obesity at age 2 years**

| Model                                         | Overweight at 2y (n=1790 )                             |                                              | Obesity at 2y (n=1790 )                                      |                                              |
|-----------------------------------------------|--------------------------------------------------------|----------------------------------------------|--------------------------------------------------------------|----------------------------------------------|
|                                               | containing infant BMI trajectory characteristics alone | Initial model plus all independent variables | Model containing infant BMI trajectory characteristics alone | Initial model plus all independent variables |
|                                               | OR (95% CI)                                            | OR (95% CI)                                  | OR (95% CI)                                                  | OR (95% CI)                                  |
| Magnitude(kg/m <sup>2</sup> )                 | <b>2.94(2.54-3.40)<sup>a</sup></b>                     | <b>3.11(2.64-3.66)<sup>a</sup></b>           | <b>2.76(2.11-3.60)<sup>a</sup></b>                           | <b>2.69(2.00-3.61)<sup>a</sup></b>           |
| Age (months)                                  | <b>1.36(1.23-1.51)<sup>a</sup></b>                     | <b>1.35(1.21-1.50)<sup>a</sup></b>           | <b>1.33(1.08-1.65)<sup>b</sup></b>                           | <b>1.35(1.08-1.68)<sup>b</sup></b>           |
| Pre-peak velocities(kg/m <sup>2</sup> /month) | <b>0.17(0.07-0.40)<sup>a</sup></b>                     | <b>0.14(0.06-0.34)<sup>a</sup></b>           | <b>0.10(0.02-0.56)<sup>b</sup></b>                           | <b>0.12(0.02-0.74)<sup>c</sup></b>           |
| male(vs female)                               |                                                        | <b>0.67(0.49-0.90)<sup>b</sup></b>           |                                                              | 0.99(0.51-1.96)                              |
| birth weight z score,(continuous)             |                                                        | 1.06(0.89-1.26)                              |                                                              | 1.24(0.84-1.82)                              |
| Duration of breastfeeding(continuous)         |                                                        | 0.97(0.93-1.01)                              |                                                              | 0.92(0.84-1.01)                              |
| Duration of Sleep(continuous)                 |                                                        | 0.89(0.77-1.02)                              |                                                              | 0.89(0.63-1.24)                              |
| Cesarean section(vs Vaginal Birth)            |                                                        | 1.08(0.81-1.44)                              |                                                              | 0.80(0.42-1.54)                              |
| Mother Age(>35y vs<=35y)                      |                                                        | 0.68(0.38-1.21)                              |                                                              | 0.74(0.21-2.59)                              |

a.P<0.001 b.P<0.01 c.P<0.05

The analysis includes only infants who had BMI peak within 0-408 days and whose BMI trajectories were estimable by the quadratic model.

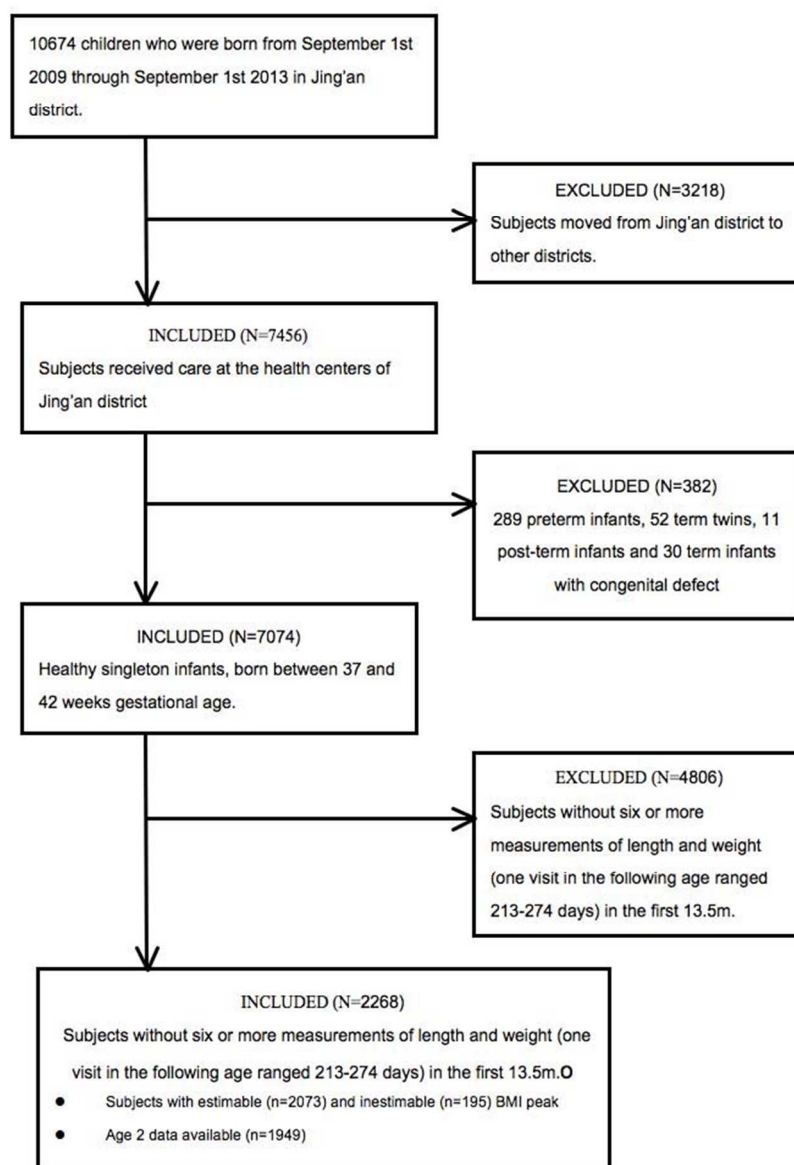

Figure1 Recruitment flow chart and study sample

64x83mm (300 x 300 DPI)

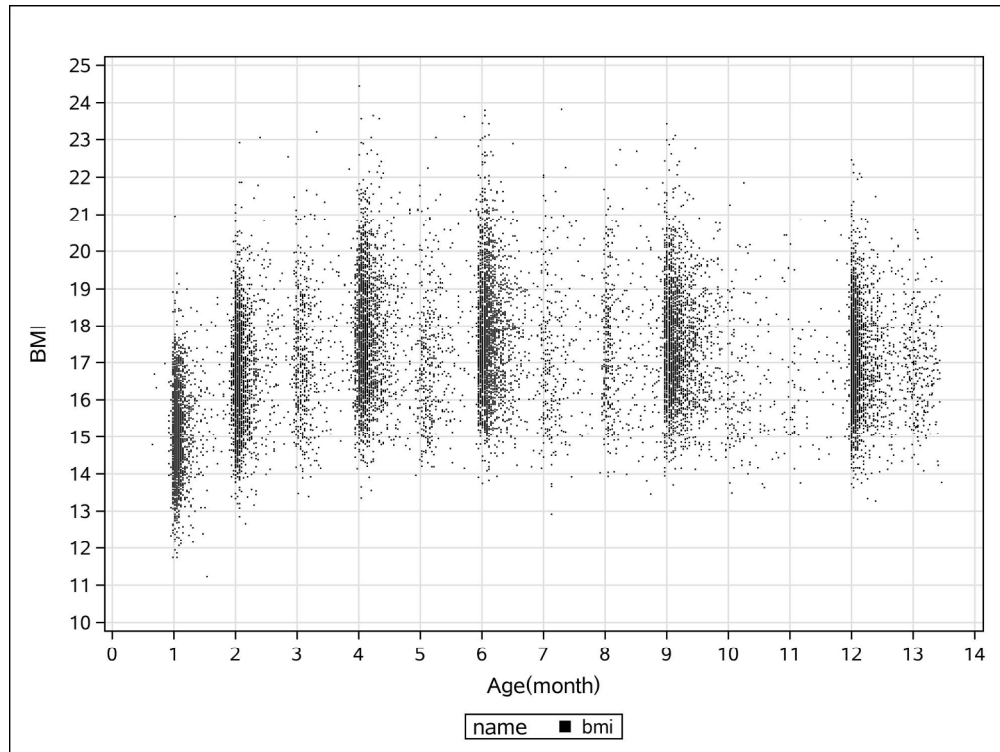

Figure 2 Plot of BMI data by age from birth to 13.5 months

169x127mm (300 x 300 DPI)

**Supplemental Table 1 Characteristics of the analytic and excluded healthy singleton infants**

| Characteristics                                | n           | Included, n (%)                | Excluded, n (%)    |
|------------------------------------------------|-------------|--------------------------------|--------------------|
| Total number                                   | 7074        | 2268(32.1)                     | 4806(67.9)         |
| Gender                                         |             |                                |                    |
| Male                                           | 3468        | 1126 (49.6)                    | 2342 (48.7)        |
| Female                                         | 3606        | 1142(50.4)                     | 2464 (51.3)        |
| Birth weight                                   |             |                                |                    |
| <4.0kg                                         | 6609        | 2108(92.9)                     | 4501 (93.7)        |
| ≥4kg                                           | 465         | 160 (7.1)                      | 305(6.3)           |
| Maternal Age                                   |             |                                |                    |
| >35y                                           | 570         | 176 (7.8)                      | 394 (8.2)          |
| ≤35y                                           | 6504        | 2092(92.2)                     | 4412(91.8)         |
| Total number with data at age 2y               | <b>1949</b> | <b>1949 (85.9)<sup>a</sup></b> | <b>2282 (47.4)</b> |
| Total number of overweight and obese at age 2y | 751         | 330 (16.9)                     | 421 (18.4)         |
| Total number of obese at age 2y                | 99          | 44 (2.3)                       | 55(2.4)            |

a.P<0.05

Chi-square tests were used to examine the differences between included or excluded group.

**Supplemental Table 2: Correlation matrix of infancy BMI characteristics**

|                              | Age of BMI Peak, mo | Pre-peak velocities, kg/m2/mo |
|------------------------------|---------------------|-------------------------------|
| Magnitude of BMI peak, kg/m2 | 0.03                | 0.654**                       |
| Age of BMI Peak, mo          |                     | 0.09**                        |

Significance is noted as: \*\*  $p \leq 0.01$ .

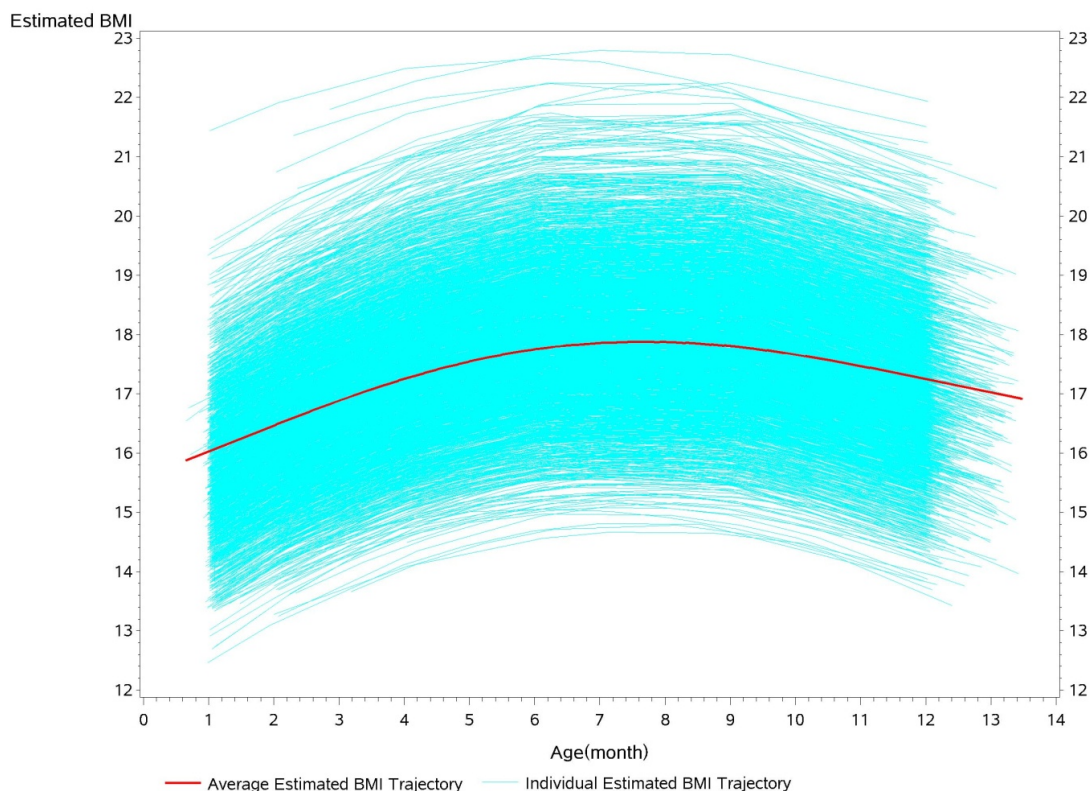

**Supplemental Figure1 Infant Estimated BMI trajectory by polynomial regression model**

Only



**STROBE 2007 (v4) checklist of items to be included in reports of observational studies in epidemiology\***  
**Checklist for cohort, case-control, and cross-sectional studies (combined)**

| Section/Topic             | Item # | Recommendation                                                                                                                                                                                                                                                                                                                                                                                                                                                         | Reported on page # |
|---------------------------|--------|------------------------------------------------------------------------------------------------------------------------------------------------------------------------------------------------------------------------------------------------------------------------------------------------------------------------------------------------------------------------------------------------------------------------------------------------------------------------|--------------------|
| Title and abstract        | 1      | (a) Indicate the study's design with a commonly used term in the title or the abstract                                                                                                                                                                                                                                                                                                                                                                                 | 1                  |
|                           |        | (b) Provide in the abstract an informative and balanced summary of what was done and what was found                                                                                                                                                                                                                                                                                                                                                                    | 1                  |
| <b>Introduction</b>       |        |                                                                                                                                                                                                                                                                                                                                                                                                                                                                        |                    |
| Background/rationale      | 2      | Explain the scientific background and rationale for the investigation being reported                                                                                                                                                                                                                                                                                                                                                                                   | 2                  |
| Objectives                | 3      | State specific objectives, including any pre-specified hypotheses                                                                                                                                                                                                                                                                                                                                                                                                      | 3                  |
| <b>Methods</b>            |        |                                                                                                                                                                                                                                                                                                                                                                                                                                                                        |                    |
| Study design              | 4      | Present key elements of study design early in the paper                                                                                                                                                                                                                                                                                                                                                                                                                | 4                  |
| Setting                   | 5      | Describe the setting, locations, and relevant dates, including periods of recruitment, exposure, follow-up, and data collection                                                                                                                                                                                                                                                                                                                                        | 3-4, Figure 1      |
| Participants              | 6      | (a) <i>Cohort study</i> —Give the eligibility criteria, and the sources and methods of selection of participants. Describe methods of follow-up<br><i>Case-control study</i> —Give the eligibility criteria, and the sources and methods of case ascertainment and control selection. Give the rationale for the choice of cases and controls<br><i>Cross-sectional study</i> —Give the eligibility criteria, and the sources and methods of selection of participants | 5                  |
|                           |        | (b) <i>Cohort study</i> —For matched studies, give matching criteria and number of exposed and unexposed<br><i>Case-control study</i> —For matched studies, give matching criteria and the number of controls per case                                                                                                                                                                                                                                                 | 5                  |
| Variables                 | 7      | Clearly define all outcomes, exposures, predictors, potential confounders, and effect modifiers. Give diagnostic criteria, if applicable                                                                                                                                                                                                                                                                                                                               | 5-8                |
| Data sources/ measurement | 8*     | For each variable of interest, give sources of data and details of methods of assessment (measurement). Describe comparability of assessment methods if there is more than one group                                                                                                                                                                                                                                                                                   | 6-8                |
| Bias                      | 9      | Describe any efforts to address potential sources of bias                                                                                                                                                                                                                                                                                                                                                                                                              | 6                  |
| Study size                | 10     | Explain how the study size was arrived at                                                                                                                                                                                                                                                                                                                                                                                                                              | 6, Figure 1        |
| Quantitative variables    | 11     | Explain how quantitative variables were handled in the analyses. If applicable, describe which groupings were chosen and why                                                                                                                                                                                                                                                                                                                                           | 8                  |
| Statistical methods       | 12     | (a) Describe all statistical methods, including those used to control for confounding                                                                                                                                                                                                                                                                                                                                                                                  | 8-9                |
|                           |        | (b) Describe any methods used to examine subgroups and interactions                                                                                                                                                                                                                                                                                                                                                                                                    | 8                  |
|                           |        | (c) Explain how missing data were addressed                                                                                                                                                                                                                                                                                                                                                                                                                            | 6                  |
|                           |        | (d) <i>Cohort study</i> —If applicable, explain how loss to follow-up was addressed<br><i>Case-control study</i> —If applicable, explain how matching of cases and controls was addressed                                                                                                                                                                                                                                                                              | 6                  |

|                          |     |                                                                                                                                                                                                              |                               |
|--------------------------|-----|--------------------------------------------------------------------------------------------------------------------------------------------------------------------------------------------------------------|-------------------------------|
|                          |     | <i>Cross-sectional study</i> —If applicable, describe analytical methods taking account of sampling strategy                                                                                                 |                               |
|                          |     | (e) Describe any sensitivity analyses                                                                                                                                                                        |                               |
| <b>Results</b>           |     |                                                                                                                                                                                                              |                               |
| Participants             | 13* | (a) Report numbers of individuals at each stage of study—eg numbers potentially eligible, examined for eligibility, confirmed eligible, included in the study, completing follow-up, and analysed            | Figure 1                      |
|                          |     | (b) Give reasons for non-participation at each stage                                                                                                                                                         | 6                             |
|                          |     | (c) Consider use of a flow diagram                                                                                                                                                                           | Figure 1                      |
| Descriptive data         | 14* | (a) Give characteristics of study participants (eg demographic, clinical, social) and information on exposures and potential confounders                                                                     | Table 1                       |
|                          |     | (b) Indicate number of participants with missing data for each variable of interest                                                                                                                          | Table 1, Supplemental Table 1 |
|                          |     | (c) <i>Cohort study</i> —Summarise follow-up time (eg, average and total amount)                                                                                                                             | 5                             |
| Outcome data             | 15* | <i>Cohort study</i> —Report numbers of outcome events or summary measures over time                                                                                                                          | 8                             |
|                          |     | <i>Case-control study</i> —Report numbers in each exposure category, or summary measures of exposure                                                                                                         |                               |
|                          |     | <i>Cross-sectional study</i> —Report numbers of outcome events or summary measures                                                                                                                           |                               |
| Main results             | 16  | (a) Give unadjusted estimates and, if applicable, confounder-adjusted estimates and their precision (eg, 95% confidence interval). Make clear which confounders were adjusted for and why they were included | Table 3                       |
|                          |     | (b) Report category boundaries when continuous variables were categorized                                                                                                                                    | 8                             |
|                          |     | (c) If relevant, consider translating estimates of relative risk into absolute risk for a meaningful time period                                                                                             |                               |
| Other analyses           | 17  | Report other analyses done—eg analyses of subgroups and interactions, and sensitivity analyses                                                                                                               |                               |
| <b>Discussion</b>        |     |                                                                                                                                                                                                              |                               |
| Key results              | 18  | Summarise key results with reference to study objectives                                                                                                                                                     | 11                            |
| Limitations              | 19  | Discuss limitations of the study, taking into account sources of potential bias or imprecision. Discuss both direction and magnitude of any potential bias                                                   | 11                            |
| Interpretation           | 20  | Give a cautious overall interpretation of results considering objectives, limitations, multiplicity of analyses, results from similar studies, and other relevant evidence                                   | 11-12                         |
| Generalisability         | 21  | Discuss the generalisability (external validity) of the study results                                                                                                                                        | 13                            |
| <b>Other information</b> |     |                                                                                                                                                                                                              |                               |
| Funding                  | 22  | Give the source of funding and the role of the funders for the present study and, if applicable, for the original study on which the present article is based                                                | 15                            |

\*Give information separately for cases and controls in case-control studies and, if applicable, for exposed and unexposed groups in cohort and cross-sectional studies.

1  
2  
3  
4  
5  
6  
7  
8  
9  
10  
11  
12  
13  
14  
15  
16  
17  
18  
19  
20  
21  
22  
23  
24  
25  
26  
27  
28  
29  
30  
31  
32  
33  
34  
35  
36  
37  
38  
39  
40  
41  
42  
43  
44  
45  
46  
47  
48  
49

**Note:** An Explanation and Elaboration article discusses each checklist item and gives methodological background and published examples of transparent reporting. The STROBE checklist is best used in conjunction with this article (freely available on the Web sites of PLoS Medicine at <http://www.plosmedicine.org/>, Annals of Internal Medicine at <http://www.annals.org/>, and Epidemiology at <http://www.epidem.com/>). Information on the STROBE Initiative is available at [www.strobe-statement.org](http://www.strobe-statement.org).

For peer review only

# BMJ Open

## Infant BMI Peak as a predictor of overweight and obesity at age 2 years in a Chinese community-based cohort

|                                 |                                                                                                                                                                                                                                                                                                                                                                                                                                                                                                                                                                                                                                                                                                                                                                                                                 |
|---------------------------------|-----------------------------------------------------------------------------------------------------------------------------------------------------------------------------------------------------------------------------------------------------------------------------------------------------------------------------------------------------------------------------------------------------------------------------------------------------------------------------------------------------------------------------------------------------------------------------------------------------------------------------------------------------------------------------------------------------------------------------------------------------------------------------------------------------------------|
| Journal:                        | <i>BMJ Open</i>                                                                                                                                                                                                                                                                                                                                                                                                                                                                                                                                                                                                                                                                                                                                                                                                 |
| Manuscript ID                   | bmjopen-2016-015122.R2                                                                                                                                                                                                                                                                                                                                                                                                                                                                                                                                                                                                                                                                                                                                                                                          |
| Article Type:                   | Research                                                                                                                                                                                                                                                                                                                                                                                                                                                                                                                                                                                                                                                                                                                                                                                                        |
| Date Submitted by the Author:   | 16-Jul-2017                                                                                                                                                                                                                                                                                                                                                                                                                                                                                                                                                                                                                                                                                                                                                                                                     |
| Complete List of Authors:       | Sun, Jie; School of Public Health, Fudan, Department of Social Medicine; Jing'an Maternal and Child Health Care Center, Shanghai, Department of Child Health Care<br>Nwaru, Bright; The University Of Edinburgh, Allergy & Respiratory Research Group, Centre for Population Health Sciences; University of Tampere, School of Health Sciences<br>Hua, Jing; Shanghai First Maternity and Infant Hospital, Tongji University School of Medicine, Department of Maternal and Child Health Care<br>Li, Xiaohong; School of Public Health, Fudan University, Department of Health Policy and Management ; Innovation Center for Social Risk Governance in Health<br>Wu, Zhuochun; School of Public Health, Fudan University, Department of Social Medicine; Innovation Center for Social Risk Governance in Health |
| <b>Primary Subject Heading</b>: | Epidemiology                                                                                                                                                                                                                                                                                                                                                                                                                                                                                                                                                                                                                                                                                                                                                                                                    |
| Secondary Subject Heading:      | Paediatrics                                                                                                                                                                                                                                                                                                                                                                                                                                                                                                                                                                                                                                                                                                                                                                                                     |
| Keywords:                       | Overweight, Obesity, Body mass index, Longitudinal Study, Infant                                                                                                                                                                                                                                                                                                                                                                                                                                                                                                                                                                                                                                                                                                                                                |
|                                 |                                                                                                                                                                                                                                                                                                                                                                                                                                                                                                                                                                                                                                                                                                                                                                                                                 |

SCHOLARONE™  
Manuscripts

## Infant BMI peak as a predictor of overweight and obesity at age 2 years in a Chinese community-based cohort

Jie Sun<sup>1,2</sup>, Bright I Nwaru<sup>3,4,5</sup>, Jing Hua<sup>6</sup>, Xiaohong Li<sup>7,8</sup>, Zhuochun Wu<sup>1,8</sup>

### Abstract

**Objectives:** Infant body mass index (BMI) peak has proven to be a useful indicator for predicting childhood obesity risk in American and European populations. However, it has not been assessed in China. We characterized infant BMI trajectories in a Chinese longitudinal cohort and evaluated whether BMI peak can predict overweight and obesity at age 2 years.

**Methods:** Serial measurements (n=6-12) of weight and length were taken from healthy term infants (n=2073) in a birth cohort established in urban Shanghai. Measurements were used to estimate BMI growth curves from birth to 13.5 months using a polynomial regression model. BMI peak characteristics, including age (in months) and magnitude (BMI, in kg/m<sup>2</sup>) at peak and pre-peak velocities (in kg/m<sup>2</sup>/month), were estimated. The relationship between infant BMI peak and childhood BMI at age 2 years was examined using binary logistic analysis.

**Results:** Mean age at peak BMI was 7.61 months, with a magnitude of 18.33 kg/m<sup>2</sup>. Boys (n=1022) had a higher average peak BMI (18.60 vs. 18.07 kg/m<sup>2</sup>, P<0.001) and earlier average achievement of peak value (7.54 vs. 7.67 months, P<0.05) than girls (n=1051). With 1 kg/m<sup>2</sup> increase in peak BMI and one month increase in peak time, the risk of overweight at age 2 years increased by 2.11 times (OR 3.11; 95% CI 2.64-3.66) and 35% (OR 1.35; 95% CI 1.21-1.50), respectively. Similarly, higher BMI magnitude (OR 2.69; 95% CI 2.00-3.61) and later timing of infant BMI peak (OR 1.35; 95% CI 1.08-1.68) were associated with an increased risk of childhood obesity at age 2 years.

**Conclusions:** We have shown that infant BMI peak is valuable for predicting early childhood overweight and obesity in urban Shanghai. Because this is the first Chinese community-based cohort study of this nature, future research is required to examine infant populations in other areas of China.

**Key words:** Body mass Index, Obesity, Overweight, Longitudinal Study, Infants

**Word Count: 3883 words**

<sup>1</sup>Department of Social Medicine, School of Public Health, Fudan University, Shanghai, China.

<sup>2</sup>Department of Child Health Care, Jing'an Maternal and Child Health Care Center, Shanghai, China.

<sup>3</sup>School of Health Sciences, University of Tampere, Tampere, Finland.

<sup>4</sup>Asthma UK Centre for Applied Research, Usher Institute of Population Health Sciences and Informatics, University of Edinburgh, Edinburgh, UK.

<sup>5</sup>Krefting Research Centre, Institute of Medicine, University of Gothenburg, Gothenburg, Sweden

<sup>6</sup>Department of Maternal and Child Health Care, Shanghai First Maternity and Infant Hospital, Tongji University School of Medicine,

1  
2  
3 Shanghai, China.

4  
5 <sup>7</sup>Department of Health Policy and Management, School of Public Health, Fudan University, Shanghai,China.

6  
7 <sup>8</sup>Innovation Center for Social Risk Governance in Health, Fudan University, Shanghai, China

8  
9 Corresponding author: Zhuochun Wu, Department of Social Medicine, School of Public Health, Fudan University, Fax:  
10 086-021-62309139, P.O. Box 250,138 Yi Xue Yuan Road, Shanghai 200032, China . zcwu@shmu.edu.cn.

### 11 **Strengths and limitations of this study**

12  
13 We have demonstrated here for the first time that infant BMI peak is an effective predictor for childhood obesity  
14 in Shanghai, an urban city in China.

15  
16 The longitudinal cohort with careful repeated measurements of child growth parameters provided the  
17 opportunity to characterize infant BMI peak over the first year of life.

18  
19 As we lacked data on parent's BMI and pregnancy weight gain, we could ascertain the influence of these on  
20 infant BMI peak and contribution to childhood overweight and obesity.

21  
22 Selection bias may exist in our study because 14.1% of the infants that were measured did not complete the  
23 follow-up at 2 years old.

### 24 **Introduction**

25  
26  
27  
28  
29 The worldwide overweight prevalence among children aged under 5 years has risen from 4.8%  
30 in 1990 to 6.1% in 2014.<sup>(1)</sup> The current worldwide obesity epidemic is a serious public health  
31 crisis.<sup>(1-5)</sup> In 2014, almost half (48%) of obese individuals lived in Asia.<sup>(1)</sup> In urban areas of  
32 China, the prevalence of overweight increased from 5.3% in 2005 to 8.5% in 2010.<sup>(6)</sup> Rapid  
33 weight gain in early infancy is related to the adult development of obesity and cardiovascular  
34 risk factors, including hypertension and impaired glucose tolerance.<sup>(7-11)</sup> Environmental and  
35 behavioral factors are believed to be key drivers of obesity because although obesity is  
36 genetically influenced, genetic changes cannot explain the rapid increase in the prevalence  
37 of obesity.<sup>(12)</sup> Therapeutic interventions in adulthood have poor long-term effects and are not  
38 cost effective, therefore the introduction of primary preventive strategies during infancy may  
39 be more important to reduce the risk of being overweight and obese.<sup>(13-15)</sup>

40  
41  
42  
43  
44  
45  
46  
47  
48  
49  
50  
51  
52  
53  
54  
55  
56  
57  
58  
59  
60  
61  
62  
63  
64  
65  
66  
67  
68  
69  
70  
71  
72  
73  
74  
75  
76  
77  
78  
79  
80  
81  
82  
83  
84  
85  
86  
87  
88  
89  
90  
91  
92  
93  
94  
95  
96  
97  
98  
99  
100  
101  
102  
103  
104  
105  
106  
107  
108  
109  
110  
111  
112  
113  
114  
115  
116  
117  
118  
119  
120  
121  
122  
123  
124  
125  
126  
127  
128  
129  
130  
131  
132  
133  
134  
135  
136  
137  
138  
139  
140  
141  
142  
143  
144  
145  
146  
147  
148  
149  
150  
151  
152  
153  
154  
155  
156  
157  
158  
159  
160  
161  
162  
163  
164  
165  
166  
167  
168  
169  
170  
171  
172  
173  
174  
175  
176  
177  
178  
179  
180  
181  
182  
183  
184  
185  
186  
187  
188  
189  
190  
191  
192  
193  
194  
195  
196  
197  
198  
199  
200  
201  
202  
203  
204  
205  
206  
207  
208  
209  
210  
211  
212  
213  
214  
215  
216  
217  
218  
219  
220  
221  
222  
223  
224  
225  
226  
227  
228  
229  
230  
231  
232  
233  
234  
235  
236  
237  
238  
239  
240  
241  
242  
243  
244  
245  
246  
247  
248  
249  
250  
251  
252  
253  
254  
255  
256  
257  
258  
259  
260  
261  
262  
263  
264  
265  
266  
267  
268  
269  
270  
271  
272  
273  
274  
275  
276  
277  
278  
279  
280  
281  
282  
283  
284  
285  
286  
287  
288  
289  
290  
291  
292  
293  
294  
295  
296  
297  
298  
299  
300  
301  
302  
303  
304  
305  
306  
307  
308  
309  
310  
311  
312  
313  
314  
315  
316  
317  
318  
319  
320  
321  
322  
323  
324  
325  
326  
327  
328  
329  
330  
331  
332  
333  
334  
335  
336  
337  
338  
339  
340  
341  
342  
343  
344  
345  
346  
347  
348  
349  
350  
351  
352  
353  
354  
355  
356  
357  
358  
359  
360  
361  
362  
363  
364  
365  
366  
367  
368  
369  
370  
371  
372  
373  
374  
375  
376  
377  
378  
379  
380  
381  
382  
383  
384  
385  
386  
387  
388  
389  
390  
391  
392  
393  
394  
395  
396  
397  
398  
399  
400  
401  
402  
403  
404  
405  
406  
407  
408  
409  
410  
411  
412  
413  
414  
415  
416  
417  
418  
419  
420  
421  
422  
423  
424  
425  
426  
427  
428  
429  
430  
431  
432  
433  
434  
435  
436  
437  
438  
439  
440  
441  
442  
443  
444  
445  
446  
447  
448  
449  
450  
451  
452  
453  
454  
455  
456  
457  
458  
459  
460  
461  
462  
463  
464  
465  
466  
467  
468  
469  
470  
471  
472  
473  
474  
475  
476  
477  
478  
479  
480  
481  
482  
483  
484  
485  
486  
487  
488  
489  
490  
491  
492  
493  
494  
495  
496  
497  
498  
499  
500  
501  
502  
503  
504  
505  
506  
507  
508  
509  
510  
511  
512  
513  
514  
515  
516  
517  
518  
519  
520  
521  
522  
523  
524  
525  
526  
527  
528  
529  
530  
531  
532  
533  
534  
535  
536  
537  
538  
539  
540  
541  
542  
543  
544  
545  
546  
547  
548  
549  
550  
551  
552  
553  
554  
555  
556  
557  
558  
559  
560  
561  
562  
563  
564  
565  
566  
567  
568  
569  
570  
571  
572  
573  
574  
575  
576  
577  
578  
579  
580  
581  
582  
583  
584  
585  
586  
587  
588  
589  
590  
591  
592  
593  
594  
595  
596  
597  
598  
599  
600  
601  
602  
603  
604  
605  
606  
607  
608  
609  
610  
611  
612  
613  
614  
615  
616  
617  
618  
619  
620  
621  
622  
623  
624  
625  
626  
627  
628  
629  
630  
631  
632  
633  
634  
635  
636  
637  
638  
639  
640  
641  
642  
643  
644  
645  
646  
647  
648  
649  
650  
651  
652  
653  
654  
655  
656  
657  
658  
659  
660  
661  
662  
663  
664  
665  
666  
667  
668  
669  
670  
671  
672  
673  
674  
675  
676  
677  
678  
679  
680  
681  
682  
683  
684  
685  
686  
687  
688  
689  
690  
691  
692  
693  
694  
695  
696  
697  
698  
699  
700  
701  
702  
703  
704  
705  
706  
707  
708  
709  
710  
711  
712  
713  
714  
715  
716  
717  
718  
719  
720  
721  
722  
723  
724  
725  
726  
727  
728  
729  
730  
731  
732  
733  
734  
735  
736  
737  
738  
739  
740  
741  
742  
743  
744  
745  
746  
747  
748  
749  
750  
751  
752  
753  
754  
755  
756  
757  
758  
759  
760  
761  
762  
763  
764  
765  
766  
767  
768  
769  
770  
771  
772  
773  
774  
775  
776  
777  
778  
779  
780  
781  
782  
783  
784  
785  
786  
787  
788  
789  
790  
791  
792  
793  
794  
795  
796  
797  
798  
799  
800  
801  
802  
803  
804  
805  
806  
807  
808  
809  
810  
811  
812  
813  
814  
815  
816  
817  
818  
819  
820  
821  
822  
823  
824  
825  
826  
827  
828  
829  
830  
831  
832  
833  
834  
835  
836  
837  
838  
839  
840  
841  
842  
843  
844  
845  
846  
847  
848  
849  
850  
851  
852  
853  
854  
855  
856  
857  
858  
859  
860  
861  
862  
863  
864  
865  
866  
867  
868  
869  
870  
871  
872  
873  
874  
875  
876  
877  
878  
879  
880  
881  
882  
883  
884  
885  
886  
887  
888  
889  
890  
891  
892  
893  
894  
895  
896  
897  
898  
899  
900  
901  
902  
903  
904  
905  
906  
907  
908  
909  
910  
911  
912  
913  
914  
915  
916  
917  
918  
919  
920  
921  
922  
923  
924  
925  
926  
927  
928  
929  
930  
931  
932  
933  
934  
935  
936  
937  
938  
939  
940  
941  
942  
943  
944  
945  
946  
947  
948  
949  
950  
951  
952  
953  
954  
955  
956  
957  
958  
959  
960  
961  
962  
963  
964  
965  
966  
967  
968  
969  
970  
971  
972  
973  
974  
975  
976  
977  
978  
979  
980  
981  
982  
983  
984  
985  
986  
987  
988  
989  
990  
991  
992  
993  
994  
995  
996  
997  
998  
999  
1000

1  
2  
3 WHtR better correlated with cardiometabolic risk factors than BMI in overweight/obese  
4 children.<sup>(17)</sup> One study in Singapore suggested that early BMI may have an important impact  
5 on later metabolic outcomes in Asian populations.<sup>(18)</sup>  
6  
7

8  
9  
10 Few studies have evaluated the associations between infant BMI trajectory and childhood  
11 overweight and obesity.<sup>(12, 19-21)</sup> Weight-for-length percentile curves are often used but do not  
12 account for the age-based changes that reflect different stages of infancy.<sup>(19)</sup> BMI increases  
13 from birth and reaches a maximum called the 'BMI peak' around age 7-9 months old, and  
14 then decreases and reaches a nadir around age 4-6 years old before increasing once  
15 again.<sup>(19-21)</sup> According to Silverwood et al, both age and magnitude of BMI peak were  
16 positively associated with later BMI z-scores.<sup>(20)</sup> Additionally, several studies have used  
17 statistical models of growth trajectories to estimate the magnitude and timing of infant BMI  
18 peak.<sup>(18-27)</sup>  
19  
20  
21  
22  
23  
24  
25  
26  
27

28 Ancestry-specific differences in Infant BMI peak are found between African-American and  
29 European populations.<sup>(19)</sup> However, to date there have been no studies performed in China to  
30 demonstrate the utility of infant BMI peak for predicting the risk of childhood overweight and  
31 obesity. In order to form comparisons with other populations, we referred to a BMI modeling  
32 set by a cohort study in Philadelphia, USA<sup>(19, 23)</sup> Using a community-based longitudinal data  
33 set of serial measurements of length and weight from birth to childhood in Shanghai, we  
34 aimed to estimate the BMI peak characteristics in order to study the association between the  
35 infant BMI peak and overweight and obesity at age 2 years.  
36  
37  
38  
39  
40  
41  
42  
43  
44  
45  
46  
47

## 48 **Methods**

### 49 **Study Participants**

50  
51  
52 We obtained our community-based longitudinal cohort data from the Shanghai Jing'an  
53 District birth and health records. Shanghai has a population of 19 million, as of 2009, and is  
54 divided into seventeen urban districts and one suburban district. Jing'an District is located at  
55  
56  
57  
58  
59  
60

1  
2  
3 the city center and has a population of 248,000, as of 2009. "Providing free of charge health  
4 examination to children aged 0-3 years" was a project funded by the Shanghai government  
5 for Jing'an children born from September 2009 onwards. Community health centers in the  
6  
7 Jing'an District provide routine well-child checks for infants and young children. A District  
8  
9 Childcare Database for all health centers in this project was established and managed by the  
10  
11 Jing'an maternal and child health care center. For the Childcare Database, health center  
12  
13 nurses record children's gender, gestational age, birthweight, feeding and sleeping behaviors,  
14  
15 and other information during the child health examination. All children were followed from  
16  
17 the age of one month to two or three years old until they went to kindergarten.  
18  
19  
20

21  
22 For this study, we used data from the Childcare Database for all children who were born from  
23  
24 September 1st 2009 to September 1st 2013 and received care at the Jing'an District health  
25  
26 centers. Children were followed from birth, with data collected at 1, 2, 4, 6, 9, 12, 18 and 24  
27  
28 months of age from all five communities in Jing'an District, representing 69.9% (7456/10674)  
29  
30 of all children in this age range in Jing'an District. Roughly 30% of children moved from  
31  
32 Jing'an district to other districts of Shanghai during the study period, which resulted in a loss  
33  
34 of follow-up in these cases. We gained approval (IRB#2015-TYSQ-03-11) for the current  
35  
36 study from the Medical Research Ethics Committee, School of Public Health, Fudan  
37  
38 University.  
39  
40  
41  
42  
43

#### 44 **Inclusion and exclusion criteria**

45  
46 Inclusion criteria for the infants in this study specified healthy single births, a gestational age  
47  
48 between 37 and 42 weeks, and no physical problems. Participants were included if they had  
49  
50 at least six measurements of length and weight in the first 13.5 months of life. The number  
51  
52 and range of measurements were determined by the BMI modeling set by a cohort study in  
53  
54 Philadelphia, USA.<sup>(19, 23)</sup> Because the BMI peak occurs around 7-9 months old, we included  
55  
56 children who had at least one health examination visit between 213-274 days old. To test the  
57  
58  
59  
60



1  
2  
3 relationship between infant BMI peak and childhood overweight and obesity, we included  
4 measurements for children at 2 years old when the data was available. Preterm infants (n =  
5 289), term twins (n = 52), post-term infants (n = 11), and term infants with congenital defects  
6 (n = 30) were excluded. These children have different curve characteristics than normal term  
7 children.<sup>(28)</sup> We used exclusion criteria similar to the Philadelphia cohort study to compare  
8 peak BMI with other populations.<sup>(19)</sup> There were 21.2% (2268/7456) infants eligible for  
9 analysis. Of these, we observed 85.9% (1949/2268) children from birth to age two years, i.e.  
10 until September 1st 2015 (Figure 1). To assess potential selection bias, we compared  
11 demographics and birth characteristics of the analytic sample (n=2268) to the excluded  
12 healthy singleton infants (n=4806). There were no substantial differences in sex, birthweight,  
13 maternal age or overweight and obese rates at age 2 years of the two samples.  
14 (Supplemental Table 1)  
15  
16  
17  
18  
19  
20  
21  
22  
23  
24  
25  
26  
27  
28  
29  
30

### 31 **Anthropometric measures**

32  
33 Weight and length of children were measured by the same type of instruments at the  
34 community health centers. Weight for infants (0-18 months) was measured by an electronic  
35 pediatric scale (SECA 376 Weighing Scale) to the nearest 0.005 kg. Weight for toddlers  
36 (19-24 months) was measured by another type of scale (SECA 704c Weighing Scale) to the  
37 nearest 0.05 kg. Recumbent length was measured from the top of the head to soles of feet  
38 using an infant mat (SECA416 Mobile Measuring Mat) to the nearest 0.1 cm. BMI z-score  
39 (BAZ) of children at age two years were calculated according to the 2006 World Health  
40 Organization (WHO) Child Growth Standards using the WHO Anthro 2009 software.<sup>(29)</sup>The  
41 WHO Child Growth Standards was based on a multi-country study involving breastfed  
42 children from six geographically distinct sites.<sup>(1)</sup> Overweight was defined as BAZ > +1  
43 (BMI >85th percentile) while obesity was defined as BAZ > + 2 (BMI >97th percentile). Normal  
44 weight was defined as  $-1 \leq \text{BAZ} \leq +1$ .<sup>(2, 13)</sup> Based on reports from previous studies,<sup>(11, 12, 19, 21)</sup>  
45 we extracted factors associated with childhood overweight from the electronic medical  
46  
47  
48  
49  
50  
51  
52  
53  
54  
55  
56  
57  
58  
59  
60

records. These factors were birthweight, sex, delivery mode, maternal age, duration of breastfeeding and sleeping data. Parents answered to feeding and sleeping questions in follow-ups. They reported the age in months at which breastfeeding was stopped. Sleep duration in hours was recorded at age 2 years. Because this cohort was set up after birth, some information about pregnancy and parents information was not available.

### BMI trajectory modeling

BMI peak was identified from subject-specific BMI growth curves established by serial BMI measurements. (Figure 2) A polynomial regression model with quadratic terms was fit to the BMI measurements over time. Regression modeling was used for each child to fit the following equation: <sup>(19)</sup>

$$BMI = \beta_0 + \beta_1(\text{age in days}) + \beta_2(\text{age in days})^2$$

The first inflection point occurred at less than 408 days as derived from the equation and this was identified as BMI peak. The magnitude and timing of BMI peak were found by taking derivatives as follows:

$$BMI' = 2\beta_2(\text{age in days}) + \beta_1 = 0$$

Thus,

$$T_{peak} = -\frac{\beta_1}{2\beta_2}$$

$$BMI_{peak} = \frac{4\beta_0\beta_2 - \beta_1^2}{4\beta_2}$$

$T_{peak}$  is the timing of BMI peak and  $BMI_{peak}$  is the magnitude of BMI peak.

1  
2  
3 The pre-peak velocity was calculated using the following equation, with BMI at 14 days of age  
4 as the baseline measurement to avoid the period of neonatal weight loss seen in the first two  
5 weeks of life.<sup>(21)</sup>  
6  
7

$$(BMI_{Peak} - BMI_{14days}) / (T_{peak} - 14 \text{ days}).$$

8  
9  
10  
11  
12  
13 The subjects who had a BMI peak within 14 – 408 days of life were defined as estimable (“fit”)  
14 BMI trajectories, while those who were not identifiable by the model were called inestimable  
15 (“not fit”) BMI trajectories.<sup>(19)</sup>  
16  
17

### 18 19 20 **Statistical analysis**

21  
22  
23 SPSS 20.0 statistical software was used for all analyses and metalab2014b for the BMI  
24 trajectory modeling. Data were presented as mean with 95% confidence interval. Categorical  
25 data were summarized by calculating percentages. The chi-square test and two-sampled t  
26 tests were used to examine the differences between participants whose BMI trajectories were  
27 estimable or inestimable for the quadratic regression model and those who did or did not  
28 have measurements at age two years. We classified birthweight as the following categories:  
29 1.5 to less than 2.5 kg, 2.5 to less than 4 kg, and equal to or greater than 4 kg in the  
30 chi-square test. (Table 1)  
31  
32

33  
34  
35 To evaluate the associations between covariates and infant BMI peak characteristics and  
36 childhood BMI Z-scores, bivariate analyses were used by one-way ANOVA with post hoc  
37 Bonferroni adjustments. (Table 2) BMI peak characteristics [age (in months) and magnitude  
38 (BMI; in kg/m<sup>2</sup>) at peak and pre-peak velocities (kg/m<sup>2</sup>/month)] were estimated. The  
39 correlations between the estimated BMI peak characteristics were assessed by pearson  
40 correlation analysis. (Supplemental Table 2) Logistic regression was used to assess the  
41 associations between BMI peak characteristics and childhood overweight (BAZ > +1) or  
42 obesity (BAZ > +2), adjusting for other background characteristics. Gender, delivery mode  
43 and maternal ages were defined as categorical variables. Birthweight, duration of  
44 breastfeeding and sleeping were defined as continuous variable. We derived  
45  
46  
47  
48  
49  
50  
51  
52  
53  
54  
55  
56  
57  
58  
59  
60

1  
2  
3 birthweight-for-gestational-age z-scores using references from International standards for  
4 newborn.<sup>(30)</sup> (Table 3) The coefficient of determination denoted  $R^2$  was used to describe the  
5 fit of every subject-specific curve. Statistical analyses were performed using only the subjects  
6 with estimable BMI peak.<sup>(19-22)</sup> All statistical tests were two-tailed and P values <0.05 were  
7 considered statistically significant.  
8  
9  
10  
11  
12  
13  
14  
15  
16  
17  
18  
19  
20  
21  
22  
23  
24  
25  
26  
27  
28  
29  
30  
31  
32  
33  
34  
35  
36  
37  
38  
39  
40  
41  
42  
43  
44  
45  
46  
47  
48  
49  
50  
51  
52  
53  
54  
55  
56  
57  
58  
59  
60

For peer review only

## Results

### Description of the study population

The demographic characteristics of the study population are presented in Table 1. There were 2268 infants eligible for analysis, 49.6% male and 50.4% female. Most had a normal birthweight of 2.5 to less than 4 kg (n=2073, 91.4%). Eighty-five percent (n =1949) of infants had follow-up data at least through the age of 2 years (Table 1). Evaluated by the WHO Child Growth Standards, 17.0% (n =332) infants were overweight (BAZ > +1) and 2.3% (n =44) obese (BAZ > +2) at age 2 years.

### Results of infant BMI trajectory modeling

Individual BMI trajectories were estimable using the polynomial regression model for 91.4% of the sample, with reasonable fit (mean  $R^2=0.70\pm0.23$ ). Mean magnitude of BMI peak was 18.33 (95% CI 18.26-18.39)  $\text{kg/m}^2$  and occurred at 7.61 (95% CI 7.55-7.67) months. (Supplemental Figure1) Those subjects with inestimable BMI peak mostly showed either a BMI peak after 408 days of life or a decrease in BMI after birth. The prevalence of macrosomia (birthweight>4kg) infants with inestimable infancy BMI peak were higher than that with estimable ones (6.7% vs 11.3%,  $P =0.024$ ). Heavier macrosomia infants reached their BMI peak much earlier than other infants, since some of them attained BMI peak measurements just after birth. There was no significant difference in other factors between subjects with estimable and inestimable peak BMI ( $P>0.05$ ). (Table 1)

### Participants' characteristics in relation to infant BMI trajectories

Infant BMI trajectories were related to both sex and birthweight (Table 2). The magnitude of BMI peak was greater, and timing of peak BMI was earlier, in boys than in girls and in children of higher birthweight than those of lower birthweight. There was no statistical significant difference in pre-peak velocities with regards to infant characteristics.

### ***General characteristics of children at age two years***

We tested for differences between infants who had BMI data with estimable BMI peak at age two years (n=1790) vs. those who did not (n=159). There was no statistical difference between the two groups in sex, birthweight, maternal age, duration of breastfeeding, duration of sleep and overweight rates at age 2 years. ( $P > 0.05$ ).

### ***Association between infant BMI peak and childhood overweight and obesity***

Table 3 shows the results of the association between BMI peak and risk of overweight and obesity at two years of age. When only the infant BMI peak was included in the model, higher magnitude and later timing of infant BMI peak increased the risk of overweight at two years. Furthermore, after adjustment for other infant background factors, higher magnitude (OR 3.11; 95% CI 2.64–3.66) and later timing (OR 1.35; 95% CI 1.21-1.50) of infant BMI peak each increased the risk of overweight at two years. The results were also similar with regards to childhood obesity (Table 3).

## Discussion

Using a longitudinal set from a community-based cohort, we have demonstrated in the current analysis that infant BMI peak is useful for predicting childhood overweight and obesity in urban China. Boys had a higher average BMI peak and earlier average timing to achieve peak BMI than girls. Principally, our results show that higher BMI magnitude and later timing of infant BMI peak were each associated with increased risk of early childhood overweight and obesity.

This is the first community-based cohort study in China to characterize infant BMI peak and evaluate its association with risk of being overweight and obesity in early childhood. There have been remarkable increases in overweight and obesity in both rural and urban areas of China.<sup>(31)</sup> Our findings can therefore be generalized to similarly aged children in Shanghai city and, to some degree, be extended to other areas in China. The data used in our analysis were routinely collected by the health centers where children are offered routine healthcare, such as immunizations and physical examination; thus, the collected measurements are a valid and reliable data set for addressing the study questions. The longitudinal nature of the cohort data and the repeated measurements of length and weight parameters provided us with the opportunity to carefully model infant BMI trajectories of infants over the course of the first year of life. A limitation of our investigation was that only about 69.9% (7456/10674) of all children in this age range had health records that only 85.9% of eligible children had complete follow-up data up to 2 years of age. Because children with incomplete data were excluded from the analysis, the risk of selection bias cannot be totally ruled out. Another weakness of the study is that the data concerning parent's BMI, pregnancy weight gain, gestational diabetes mellitus and income were not available, because the cohort was defined after birth and not prenatally. Additionally, the reliability of the anthropometric measurements could not be ascertained due to the retrospective nature of the cohort. Finally, the recorded BMI peak is estimation and not the true peak. Use of estimated BMI peak is potentially related to uncertainty in subsequent regression models.<sup>(18)</sup>

1  
2  
3 Few studies have investigated the utility of infant BMI peak in predicting childhood overweight  
4 and obesity.<sup>(19-21)</sup> Principally, we found that higher BMI magnitude and later timing of infant  
5 BMI peak were each associated with increased risk of early childhood overweight and obesity.  
6  
7 This result is similar to previous research from the cohort study conducted in USA<sup>(19)</sup> and the  
8 Uppsala Family Study in Europe.<sup>(20)</sup> However, some of our findings are not consistent with  
9 previous research. A 2010 prospective cohort study showed that more rapid increases in  
10 weight for length in the first six months of life were associated with a sharp increase in  
11 childhood obesity risk.<sup>(32)</sup> Although most previous studies used weight or BMI at  
12 study-dependent fixed ages,<sup>(32, 33)</sup> our work was based on longitudinal and repeated  
13 measures of length and weight. Our results also demonstrate the differences in sex and  
14 birthweight were associated with BMI magnitude and timing of the BMI peak, but not with  
15 pre-peak velocity.<sup>(19, 21)</sup> In recent studies, later timing of the BMI peak was observed in both  
16 girls and boys (8-9 months of age) from European or American populations.<sup>(20, 21, 23)</sup> Girls  
17 peaked slightly later than boys in both populations. However, one recent study conducted in  
18 Singapore suggested that Asian children peak earlier (6 months) than European or American  
19 children and that sex does not significantly influence age at BMI peak in Asian infants.  
20 Notably, that study used natural cubic splines, compared to our analysis that used a  
21 polynomial regression model. It is possible that the use of different modeling methods to  
22 derive BMI peak characteristics could account for the observed differences across  
23 populations.<sup>(18)</sup> Also, the effect of breastfeeding may also explain the different ages of BMI  
24 peak observed across genders and populations. Further research is needed to demonstrate  
25 the clinical relevance of these small differences in BMI peak across populations. Furthermore,  
26 a previous study found a positive association between an earlier and higher BMI peak and  
27 birthweight.<sup>(19, 20)</sup> In our study, higher birthweight was not associated with a lower velocity,  
28 which was found by the Philadelphia cohort study.<sup>(19)</sup>

29  
30  
31  
32  
33  
34  
35  
36  
37  
38  
39  
40  
41  
42  
43  
44  
45  
46  
47  
48  
49  
50  
51  
52  
53  
54  
55  
56  
57  
58  
59  
60  
There is no widely accepted method to model infant BMI peak, appropriate peak age range  
and the number and timing of serial measurements.<sup>(23)</sup> China is undergoing rapid social and  
economic developments, which is accompanied by an improvement in nutritional status.



1  
2  
3 Current estimates indicate that overweight and obesity are rising in China, including in  
4 children.<sup>(5)</sup> However, there has been a lack of studies evaluating the utility of BMI peak for  
5 predicting risk for being overweight or obese in later childhood in China, although BMI peak  
6 has been demonstrated to be ancestry-specific.<sup>(19)</sup> Therefore, these findings can be used to  
7 help predict the early onset of obesity and to serve as a springboard for planning appropriate  
8 interventions to reduce the increasing trend of childhood overweightness and obesity in  
9 urban China. It is unclear why infants in our study had earlier BMI peaks (7-8 months) than  
10 infants from America and Europe (8-9 months),<sup>(20, 21, 23)</sup> but it has been demonstrated that  
11 such differences may reflect ancestry-specific BMI peaks across populations.<sup>(19)</sup> For this  
12 reason, cross-cultural investigations are required to determine the validity of this assertion.  
13 Understanding these differences may influence the design of public health intervention  
14 protocols to address childhood obesity.<sup>(34-36)</sup>

## 27 Conclusion

28  
29  
30 Using a community-based longitudinal cohort study with repeated measurements of infant  
31 growth parameters, we have for the first time determined that infant BMI peak is a useful  
32 metric to predict early childhood overweight and obesity in urban China. Our findings suggest  
33 that higher magnitude and later timing of infant BMI peak increased the risk of early childhood  
34 overweight and obesity. Infancy therefore represents a critical window of opportunity to  
35 prevent the emerging epidemic of overweight and obesity in children. Further studies from  
36 other urban populations in China are required in order to confirm or question our  
37 observations.  
38  
39  
40  
41  
42  
43  
44  
45  
46  
47  
48  
49  
50  
51  
52  
53  
54  
55  
56  
57  
58  
59  
60

## Acknowledgements

We are grateful to the staff in Jing'an maternal and child health care center for data extraction.

We also acknowledge all children and their parent's for participation.

## Authors' contributions

JieSun, Bright I Nwaru, and ZhuochunWu were responsible for the study design, analysis of the study and approval of the submitted and final version. Jing Hua and Xiaohong Li analyzed the data, interpreted the results and commented on the manuscript.

## Funding

This study was funded by National Natural Science Foundation of China [71573049].

## Ethics Approval

All procedures performed in this study were in accordance with the ethical standard. We gained approval (IRB#2015-TYSQ-03-11) for the current study from the Medical Research Ethics Committee, School of Public Health, Fudan University. Informed consent was obtained from all individual participants included in the study.

## Competing interests

The authors declare that they have no conflict of interest.

## Data Sharing Statement

No additional data are available.

**References:**

1. Commission presents its final report, calling for high-level action to address major health challenge. Available from <http://www.who.int/end-childhood-obesity/news/launch-final-report/en/>. 2016.
2. Benjamin Neelon SE, Schou Andersen C, Schmidt Morgen C, Kamper-Jorgensen M, Oken E, Gillman MW, et al. Early child care and obesity at 12 months of age in the Danish National Birth Cohort. *International journal of obesity* (2005). 2015;39(1):33-8.
3. Freedman DS, Mei Z, Srinivasan SR, Berenson GS, Dietz WH. Cardiovascular risk factors and excess adiposity among overweight children and adolescents: the Bogalusa Heart Study. *The Journal of pediatrics*. 2007;150(1):12-7.e2.
4. Skinner AC, Perrin EM, Skelton JA. Prevalence of obesity and severe obesity in US children, 1999-2014. *Obesity* (Silver Spring, Md). 2016;24(5):1116-23.
5. Ji CY. Report on childhood obesity in China (4) prevalence and trends of overweight and obesity in Chinese urban school-age children and adolescents, 1985-2000. *Biomedical and environmental sciences : BES*. 2007;20(1):1-10.
6. Commission. CNhaFP. National Report on Nutritional status of children aged 0-6 year. China:National health and Family Planning Commission. China;. 2012.
7. Andersen LG, Holst C, Michaelsen KF, Baker JL, Sorensen TI. Weight and weight gain during early infancy predict childhood obesity: a case-cohort study. *International journal of obesity* (2005). 2012;36(10):1306-11.
8. Baird J, Fisher D, Lucas P, Kleijnen J, Roberts H, Law C. Being big or growing fast: systematic review of size and growth in infancy and later obesity. *BMJ (Clinical research ed)*. 2005;331(7522):929.
9. Leunissen RW, Kerkhof GF, Stijnen T, Hokken-Koelega A. Timing and tempo of first-year rapid growth in relation to cardiovascular and metabolic risk profile in early adulthood. *Jama*. 2009;301(21):2234-42.
10. Monteiro PO, Victora CG. Rapid growth in infancy and childhood and obesity in later life--a systematic review. *Obesity reviews : an official journal of the International Association for the Study of Obesity*. 2005;6(2):143-54.
11. Weng SF, Redsell SA, Swift JA, Yang M, Glazebrook CP. Systematic review and meta-analyses of risk factors for childhood overweight identifiable during infancy. *Archives of disease in childhood*. 2012;97(12):1019-26.
12. Guo Y. Growth level of urban Chinese infants from birth to 2 years, body mass index Z scores' predicting model and its age trajectory in relation to maternal pre-pregnancy body weight status. 2013.
13. Ma JQ, Zhou LL, Hu YQ, Liu SS, Sheng XY. Association between feeding practices and weight status in young children. *BMC pediatrics*. 2015;15:97.
14. Gortmaker SL, Swinburn BA, Levy D, Carter R, Mabry PL, Finegood DT, et al. Changing the future of obesity: science, policy, and action. *Lancet (London, England)*. 2011;378(9793):838-47.
15. Robinson SM, Crozier SR, Harvey NC, Barton BD, Law CM, Godfrey KM, et al. Modifiable early-life risk factors for childhood adiposity and overweight: an analysis of their combined impact and potential for prevention. *The American journal of clinical nutrition*. 2015;101(2):368-75.
16. Kolsgaard ML, Joner G, Brunborg C, Anderssen SA, Tonstad S, Andersen LF. Reduction in BMI z-score and improvement in cardiometabolic risk factors in obese children and adolescents. *The Oslo Adiposity*

- 1  
2  
3 Intervention Study - a hospital/public health nurse combined treatment. BMC pediatrics. 2011;11:47.  
4  
5 17. Sijtsma A, Bocca G, L'Abée C, Liem ET, Sauer PJ, Corpeleijn E. Waist-to-height ratio, waist  
6 circumference and BMI as indicators of percentage fat mass and cardiometabolic risk factors in children  
7 aged 3-7 years. Clinical nutrition (Edinburgh, Scotland). 2014;33(2):311-5.  
8  
9 18. Aris IM, Bernard JY, Chen LW, Tint MT, Pang WW, Lim WY, et al. Infant body mass index peak and early  
10 childhood cardio-metabolic risk markers in a multi-ethnic Asian birth cohort. International journal of  
11 epidemiology. 2016.  
12  
13 19. Roy SM, Chesi A, Mentch F, Xiao R, Chiavacci R, Mitchell JA, et al. Body mass index (BMI) trajectories  
14 in infancy differ by population ancestry and may presage disparities in early childhood obesity. The  
15 Journal of clinical endocrinology and metabolism. 2015;100(4):1551-60.  
16  
17 20. Silverwood RJ, De Stavola BL, Cole TJ, Leon DA. BMI peak in infancy as a predictor for later BMI in the  
18 Uppsala Family Study. International journal of obesity (2005). 2009;33(8):929-37.  
19  
20 21. Jensen SM, Ritz C, Ejlerskov KT, Molgaard C, Michaelsen KF. Infant BMI peak, breastfeeding, and body  
21 composition at age 3 y. The American journal of clinical nutrition. 2015;101(2):319-25.  
22  
23 22. WHO Multicentre Growth Reference Study Group. WHO Child Growth Standards:  
24 Length/height-for-age, Weight-for-age, Weight-for-length, Weight-for-height, and Body Mass  
25 Index-for-age: Methods and Development. Geneva:World Health Organization,2006. Available from:  
26 <http://www.who.int/childgrowth/standards/en/>. 2006.  
27  
28 23. Wen X, Kleinman K, Gillman MW, Rifas-Shiman SL, Taveras EM. Childhood body mass index  
29 trajectories: modeling, characterizing, pairwise correlations and socio-demographic predictors of  
30 trajectory characteristics. BMC medical research methodology. 2012;12:38.  
31  
32 24. Chivers P, Hands B, Parker H, Bulsara M, Beilin LJ, Kendall GE, et al. Body mass index, adiposity  
33 rebound and early feeding in a longitudinal cohort (Raine Study). International journal of obesity (2005).  
34 2010;34(7):1169-76.  
35  
36 25. Johnson W, Choh AC, Lee M, Towne B, Czerwinski SA, Demerath EW. Characterization of the infant  
37 BMI peak: sex differences, birth year cohort effects, association with concurrent adiposity, and heritability.  
38 American journal of human biology : the official journal of the Human Biology Council.  
39 2013;25(3):378-88.  
40  
41 26. Giles LC, Whitrow MJ, Davies MJ, Davies CE, Rumbold AR, Moore VM. Growth trajectories in early  
42 childhood, their relationship with antenatal and postnatal factors, and development of obesity by age 9  
43 years: results from an Australian birth cohort study. International journal of obesity (2005).  
44 2015;39(7):1049-56.  
45  
46 27. Sovio U, Kaakinen M, Tzoulaki I, Das S, Ruokonen A, Pouta A, et al. How do changes in body mass  
47 index in infancy and childhood associate with cardiometabolic profile in adulthood? Findings from the  
48 Northern Finland Birth Cohort 1966 Study. International journal of obesity (2005). 2014;38(1):53-9.  
49  
50 28. Fenton TR, Nasser R, Eliasziw M, Kim JH, Bilan D, Sauve R. Validating the weight gain of preterm  
51 infants between the reference growth curve of the fetus and the term infant. BMC pediatrics. 2013;13:92.  
52  
53 29. WHO. Anthro for personal computers, version 3. Software for assessing growth and development of  
54 the world's children. Geneva: WHO,2009. Available from: <http://www.who.int/childgrowth/software/en/>.  
55 2009.  
56  
57 30. Villar J, Cheikh Ismail L, Victora CG, Ohuma EO, Bertino E, Altman DG, et al. International standards  
58 for newborn weight, length, and head circumference by gestational age and sex: the Newborn  
59  
60

1  
2  
3 Cross-Sectional Study of the INTERGROWTH-21st Project. *Lancet* (London, England).

4 2014;384(9946):857-68.

5  
6 31. Zhang YX, Wang SR. Rural-urban comparison in prevalence of overweight and obesity among  
7 adolescents in Shandong, China. *Annals of human biology*. 2013;40(3):294-7.

8  
9 32. Taveras EM, Rifas-Shiman SL, Belfort MB, Kleinman KP, Oken E, Gillman MW. Weight status in the first  
10 6 months of life and obesity at 3 years of age. *Pediatrics*. 2009;123(4):1177-83.

11  
12 33. Guo B, Mei H, Yang S, Zhang J. [Prenatal factors associated with high BMI status of infants and  
13 toddlers]. *Zhonghua er ke za zhi = Chinese journal of pediatrics*. 2014;52(6):464-7.

14  
15 34. Taveras EM, Gillman MW, Kleinman K, Rich-Edwards JW, Rifas-Shiman SL. Racial/ethnic differences  
16 in early-life risk factors for childhood obesity. *Pediatrics*. 2010;125(4):686-95.

17  
18 35. Taveras EM, Gillman MW, Kleinman KP, Rich-Edwards JW, Rifas-Shiman SL. Reducing racial/ethnic  
19 disparities in childhood obesity: the role of early life risk factors. *JAMA pediatrics*. 2013;167(8):731-8.

20  
21 36. Zilanawala A, Davis-Kean P, Nazroo J, Sacker A, Simonton S, Kelly Y. Race/ethnic disparities in early  
22 childhood BMI, obesity and overweight in the United Kingdom and United States. *International journal of  
23 obesity (2005)*. 2015;39(3):520-9.

**Table 1** Participants' characteristics by subjects with "estimable"\* and "inestimable"# BMI peak

| Characteristics                                | n          | Estimable*, n (%)            | Inestimable#, n (%) |
|------------------------------------------------|------------|------------------------------|---------------------|
| Total number                                   | 2268       | 2073                         | 195                 |
| Gender                                         |            |                              |                     |
| Male                                           | 1126       | 1022 (49.3)                  | 104 (53.3)          |
| Female                                         | 1142       | 1051 (50.7)                  | 91 (46.7)           |
| Birth weight                                   |            |                              |                     |
| 1.5 to <2.5kg                                  | 35         | 30 (1.4)                     | 5 (2.6)             |
| 2.5 to <4.0kg                                  | 2073       | 1905 (91.9)                  | 168 (86.2)          |
| <b>≥4kg</b>                                    | <b>160</b> | <b>138 (6.7)<sup>a</sup></b> | <b>22 (11.3)</b>    |
| Delivery mode                                  |            |                              |                     |
| Vaginal birth                                  | 1086       | 989 (47.7)                   | 97 (49.7)           |
| Cesarean section                               | 1182       | 1084 (52.3)                  | 98 (50.3)           |
| Maternal Age                                   |            |                              |                     |
| >35y                                           | 176        | 159 (7.7)                    | 17 (8.7)            |
| ≤35y                                           | 2092       | 1914 (92.3)                  | 178 (91.3)          |
| Total number with data at age 2y               | 1949       | 1790 (86.3)                  | 159 (81.5)          |
| Total number of overweight and obese at age 2y | 332        | 313 (17.5)                   | 19 (11.9)           |
| Total number of obese at age 2y                | 44         | 43 (2.4)                     | 1 (0.6)             |

a.P<0.05

\*Estimable: fit and identifiable BMI peak within 14–408 days of life.

# Inestimable: Not fit and identifiable.

Chi-square tests were used to examine the differences between Estimable or Inestimable group.

**Table 2 Infant characteristics in relation to infant BMI peak trajectories**

|                  |                                      | Magnitude(kg/m <sup>2</sup> ),<br>Mean (95% CI) | Age(months),<br>Mean (95% CI)      | Pre-peak<br>velocities(kg/m <sup>2</sup><br>/month)<br>Mean (95% CI) |
|------------------|--------------------------------------|-------------------------------------------------|------------------------------------|----------------------------------------------------------------------|
| Total            | n=2073                               | 18.33(18.26-18.39)                              | 7.61(7.55-7.67)                    | 0.43(0.42-0.44)                                                      |
| Gender           |                                      |                                                 |                                    |                                                                      |
|                  | <b>male (n=1022)</b>                 | <b>18.60(18.21-18.69)<sup>a</sup></b>           | <b>7.54(7.46-7.63)<sup>b</sup></b> | 0.42(0.41-0.43)                                                      |
|                  | female (n=1051)                      | 18.07(17.98-18.16)                              | 7.67(7.59-7.76)                    | 0.43(0.42-0.44)                                                      |
| Birth<br>Weight  |                                      |                                                 |                                    |                                                                      |
|                  | 1.5 to<br><2.5kg(n=30)               | 17.63(17.13-18.13)                              | 8.13(7.56-8.70)                    | 0.44(0.35-0.53)                                                      |
|                  | 2.5 to<br><4.0kg(n=1905)             | 18.27(18.21-18.34)                              | 7.63(7.57-7.70)                    | 0.43(0.42-0.44)                                                      |
|                  | <b>&gt;=4kg(n=138)</b>               | <b>19.25(18.97-19.52)<sup>b</sup></b>           | <b>7.11(6.88-7.34)<sup>a</sup></b> | 0.39(0.35-0.42)                                                      |
| Delivery<br>Mode |                                      |                                                 |                                    |                                                                      |
|                  | Vaginal birth<br>(n=989)             | 18.24(18.14-18.34)                              | 7.64(7.56-7.73)                    | 0.43(0.42-0.44)                                                      |
|                  | <b>Cesarean section<br/>(n=1084)</b> | <b>18.41(18.32-18.50)<sup>a</sup></b>           | 7.58(7.49-7.66)                    | 0.43(0.42-0.44)                                                      |
| Maternal<br>Age  |                                      |                                                 |                                    |                                                                      |
|                  | >35y(n=159)                          | 18.42(18.18-18.66)                              | 7.61(7.49-7.82)                    | 0.44(0.41-0.48)                                                      |
|                  | <=35y(n=1914)                        | 18.32(18.25-18.39)                              | 7.61(7.55-7.67)                    | 0.42(0.41-0.43)                                                      |

a.P<0.001 b.P<0.05

The analysis includes only infants who had BMI peak within 0-408 days and whose BMI trajectories were estimable by the quadratic model.

Bivariate comparison was performed using one-way ANOVA with post hoc Bonferroni multiple comparison test.

**Table 3 Association between BMI peak characteristics and overweight and obesity at age 2 years**

|                                               | Overweight at 2y (n=1790)                                    |                                              | Obesity at 2y (n=1790)                                       |                                              |
|-----------------------------------------------|--------------------------------------------------------------|----------------------------------------------|--------------------------------------------------------------|----------------------------------------------|
|                                               | Model containing infant BMI trajectory characteristics alone | Initial model plus all independent variables | Model containing infant BMI trajectory characteristics alone | Initial model plus all independent variables |
|                                               | OR (95% CI)                                                  | OR (95% CI)                                  | OR (95% CI)                                                  | OR (95% CI)                                  |
| Magnitude(kg/m <sup>2</sup> )                 | <b>2.94(2.54-3.40)<sup>a</sup></b>                           | <b>3.11(2.64-3.66)<sup>a</sup></b>           | <b>2.76(2.11-3.60)<sup>a</sup></b>                           | <b>2.69(2.00-3.61)<sup>a</sup></b>           |
| Age (months)                                  | <b>1.36(1.23-1.51)<sup>a</sup></b>                           | <b>1.35(1.21-1.50)<sup>a</sup></b>           | <b>1.33(1.08-1.65)<sup>b</sup></b>                           | <b>1.35(1.08-1.68)<sup>b</sup></b>           |
| Pre-peak velocities(kg/m <sup>2</sup> /month) | <b>0.17(0.07-0.40)<sup>a</sup></b>                           | <b>0.14(0.06-0.34)<sup>a</sup></b>           | <b>0.10(0.02-0.56)<sup>b</sup></b>                           | <b>0.12(0.02-0.74)<sup>c</sup></b>           |
| male(vs female)                               |                                                              | <b>0.67(0.49-0.90)<sup>b</sup></b>           |                                                              | 0.99(0.51-1.96)                              |
| birth weight z score.(continuous)             |                                                              | 1.06(0.89-1.26)                              |                                                              | 1.24(0.84-1.82)                              |
| Duration of breastfeeding(continuous)         |                                                              | 0.97(0.93-1.01)                              |                                                              | 0.92(0.84-1.01)                              |
| Duration of Sleep(continuous)                 |                                                              | 0.89(0.77-1.02)                              |                                                              | 0.89(0.63-1.24)                              |
| Cesarean section(vs Vaginal Birth)            |                                                              | 1.08(0.81-1.44)                              |                                                              | 0.80(0.42-1.54)                              |
| Mother Age(>35y vs<=35y)                      |                                                              | 0.68(0.38-1.21)                              |                                                              | 0.74(0.21-2.59)                              |

a.P<0.001 b.P<0.01 c.P<0.05

The analysis includes only infants who had BMI peak within 0-408 days and whose BMI trajectories were estimable by the quadratic model.



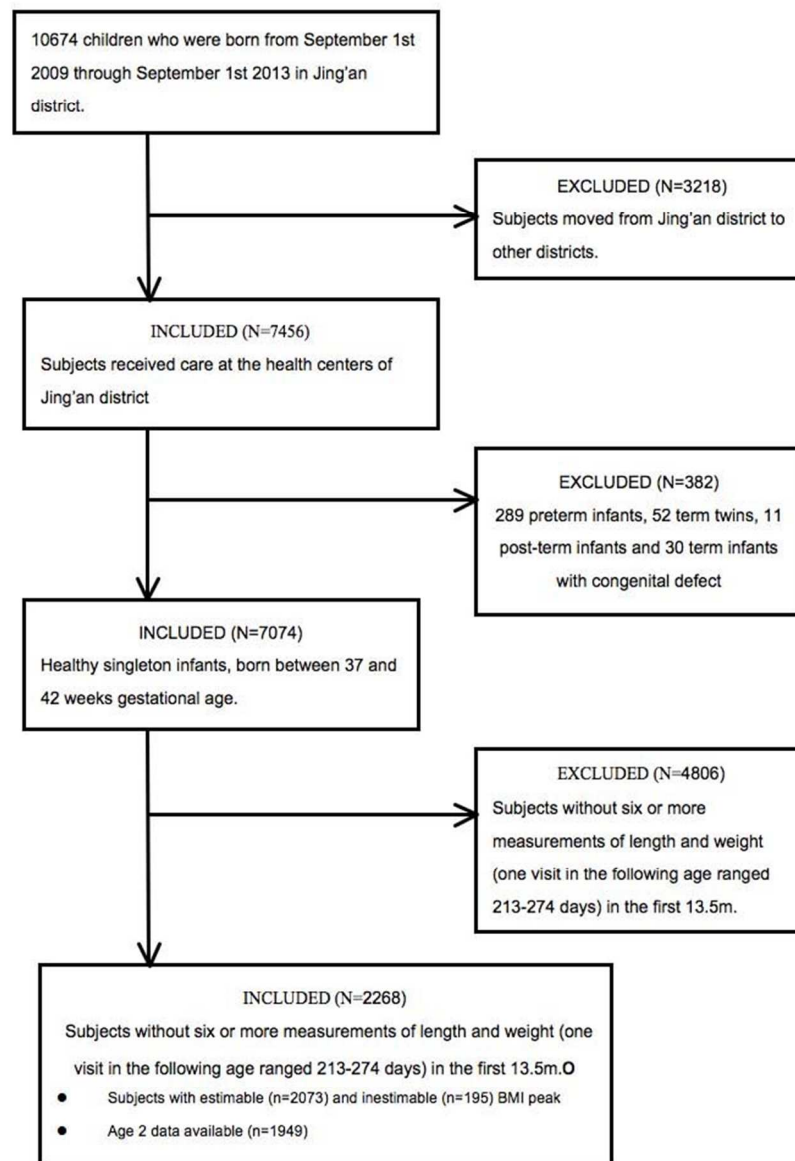

Figure1 Recruitment flow chart and study sample

64x83mm (300 x 300 DPI)



Figure 2 Plot of BMI data by age from birth to 13.5 months

169x127mm (300 x 300 DPI)

**Supplemental Table 1 Characteristics of the analytic and excluded healthy singleton infants**

| Characteristics                                | n           | Included, n (%)                | Excluded, n (%)    |
|------------------------------------------------|-------------|--------------------------------|--------------------|
| Total number                                   | 7074        | 2268(32.1)                     | 4806(67.9)         |
| Gender                                         |             |                                |                    |
| Male                                           | 3468        | 1126 (49.6)                    | 2342 (48.7)        |
| Female                                         | 3606        | 1142(50.4)                     | 2464 (51.3)        |
| Birth weight                                   |             |                                |                    |
| <4.0kg                                         | 6609        | 2108(92.9)                     | 4501 (93.7)        |
| ≥4kg                                           | 465         | 160 (7.1)                      | 305(6.3)           |
| Maternal Age                                   |             |                                |                    |
| >35y                                           | 570         | 176 (7.8)                      | 394 (8.2)          |
| ≤35y                                           | 6504        | 2092(92.2)                     | 4412(91.8)         |
| Total number with data at age 2y               | <b>1949</b> | <b>1949 (85.9)<sup>a</sup></b> | <b>2282 (47.4)</b> |
| Total number of overweight and obese at age 2y | 751         | 330 (16.9)                     | 421 (18.4)         |
| Total number of obese at age 2y                | 99          | 44 (2.3)                       | 55(2.4)            |

a.P<0.05

Chi-square tests were used to examine the differences between included or excluded group.

**Supplemental Table 2: Correlation matrix of infancy BMI characteristics**

|                              | Age of BMI Peak, mo | Pre-peak velocities, kg/m2/mo |
|------------------------------|---------------------|-------------------------------|
| Magnitude of BMI peak, kg/m2 | 0.03                | 0.654**                       |
| Age of BMI Peak, mo          |                     | 0.09**                        |

Significance is noted as: \*\*  $p \leq 0.01$ .

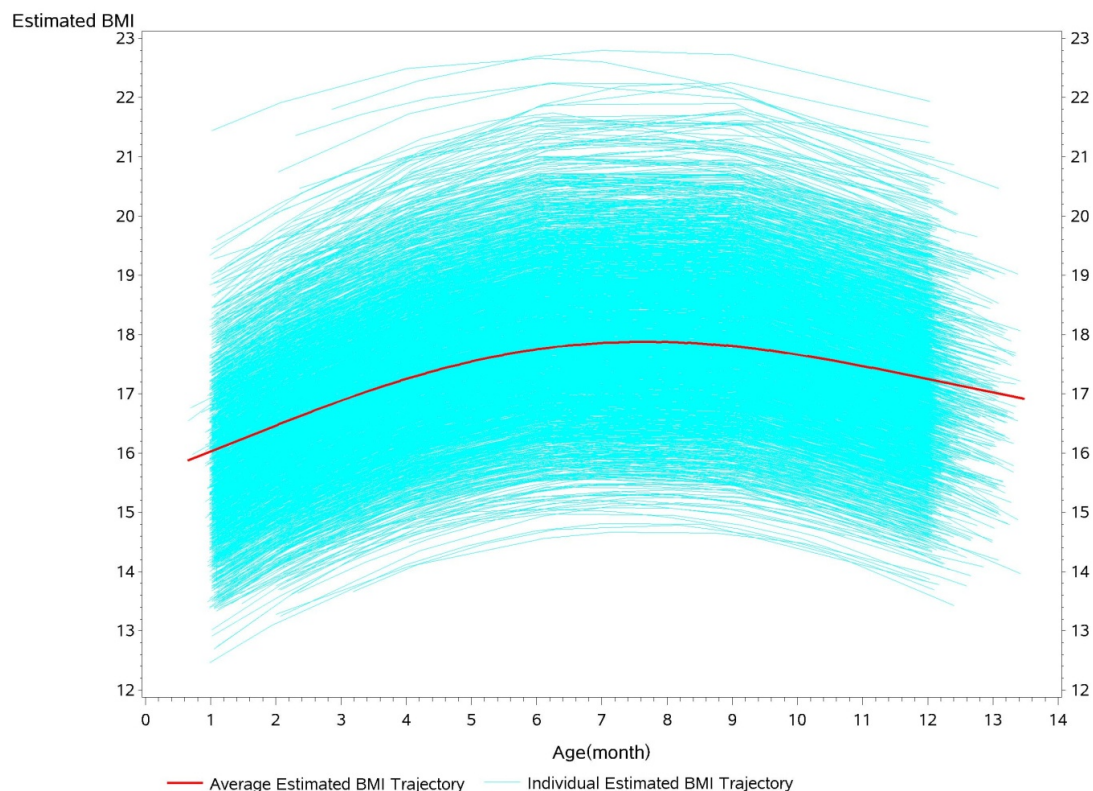

**Supplemental Figure1 Infant Estimated BMI trajectory by polynomial regression model**

Only

**STROBE 2007 (v4) checklist of items to be included in reports of observational studies in epidemiology\***  
**Checklist for cohort, case-control, and cross-sectional studies (combined)**

| Section/Topic             | Item # | Recommendation                                                                                                                                                                                                                                                                                                                                                                                                                                                         | Reported on page # |
|---------------------------|--------|------------------------------------------------------------------------------------------------------------------------------------------------------------------------------------------------------------------------------------------------------------------------------------------------------------------------------------------------------------------------------------------------------------------------------------------------------------------------|--------------------|
| Title and abstract        | 1      | (a) Indicate the study’s design with a commonly used term in the title or the abstract                                                                                                                                                                                                                                                                                                                                                                                 | 1                  |
|                           |        | (b) Provide in the abstract an informative and balanced summary of what was done and what was found                                                                                                                                                                                                                                                                                                                                                                    | 1                  |
| <b>Introduction</b>       |        |                                                                                                                                                                                                                                                                                                                                                                                                                                                                        |                    |
| Background/rationale      | 2      | Explain the scientific background and rationale for the investigation being reported                                                                                                                                                                                                                                                                                                                                                                                   | 2                  |
| Objectives                | 3      | State specific objectives, including any pre-specified hypotheses                                                                                                                                                                                                                                                                                                                                                                                                      | 3                  |
| <b>Methods</b>            |        |                                                                                                                                                                                                                                                                                                                                                                                                                                                                        |                    |
| Study design              | 4      | Present key elements of study design early in the paper                                                                                                                                                                                                                                                                                                                                                                                                                | 4                  |
| Setting                   | 5      | Describe the setting, locations, and relevant dates, including periods of recruitment, exposure, follow-up, and data collection                                                                                                                                                                                                                                                                                                                                        | 3-4,Figure1        |
| Participants              | 6      | (a) <i>Cohort study</i> —Give the eligibility criteria, and the sources and methods of selection of participants. Describe methods of follow-up<br><i>Case-control study</i> —Give the eligibility criteria, and the sources and methods of case ascertainment and control selection. Give the rationale for the choice of cases and controls<br><i>Cross-sectional study</i> —Give the eligibility criteria, and the sources and methods of selection of participants | 5                  |
|                           |        | (b) <i>Cohort study</i> —For matched studies, give matching criteria and number of exposed and unexposed<br><i>Case-control study</i> —For matched studies, give matching criteria and the number of controls per case                                                                                                                                                                                                                                                 | 5                  |
| Variables                 | 7      | Clearly define all outcomes, exposures, predictors, potential confounders, and effect modifiers. Give diagnostic criteria, if applicable                                                                                                                                                                                                                                                                                                                               | 5-8                |
| Data sources/ measurement | 8*     | For each variable of interest, give sources of data and details of methods of assessment (measurement). Describe comparability of assessment methods if there is more than one group                                                                                                                                                                                                                                                                                   | 6-8                |
| Bias                      | 9      | Describe any efforts to address potential sources of bias                                                                                                                                                                                                                                                                                                                                                                                                              | 6                  |
| Study size                | 10     | Explain how the study size was arrived at                                                                                                                                                                                                                                                                                                                                                                                                                              | 6,Figure 1         |
| Quantitative variables    | 11     | Explain how quantitative variables were handled in the analyses. If applicable, describe which groupings were chosen and why                                                                                                                                                                                                                                                                                                                                           | 8                  |
| Statistical methods       | 12     | (a) Describe all statistical methods, including those used to control for confounding                                                                                                                                                                                                                                                                                                                                                                                  | 8-9                |
|                           |        | (b) Describe any methods used to examine subgroups and interactions                                                                                                                                                                                                                                                                                                                                                                                                    | 8                  |
|                           |        | (c) Explain how missing data were addressed                                                                                                                                                                                                                                                                                                                                                                                                                            | 6                  |
|                           |        | (d) <i>Cohort study</i> —If applicable, explain how loss to follow-up was addressed<br><i>Case-control study</i> —If applicable, explain how matching of cases and controls was addressed                                                                                                                                                                                                                                                                              | 6                  |

|                          |     |                                                                                                                                                                                                              |                               |
|--------------------------|-----|--------------------------------------------------------------------------------------------------------------------------------------------------------------------------------------------------------------|-------------------------------|
|                          |     | <i>Cross-sectional study</i> —If applicable, describe analytical methods taking account of sampling strategy                                                                                                 |                               |
|                          |     | (e) Describe any sensitivity analyses                                                                                                                                                                        |                               |
| <b>Results</b>           |     |                                                                                                                                                                                                              |                               |
| Participants             | 13* | (a) Report numbers of individuals at each stage of study—eg numbers potentially eligible, examined for eligibility, confirmed eligible, included in the study, completing follow-up, and analysed            | Figure 1                      |
|                          |     | (b) Give reasons for non-participation at each stage                                                                                                                                                         | 6                             |
|                          |     | (c) Consider use of a flow diagram                                                                                                                                                                           | Figure 1                      |
| Descriptive data         | 14* | (a) Give characteristics of study participants (eg demographic, clinical, social) and information on exposures and potential confounders                                                                     | Table 1                       |
|                          |     | (b) Indicate number of participants with missing data for each variable of interest                                                                                                                          | Table 1, Supplemental Table 1 |
|                          |     | (c) <i>Cohort study</i> —Summarise follow-up time (eg, average and total amount)                                                                                                                             | 5                             |
| Outcome data             | 15* | <i>Cohort study</i> —Report numbers of outcome events or summary measures over time                                                                                                                          | 8                             |
|                          |     | <i>Case-control study</i> —Report numbers in each exposure category, or summary measures of exposure                                                                                                         |                               |
|                          |     | <i>Cross-sectional study</i> —Report numbers of outcome events or summary measures                                                                                                                           |                               |
| Main results             | 16  | (a) Give unadjusted estimates and, if applicable, confounder-adjusted estimates and their precision (eg, 95% confidence interval). Make clear which confounders were adjusted for and why they were included | Table 3                       |
|                          |     | (b) Report category boundaries when continuous variables were categorized                                                                                                                                    | 8                             |
|                          |     | (c) If relevant, consider translating estimates of relative risk into absolute risk for a meaningful time period                                                                                             |                               |
| Other analyses           | 17  | Report other analyses done—eg analyses of subgroups and interactions, and sensitivity analyses                                                                                                               |                               |
| <b>Discussion</b>        |     |                                                                                                                                                                                                              |                               |
| Key results              | 18  | Summarise key results with reference to study objectives                                                                                                                                                     | 11                            |
| Limitations              | 19  | Discuss limitations of the study, taking into account sources of potential bias or imprecision. Discuss both direction and magnitude of any potential bias                                                   | 11                            |
| Interpretation           | 20  | Give a cautious overall interpretation of results considering objectives, limitations, multiplicity of analyses, results from similar studies, and other relevant evidence                                   | 11-12                         |
| Generalisability         | 21  | Discuss the generalisability (external validity) of the study results                                                                                                                                        | 13                            |
| <b>Other information</b> |     |                                                                                                                                                                                                              |                               |
| Funding                  | 22  | Give the source of funding and the role of the funders for the present study and, if applicable, for the original study on which the present article is based                                                | 15                            |

\*Give information separately for cases and controls in case-control studies and, if applicable, for exposed and unexposed groups in cohort and cross-sectional studies.

1  
2  
3  
4  
5  
6  
7  
8  
9  
10  
11  
12  
13  
14  
15  
16  
17  
18  
19  
20  
21  
22  
23  
24  
25  
26  
27  
28  
29  
30  
31  
32  
33  
34  
35  
36  
37  
38  
39  
40  
41  
42  
43  
44  
45  
46  
47  
48  
49

**Note:** An Explanation and Elaboration article discusses each checklist item and gives methodological background and published examples of transparent reporting. The STROBE checklist is best used in conjunction with this article (freely available on the Web sites of PLoS Medicine at <http://www.plosmedicine.org/>, Annals of Internal Medicine at <http://www.annals.org/>, and Epidemiology at <http://www.epidem.com/>). Information on the STROBE Initiative is available at [www.strobe-statement.org](http://www.strobe-statement.org).

For peer review only

# BMJ Open

## Infant BMI Peak as a predictor of overweight and obesity at age 2 years in a Chinese community-based cohort

|                                 |                                                                                                                                                                                                                                                                                                                                                                                                                                                                                                                                                                                                                                                                                                                                                                                                                 |
|---------------------------------|-----------------------------------------------------------------------------------------------------------------------------------------------------------------------------------------------------------------------------------------------------------------------------------------------------------------------------------------------------------------------------------------------------------------------------------------------------------------------------------------------------------------------------------------------------------------------------------------------------------------------------------------------------------------------------------------------------------------------------------------------------------------------------------------------------------------|
| Journal:                        | <i>BMJ Open</i>                                                                                                                                                                                                                                                                                                                                                                                                                                                                                                                                                                                                                                                                                                                                                                                                 |
| Manuscript ID                   | bmjopen-2016-015122.R3                                                                                                                                                                                                                                                                                                                                                                                                                                                                                                                                                                                                                                                                                                                                                                                          |
| Article Type:                   | Research                                                                                                                                                                                                                                                                                                                                                                                                                                                                                                                                                                                                                                                                                                                                                                                                        |
| Date Submitted by the Author:   | 06-Aug-2017                                                                                                                                                                                                                                                                                                                                                                                                                                                                                                                                                                                                                                                                                                                                                                                                     |
| Complete List of Authors:       | Sun, Jie; School of Public Health, Fudan, Department of Social Medicine; Jing'an Maternal and Child Health Care Center, Shanghai, Department of Child Health Care<br>Nwaru, Bright; The University Of Edinburgh, Allergy & Respiratory Research Group, Centre for Population Health Sciences; University of Tampere, School of Health Sciences<br>Hua, Jing; Shanghai First Maternity and Infant Hospital, Tongji University School of Medicine, Department of Maternal and Child Health Care<br>Li, Xiaohong; School of Public Health, Fudan University, Department of Health Policy and Management ; Innovation Center for Social Risk Governance in Health<br>Wu, Zhuochun; School of Public Health, Fudan University, Department of Social Medicine; Innovation Center for Social Risk Governance in Health |
| <b>Primary Subject Heading</b>: | Epidemiology                                                                                                                                                                                                                                                                                                                                                                                                                                                                                                                                                                                                                                                                                                                                                                                                    |
| Secondary Subject Heading:      | Paediatrics                                                                                                                                                                                                                                                                                                                                                                                                                                                                                                                                                                                                                                                                                                                                                                                                     |
| Keywords:                       | Overweight, Obesity, Body mass index, Longitudinal Study, Infant                                                                                                                                                                                                                                                                                                                                                                                                                                                                                                                                                                                                                                                                                                                                                |
|                                 |                                                                                                                                                                                                                                                                                                                                                                                                                                                                                                                                                                                                                                                                                                                                                                                                                 |

SCHOLARONE™  
Manuscripts



## Infant BMI peak as a predictor of overweight and obesity at age 2 years in a Chinese community-based cohort

Jie Sun<sup>1,2</sup>, Bright I Nwaru<sup>3,4,5</sup>, Jing Hua<sup>6</sup>, Xiaohong Li<sup>7,8</sup>, Zhuochun Wu<sup>1,8</sup>

### Abstract

**Objectives:** Infant body mass index (BMI) peak has proven to be a useful indicator for predicting childhood obesity risk in American and European populations. However, it has not been assessed in China. We characterized infant BMI trajectories in a Chinese longitudinal cohort and evaluated whether BMI peak can predict overweight and obesity at age 2 years.

**Methods:** Serial measurements (n=6-12) of weight and length were taken from healthy term infants (n=2073) in a birth cohort established in urban Shanghai. Measurements were used to estimate BMI growth curves from birth to 13.5 months using a polynomial regression model. BMI peak characteristics, including age (in months) and magnitude (BMI, in kg/m<sup>2</sup>) at peak and pre-peak velocities (in kg/m<sup>2</sup>/month), were estimated. The relationship between infant BMI peak and childhood BMI at age 2 years was examined using binary logistic analysis.

**Results:** Mean age at peak BMI was 7.61 months, with a magnitude of 18.33 kg/m<sup>2</sup>. Boys (n=1022) had a higher average peak BMI (18.60 vs. 18.07 kg/m<sup>2</sup>, P<0.001) and earlier average achievement of peak value (7.54 vs. 7.67 months, P<0.05) than girls (n=1051). With 1 kg/m<sup>2</sup> increase in peak BMI and one month increase in peak time, the risk of overweight at age 2 years increased by 2.11 times (OR 3.11; 95% CI 2.64-3.66) and 35% (OR 1.35; 95% CI 1.21-1.50), respectively. Similarly, higher BMI magnitude (OR 2.69; 95% CI 2.00-3.61) and later timing of infant BMI peak (OR 1.35; 95% CI 1.08-1.68) were associated with an increased risk of childhood obesity at age 2 years.

**Conclusions:** We have shown that infant BMI peak is valuable for predicting early childhood overweight and obesity in urban Shanghai. Because this is the first Chinese community-based cohort study of this nature, future research is required to examine infant populations in other areas of China.

**Key words:** Body mass Index, Obesity, Overweight, Longitudinal Study, Infants

**Word Count: 3883 words**

<sup>1</sup>Department of Social Medicine, School of Public Health, Fudan University, Shanghai, China.

<sup>2</sup>Department of Child Health Care, Jing'an Maternal and Child Health Care Center, Shanghai, China.

<sup>3</sup>School of Health Sciences, University of Tampere, Tampere, Finland.

<sup>4</sup>Asthma UK Centre for Applied Research, Usher Institute of Population Health Sciences and Informatics, University of Edinburgh, Edinburgh, UK.

<sup>5</sup>Krefting Research Centre, Institute of Medicine, University of Gothenburg, Gothenburg, Sweden

<sup>6</sup>Department of Maternal and Child Health Care, Shanghai First Maternity and Infant Hospital, Tongji University School of Medicine,

1  
2  
3 Shanghai, China.

4  
5 <sup>7</sup>Department of Health Policy and Management, School of Public Health, Fudan University, Shanghai,China.

6  
7 <sup>8</sup>Innovation Center for Social Risk Governance in Health, Fudan University, Shanghai, China

8  
9 Corresponding author: Zhuochun Wu, Department of Social Medicine, School of Public Health, Fudan University, Fax:  
10 086-021-62309139, P.O. Box 250,138 Yi Xue Yuan Road, Shanghai 200032, China . zcwu@shmu.edu.cn.

### 11 **Strengths and limitations of this study**

12  
13 The longitudinal cohort with careful repeated measurements of child growth parameters provided the  
14 opportunity to characterize infant BMI peak over the first year of life.

15  
16 As we lacked data on parent's BMI and pregnancy weight gain, we could not ascertain the influence of these on  
17 infant BMI peak and contribution to childhood overweight and obesity.

18  
19 Selection bias may exist in our study because 14.1% of the infants that were measured did not complete the  
20 follow-up at 2 years old.

### 21 **Introduction**

22  
23 The worldwide overweight prevalence among children aged under 5 years has risen from 4.8%  
24 in 1990 to 6.1% in 2014.<sup>(1)</sup> The current worldwide obesity epidemic is a serious public health  
25 crisis.<sup>(1-5)</sup> In 2014, almost half (48%) of obese individuals lived in Asia.<sup>(1)</sup> In urban areas of  
26 China, the prevalence of overweight increased from 5.3% in 2005 to 8.5% in 2010.<sup>(6)</sup> Rapid  
27 weight gain in early infancy is related to the adult development of obesity and cardiovascular  
28 risk factors, including hypertension and impaired glucose tolerance.<sup>(7-11)</sup> Environmental and  
29 behavioral factors are believed to be key drivers of obesity because although obesity is  
30 genetically influenced, genetic changes cannot explain the rapid increase in the prevalence  
31 of obesity.<sup>(12)</sup> Therapeutic interventions in adulthood have poor long-term effects and are not  
32 cost effective, therefore the introduction of primary preventive strategies during infancy may  
33 be more important to reduce the risk of being overweight and obese.<sup>(13-15)</sup>

34  
35 Body mass index (BMI), a useful estimate of adiposity for children aged more than two years,  
36 correlates with future health outcomes.<sup>(3, 7)</sup> A modest reduction in BMI z-score after one year  
37 of obesity intervention may improve several cardiovascular risk factors.<sup>(16)</sup> In young children,  
38 waist-to-height-ratio (WHtR) is not superior to BMI in estimating body fat percentage, nor is  
39 WHtR better correlated with cardiometabolic risk factors than BMI in overweight/obese

1  
2  
3 children.<sup>(17)</sup> One study in Singapore suggested that early BMI may have an important impact  
4  
5 on later metabolic outcomes in Asian populations.<sup>(18)</sup>  
6  
7

8  
9 Few studies have evaluated the associations between infant BMI trajectory and childhood  
10  
11 overweight and obesity.<sup>(12, 19-21)</sup> Weight-for-length percentile curves are often used but do not  
12  
13 account for the age-based changes that reflect different stages of infancy.<sup>(19)</sup> BMI increases  
14  
15 from birth and reaches a maximum called the 'BMI peak' around age 7-9 months old, and  
16  
17 then decreases and reaches a nadir around age 4-6 years old before increasing once  
18  
19 again.<sup>(19-21)</sup> According to Silverwood et al, both age and magnitude of BMI peak were  
20  
21 positively associated with later BMI z-scores.<sup>(20)</sup> Additionally, several studies have used  
22  
23 statistical models of growth trajectories to estimate the magnitude and timing of infant BMI  
24  
25 peak.<sup>(18-27)</sup>

26  
27 Ancestry-specific differences in Infant BMI peak are found between African-American and  
28  
29 European populations.<sup>(19)</sup> However, to date there have been no studies performed in China to  
30  
31 demonstrate the utility of infant BMI peak for predicting the risk of childhood overweight and  
32  
33 obesity. In order to form comparisons with other populations, we referred to a BMI modeling  
34  
35 set by a cohort study in Philadelphia, USA <sup>(19, 23)</sup> Using a community-based longitudinal data  
36  
37 set of serial measurements of length and weight from birth to childhood in Shanghai, we  
38  
39 aimed to estimate the BMI peak characteristics in order to study the association between the  
40  
41 infant BMI peak and overweight and obesity at age 2 years.  
42  
43  
44  
45

## 46 **Methods**

### 47 **Study Participants**

48  
49 We obtained our community-based longitudinal cohort data from the Shanghai Jing'an  
50  
51 District birth and health records. Shanghai has a population of 19 million, as of 2009, and is  
52  
53 divided into seventeen urban districts and one suburban district. Jing'an District is located at  
54  
55 the city center and has a population of 248,000, as of 2009. "Providing free of charge health  
56  
57  
58  
59  
60

1  
2  
3 examination to children aged 0-3 years" was a project funded by the Shanghai government  
4 for Jing'an children born from September 2009 onwards. Community health centers in the  
5 Jing'an District provide routine well-child checks for infants and young children. A District  
6 Childcare Database for all health centers in this project was established and managed by the  
7 Jing'an maternal and child health care center. For the Childcare Database, health center  
8 nurses record children's gender, gestational age, birthweight, feeding and sleeping behaviors,  
9 and other information during the child health examination. All children were followed from  
10 the age of one month to two or three years old until they went to kindergarten.  
11  
12

13  
14  
15 For this study, we used data from the Childcare Database for all children who were born from  
16 September 1st 2009 to September 1st 2013 and received care at the Jing'an District health  
17 centers. Children were followed from birth, with data collected at 1, 2, 4, 6, 9, 12, 18 and 24  
18 months of age from all five communities in Jing'an District, representing 69.9% (7456/10674)  
19 of all children in this age range in Jing'an District. Roughly 30% of children moved from  
20 Jing'an district to other districts of Shanghai during the study period, which resulted in a loss  
21 of follow-up in these cases. We gained approval (IRB#2015-TYSQ-03-11) for the current  
22 study from the Medical Research Ethics Committee, School of Public Health, Fudan  
23 University.  
24  
25  
26  
27  
28  
29  
30  
31  
32  
33  
34  
35  
36  
37  
38  
39  
40  
41

#### 42 **Inclusion and exclusion criteria**

43  
44 Inclusion criteria for the infants in this study specified healthy single births, a gestational age  
45 between 37 and 42 weeks, and no physical problems. Participants were included if they had  
46 at least six measurements of length and weight in the first 13.5 months of life. The number  
47 and range of measurements were determined by the BMI modeling set by a cohort study in  
48 Philadelphia, USA.<sup>(19, 23)</sup> Because the BMI peak occurs around 7-9 months old, we included  
49 children who had at least one health examination visit between 213-274 days old. To test the  
50 relationship between infant BMI peak and childhood overweight and obesity, we included  
51  
52  
53  
54  
55  
56  
57  
58  
59  
60

1  
2  
3 measurements for children at 2 years old when the data was available. Preterm infants (n =  
4 289), term twins (n = 52), post-term infants (n = 11), and term infants with congenital defects  
5 (n = 30) were excluded. These children have different curve characteristics than normal term  
6 children.<sup>(28)</sup> We used exclusion criteria similar to the Philadelphia cohort study to compare  
7 peak BMI with other populations.<sup>(19)</sup> There were 21.2% (2268/7456) infants eligible for  
8 analysis. Of these, we observed 85.9% (1949/2268) children from birth to age two years, i.e.  
9 until September 1st 2015 (Figure 1). To assess potential selection bias, we compared  
10 demographics and birth characteristics of the analytic sample (n=2268) to the excluded  
11 healthy singleton infants (n=4806). There were no substantial differences in sex, birthweight,  
12 maternal age or overweight and obese rates at age 2 years of the two samples.  
13 (Supplemental Table 1)  
14  
15  
16  
17  
18  
19  
20  
21  
22  
23  
24  
25  
26  
27  
28

### 29 **Anthropometric measures**

30  
31  
32 Weight and length of children were measured by the same type of instruments at the  
33 community health centers. Weight for infants (0-18 months) was measured by an electronic  
34 pediatric scale (SECA 376 Weighing Scale) to the nearest 0.005 kg. Weight for toddlers  
35 (19-24 months) was measured by another type of scale (SECA 704c Weighing Scale) to the  
36 nearest 0.05 kg. Recumbent length was measured from the top of the head to soles of feet  
37 using an infant mat (SECA416 Mobile Measuring Mat) to the nearest 0.1 cm. BMI z-score  
38 (BAZ) of children at age two years were calculated according to the 2006 World Health  
39 Organization (WHO) Child Growth Standards using the WHO Anthro 2009 software.<sup>(29)</sup> The  
40 WHO Child Growth Standards was based on a multi-country study involving breastfed  
41 children from six geographically distinct sites.<sup>(1)</sup> Overweight was defined as BAZ > +1  
42 (BMI >85th percentile) while obesity was defined as BAZ > + 2 (BMI >97th percentile). Normal  
43 weight was defined as  $-1 \leq \text{BAZ} \leq +1$ .<sup>(2, 13)</sup> Based on reports from previous studies,<sup>(11, 12, 19, 21)</sup>  
44 we extracted factors associated with childhood overweight from the electronic medical  
45 records. These factors were birthweight, sex, delivery mode, maternal age, duration of  
46  
47  
48  
49  
50  
51  
52  
53  
54  
55  
56  
57  
58  
59  
60

breastfeeding and sleeping data. Parents answered to feeding and sleeping questions in follow-ups. They reported the age in months at which breastfeeding was stopped. Sleep duration in hours was recorded at age 2 years. Because this cohort was set up after birth, some information about pregnancy and parents information was not available.

### BMI trajectory modeling

BMI peak was identified from subject-specific BMI growth curves established by serial BMI measurements. (Figure 2) A polynomial regression model with quadratic terms was fit to the BMI measurements over time. Regression modeling was used for each child to fit the following equation: <sup>(19)</sup>

$$BMI = \beta_0 + \beta_1(\text{age in days}) + \beta_2(\text{age in days})^2$$

The first inflection point occurred at less than 408 days as derived from the equation and this was identified as BMI peak. The magnitude and timing of BMI peak were found by taking derivatives as follows:

$$BMI' = 2\beta_2(\text{age in days}) + \beta_1 = 0$$

Thus,

$$T_{peak} = -\frac{\beta_1}{2\beta_2}$$

$$BMI_{peak} = \frac{4\beta_0\beta_2 - \beta_1^2}{4\beta_2}$$

$T_{peak}$  is the timing of BMI peak and  $BMI_{peak}$  is the magnitude of BMI peak.

The pre-peak velocity was calculated using the following equation, with BMI at 14 days of age as the baseline measurement to avoid the period of neonatal weight loss seen in the first two weeks of life.<sup>(21)</sup>

$$(BMI_{Peak} - BMI_{14days}) / (T_{peak} - 14 \text{ days}).$$

The subjects who had a BMI peak within 14 – 408 days of life were defined as estimable (“fit”) BMI trajectories, while those who were not identifiable by the model were called inestimable (“not fit”) BMI trajectories.<sup>(19)</sup>

### Statistical analysis

SPSS 20.0 statistical software was used for all analyses and metalab2014b for the BMI trajectory modeling. Data were presented as mean with 95% confidence interval. Categorical data were summarized by calculating percentages. The chi-square test and two-sampled t tests were used to examine the differences between participants whose BMI trajectories were estimable or inestimable for the quadratic regression model and those who did or did not have measurements at age two years. We classified birthweight as the following categories: 1.5 to less than 2.5 kg, 2.5 to less than 4 kg, and equal to or greater than 4 kg in the chi-square test. (Table 1)

To evaluate the associations between covariates and infant BMI peak characteristics and childhood BMI Z-scores, bivariate analyses were used by one-way ANOVA with post hoc Bonferroni adjustments. (Table 2) BMI peak characteristics [age (in months) and magnitude (BMI; in kg/m<sup>2</sup>) at peak and pre-peak velocities (kg/m<sup>2</sup>/month)] were estimated. The correlations between the estimated BMI peak characteristics were assessed by Pearson correlation analysis. (Supplemental Table 2) Logistic regression was used to assess the associations between BMI peak characteristics and childhood overweight (BAZ > +1) or obesity (BAZ > +2), adjusting for other background characteristics. Gender, delivery mode and maternal ages were defined as categorical variables. Birthweight, duration of breastfeeding and sleeping were defined as continuous variable. We derived birthweight-for-gestational-age z-scores using references from International standards for newborn.<sup>(30)</sup> (Table 3) The coefficient of determination denoted R<sup>2</sup> was used to describe the fit of every subject-specific curve. Statistical analyses were performed using only the subjects

1  
2  
3 with estimable BMI peak.<sup>(19-22)</sup> All statistical tests were two-tailed and P values <0.05 were  
4  
5 considered statistically significant.  
6  
7  
8  
9  
10  
11  
12  
13  
14  
15  
16  
17  
18  
19  
20  
21  
22  
23  
24  
25  
26  
27  
28  
29  
30  
31  
32  
33  
34  
35  
36  
37  
38  
39  
40  
41  
42  
43  
44  
45  
46  
47  
48  
49  
50  
51  
52  
53  
54  
55  
56  
57  
58  
59  
60

For peer review only



## Results

### Description of the study population

The demographic characteristics of the study population are presented in Table 1. There were 2268 infants eligible for analysis, 49.6% male and 50.4% female. Most had a normal birthweight of 2.5 to less than 4 kg (n=2073, 91.4%). Eighty-five percent (n =1949) of infants had follow-up data at least through the age of 2 years (Table 1). Evaluated by the WHO Child Growth Standards, 17.0% (n =332) infants were overweight (BAZ > +1) and 2.3% (n =44) obese (BAZ > +2) at age 2 years.

### Results of infant BMI trajectory modeling

Individual BMI trajectories were estimable using the polynomial regression model for 91.4% of the sample, with reasonable fit (mean  $R^2=0.70\pm 0.23$ ). Mean magnitude of BMI peak was 18.33 (95% CI 18.26-18.39)  $\text{kg/m}^2$  and occurred at 7.61 (95% CI 7.55-7.67) months. (Supplemental Figure1) Those subjects with inestimable BMI peak mostly showed either a BMI peak after 408 days of life or a decrease in BMI after birth. The prevalence of macrosomia (birthweight>4kg) infants with inestimable infancy BMI peak were higher than that with estimable ones (6.7% vs 11.3%,  $P =0.024$ ). Heavier macrosomia infants reached their BMI peak much earlier than other infants, since some of them attained BMI peak measurements just after birth. There was no significant difference in other factors between subjects with estimable and inestimable peak BMI ( $P>0.05$ ). (Table 1)

### *Participants' characteristics in relation to infant BMI trajectories*

Infant BMI trajectories were related to both sex and birthweight (Table 2). The magnitude of BMI peak was greater, and timing of peak BMI was earlier, in boys than in girls and in children of higher birthweight than those of lower birthweight. There was no statistical significant difference in pre-peak velocities with regards to infant characteristics.

### ***General characteristics of children at age two years***

We tested for differences between infants who had BMI data with estimable BMI peak at age two years (n=1790) vs. those who did not (n=159). There was no statistical difference between the two groups in sex, birthweight, maternal age, duration of breastfeeding, duration of sleep and overweight rates at age 2 years. ( $P > 0.05$ ).

### ***Association between infant BMI peak and childhood overweight and obesity***

Table 3 shows the results of the association between BMI peak and risk of overweight and obesity at two years of age. When only the infant BMI peak was included in the model, higher magnitude and later timing of infant BMI peak increased the risk of overweight at two years. Furthermore, after adjustment for other infant background factors, higher magnitude (OR 3.11; 95% CI 2.64–3.66) and later timing (OR 1.35; 95% CI 1.21-1.50) of infant BMI peak each increased the risk of overweight at two years. The results were also similar with regards to childhood obesity (Table 3).

## Discussion

Using a longitudinal set from a community-based cohort, we have demonstrated in the current analysis that infant BMI peak is useful for predicting childhood overweight and obesity in urban China. Boys had a higher average BMI peak and earlier average timing to achieve peak BMI than girls. Principally, our results show that higher BMI magnitude and later timing of infant BMI peak were each associated with increased risk of early childhood overweight and obesity.

This is the first community-based cohort study in China to characterize infant BMI peak and evaluate its association with risk of being overweight and obesity in early childhood. There have been remarkable increases in overweight and obesity in both rural and urban areas of China.<sup>(31)</sup> Our findings can therefore be generalized to similarly aged children in Shanghai city and, to some degree, be extended to other areas in China. The longitudinal nature of the cohort data and the repeated measurements of length and weight parameters provided us with the opportunity to carefully model infant BMI trajectories of infants over the course of the first year of life. A limitation of our investigation was that only about 69.9% (7456/10674) of all children in this age range had health records that only 85.9% of eligible children had complete follow-up data up to 2 years of age. Because children with incomplete data were excluded from the analysis, the risk of selection bias cannot be totally ruled out. Another weakness of the study is that the data concerning parent's BMI, pregnancy weight gain, gestational diabetes mellitus and income were not available, because the cohort was defined after birth and not prenatally. Additionally, the reliability of the anthropometric measurements could not be ascertained due to the retrospective nature of the cohort. We acknowledge that the generated from routinely collected data may potentially influence the generalizability of the findings. Finally, the recorded BMI peak is estimation and not the true peak. Use of estimated BMI peak is potentially related to uncertainty in subsequent regression models.<sup>(18)</sup>

Few studies have investigated the utility of infant BMI peak in predicting childhood overweight and obesity.<sup>(19-21)</sup> Principally, we found that higher BMI magnitude and later timing of infant

1  
2  
3 BMI peak were each associated with increased risk of early childhood overweight and obesity.  
4  
5 This result is similar to previous research from the cohort study conducted in USA<sup>(19)</sup> and the  
6  
7 Uppsala Family Study in Europe.<sup>(20)</sup> However, some of our findings are not consistent with  
8  
9 previous research. A 2010 prospective cohort study showed that more rapid increases in  
10  
11 weight for length in the first six months of life were associated with a sharp increase in  
12  
13 childhood obesity risk.<sup>(32)</sup> Although most previous studies used weight or BMI at  
14  
15 study-dependent fixed ages,<sup>(32, 33)</sup> our work was based on longitudinal and repeated  
16  
17 measures of length and weight. Our results also demonstrate the differences in sex and  
18  
19 birthweight were associated with BMI magnitude and timing of the BMI peak, but not with  
20  
21 pre-peak velocity.<sup>(19, 21)</sup> In recent studies, later timing of the BMI peak was observed in both  
22  
23 girls and boys (8-9 months of age) from European or American populations.<sup>(20, 21, 23)</sup> Girls  
24  
25 peaked slightly later than boys in both populations. However, one recent study conducted in  
26  
27 Singapore suggested that Asian children peak earlier (6 months) than European or American  
28  
29 children and that sex does not significantly influence age at BMI peak in Asian infants.  
30  
31 Notably, that study used natural cubic splines, compared to our analysis that used a  
32  
33 polynomial regression model. It is possible that the use of different modeling methods to  
34  
35 derive BMI peak characteristics could account for the observed differences across  
36  
37 populations.<sup>(18)</sup> Also, the effect of breastfeeding may also explain the different ages of BMI  
38  
39 peak observed across genders and populations. Further research is needed to demonstrate  
40  
41 the clinical relevance of these small differences in BMI peak across populations. Furthermore,  
42  
43 a previous study found a positive association between an earlier and higher BMI peak and  
44  
45 birthweight.<sup>(19, 20)</sup> In our study, higher birthweight was not associated with a lower velocity,  
46  
47 which was found by the Philadelphia cohort study.<sup>(19)</sup>

48  
49 There is no widely accepted method to model infant BMI peak, appropriate peak age range  
50  
51 and the number and timing of serial measurements.<sup>(23)</sup> China is undergoing rapid social and  
52  
53 economic developments, which is accompanied by an improvement in nutritional status.  
54  
55 Current estimates indicate that overweight and obesity are rising in China, including in  
56  
57 children.<sup>(5)</sup> However, there has been a lack of studies evaluating the utility of BMI peak for  
58  
59

1  
2  
3 predicting risk for being overweight or obese in later childhood in China, although BMI peak  
4 has been demonstrated to be ancestry-specific.<sup>(19)</sup> Therefore, these findings can be used to  
5 help predict the early onset of obesity and to serve as a springboard for planning appropriate  
6 interventions to reduce the increasing trend of childhood overweightness and obesity in  
7 urban China. It is unclear why infants in our study had earlier BMI peaks (7-8 months) than  
8 infants from America and Europe (8-9 months),<sup>(20, 21, 23)</sup> but it has been demonstrated that  
9 such differences may reflect ancestry-specific BMI peaks across populations.<sup>(19)</sup> For this  
10 reason, cross-cultural investigations are required to determine the validity of this assertion.  
11 Understanding these differences may influence the design of public health intervention  
12 protocols to address childhood obesity.<sup>(34-36)</sup>

## 23 **Conclusion**

24  
25  
26 Using a community-based longitudinal cohort study with repeated measurements of infant  
27 growth parameters, we have for the first time determined that infant BMI peak is a useful  
28 metric to predict early childhood overweight and obesity in urban China. Our findings suggest  
29 that higher magnitude and later timing of infant BMI peak increased the risk of early childhood  
30 overweight and obesity. Infancy therefore represents a critical window of opportunity to  
31 prevent the emerging epidemic of overweight and obesity in children. Further studies from  
32 other urban populations in China are required in order to confirm or question our  
33 observations.  
34  
35  
36  
37  
38  
39  
40  
41  
42  
43  
44  
45  
46  
47  
48  
49  
50  
51  
52  
53  
54  
55  
56  
57  
58  
59  
60

## Acknowledgements

We are grateful to the staff in Jing'an maternal and child health care center for data extraction.

We also acknowledge all children and their parent's for participation.

## Authors' contributions

JieSun, Bright I Nwaru, and ZhuochunWu were responsible for the study design, analysis of the study and approval of the submitted and final version. Jing Hua and Xiaohong Li analyzed the data, interpreted the results and commented on the manuscript.

## Funding

This study was funded by National Natural Science Foundation of China [71573049].

## Ethics Approval

All procedures performed in this study were in accordance with the ethical standard. We gained approval (IRB#2015-TYSQ-03-11) for the current study from the Medical Research Ethics Committee, School of Public Health, Fudan University. Informed consent was obtained from all individual participants included in the study.

## Competing interests

The authors declare that they have no conflict of interest.

## Data Sharing Statement

No additional data are available.

**References:**

1. Commission presents its final report, calling for high-level action to address major health challenge. Available from <http://www.who.int/end-childhood-obesity/news/launch-final-report/en/>. 2016.
2. Benjamin Neelon SE, Schou Andersen C, Schmidt Morgen C, Kamper-Jorgensen M, Oken E, Gillman MW, et al. Early child care and obesity at 12 months of age in the Danish National Birth Cohort. *International journal of obesity* (2005). 2015;39(1):33-8.
3. Freedman DS, Mei Z, Srinivasan SR, Berenson GS, Dietz WH. Cardiovascular risk factors and excess adiposity among overweight children and adolescents: the Bogalusa Heart Study. *The Journal of pediatrics*. 2007;150(1):12-7.e2.
4. Skinner AC, Perrin EM, Skelton JA. Prevalence of obesity and severe obesity in US children, 1999-2014. *Obesity* (Silver Spring, Md). 2016;24(5):1116-23.
5. Ji CY. Report on childhood obesity in China (4) prevalence and trends of overweight and obesity in Chinese urban school-age children and adolescents, 1985-2000. *Biomedical and environmental sciences : BES*. 2007;20(1):1-10.
6. Commission. CNhaFP. National Report on Nutritional status of children aged 0-6 year. China:National health and Family Planning Commission. China;. 2012.
7. Andersen LG, Holst C, Michaelsen KF, Baker JL, Sorensen TI. Weight and weight gain during early infancy predict childhood obesity: a case-cohort study. *International journal of obesity* (2005). 2012;36(10):1306-11.
8. Baird J, Fisher D, Lucas P, Kleijnen J, Roberts H, Law C. Being big or growing fast: systematic review of size and growth in infancy and later obesity. *BMJ (Clinical research ed)*. 2005;331(7522):929.
9. Leunissen RW, Kerkhof GF, Stijnen T, Hokken-Koelega A. Timing and tempo of first-year rapid growth in relation to cardiovascular and metabolic risk profile in early adulthood. *Jama*. 2009;301(21):2234-42.
10. Monteiro PO, Victora CG. Rapid growth in infancy and childhood and obesity in later life--a systematic review. *Obesity reviews : an official journal of the International Association for the Study of Obesity*. 2005;6(2):143-54.
11. Weng SF, Redsell SA, Swift JA, Yang M, Glazebrook CP. Systematic review and meta-analyses of risk factors for childhood overweight identifiable during infancy. *Archives of disease in childhood*. 2012;97(12):1019-26.
12. Guo Y. Growth level of urban Chinese infants from birth to 2 years, body mass index Z scores' predicting model and its age trajectory in relation to maternal pre-pregnancy body weight status. 2013.
13. Ma JQ, Zhou LL, Hu YQ, Liu SS, Sheng XY. Association between feeding practices and weight status in young children. *BMC pediatrics*. 2015;15:97.
14. Gortmaker SL, Swinburn BA, Levy D, Carter R, Mabry PL, Finegood DT, et al. Changing the future of obesity: science, policy, and action. *Lancet (London, England)*. 2011;378(9793):838-47.
15. Robinson SM, Crozier SR, Harvey NC, Barton BD, Law CM, Godfrey KM, et al. Modifiable early-life risk factors for childhood adiposity and overweight: an analysis of their combined impact and potential for prevention. *The American journal of clinical nutrition*. 2015;101(2):368-75.
16. Kolsgaard ML, Joner G, Brunborg C, Anderssen SA, Tonstad S, Andersen LF. Reduction in BMI z-score and improvement in cardiometabolic risk factors in obese children and adolescents. *The Oslo Adiposity*

- 1  
2  
3 Intervention Study - a hospital/public health nurse combined treatment. BMC pediatrics. 2011;11:47.
- 4 17. Sijtsma A, Bocca G, L'Abée C, Liem ET, Sauer PJ, Corpeleijn E. Waist-to-height ratio, waist  
5 circumference and BMI as indicators of percentage fat mass and cardiometabolic risk factors in children  
6 aged 3-7 years. Clinical nutrition (Edinburgh, Scotland). 2014;33(2):311-5.
- 7 18. Aris IM, Bernard JY, Chen LW, Tint MT, Pang WW, Lim WY, et al. Infant body mass index peak and early  
8 childhood cardio-metabolic risk markers in a multi-ethnic Asian birth cohort. International journal of  
9 epidemiology. 2016.
- 10 19. Roy SM, Chesi A, Mentch F, Xiao R, Chiavacci R, Mitchell JA, et al. Body mass index (BMI) trajectories  
11 in infancy differ by population ancestry and may presage disparities in early childhood obesity. The  
12 Journal of clinical endocrinology and metabolism. 2015;100(4):1551-60.
- 13 20. Silverwood RJ, De Stavola BL, Cole TJ, Leon DA. BMI peak in infancy as a predictor for later BMI in the  
14 Uppsala Family Study. International journal of obesity (2005). 2009;33(8):929-37.
- 15 21. Jensen SM, Ritz C, Ejlerskov KT, Molgaard C, Michaelsen KF. Infant BMI peak, breastfeeding, and body  
16 composition at age 3 y. The American journal of clinical nutrition. 2015;101(2):319-25.
- 17 22. WHO Multicentre Growth Reference Study Group. WHO Child Growth Standards:  
18 Length/height-for-age, Weight-for-age, Weight-for-length, Weight-for-height, and Body Mass  
19 Index-for-age: Methods and Development. Geneva:World Health Organization,2006. Available from:  
20 <http://www.who.int/childgrowth/standards/en/>. 2006.
- 21 23. Wen X, Kleinman K, Gillman MW, Rifas-Shiman SL, Taveras EM. Childhood body mass index  
22 trajectories: modeling, characterizing, pairwise correlations and socio-demographic predictors of  
23 trajectory characteristics. BMC medical research methodology. 2012;12:38.
- 24 24. Chivers P, Hands B, Parker H, Bulsara M, Beilin LJ, Kendall GE, et al. Body mass index, adiposity  
25 rebound and early feeding in a longitudinal cohort (Raine Study). International journal of obesity (2005).  
26 2010;34(7):1169-76.
- 27 25. Johnson W, Choh AC, Lee M, Towne B, Czerwinski SA, Demerath EW. Characterization of the infant  
28 BMI peak: sex differences, birth year cohort effects, association with concurrent adiposity, and heritability.  
29 American journal of human biology : the official journal of the Human Biology Council.  
30 2013;25(3):378-88.
- 31 26. Giles LC, Whitrow MJ, Davies MJ, Davies CE, Rumbold AR, Moore VM. Growth trajectories in early  
32 childhood, their relationship with antenatal and postnatal factors, and development of obesity by age 9  
33 years: results from an Australian birth cohort study. International journal of obesity (2005).  
34 2015;39(7):1049-56.
- 35 27. Sovio U, Kaakinen M, Tzoulaki I, Das S, Ruokonen A, Pouta A, et al. How do changes in body mass  
36 index in infancy and childhood associate with cardiometabolic profile in adulthood? Findings from the  
37 Northern Finland Birth Cohort 1966 Study. International journal of obesity (2005). 2014;38(1):53-9.
- 38 28. Fenton TR, Nasser R, Eliasziw M, Kim JH, Bilan D, Sauve R. Validating the weight gain of preterm  
39 infants between the reference growth curve of the fetus and the term infant. BMC pediatrics. 2013;13:92.
- 40 29. WHO. Anthro for personal computers, version 3. Software for assessing growth and development of  
41 the world's children. Geneva: WHO,2009. Available from: <http://www.who.int/childgrowth/software/en/>.  
42 2009.
- 43 30. Villar J, Cheikh Ismail L, Victora CG, Ohuma EO, Bertino E, Altman DG, et al. International standards  
44 for newborn weight, length, and head circumference by gestational age and sex: the Newborn  
45  
46  
47  
48  
49  
50  
51  
52  
53  
54  
55  
56  
57  
58  
59  
60



1  
2  
3 Cross-Sectional Study of the INTERGROWTH-21st Project. *Lancet* (London, England).  
4 2014;384(9946):857-68.

5  
6 31. Zhang YX, Wang SR. Rural-urban comparison in prevalence of overweight and obesity among  
7 adolescents in Shandong, China. *Annals of human biology*. 2013;40(3):294-7.

8  
9 32. Taveras EM, Rifas-Shiman SL, Belfort MB, Kleinman KP, Oken E, Gillman MW. Weight status in the first  
10 6 months of life and obesity at 3 years of age. *Pediatrics*. 2009;123(4):1177-83.

11  
12 33. Guo B, Mei H, Yang S, Zhang J. [Prenatal factors associated with high BMI status of infants and  
13 toddlers]. *Zhonghua er ke za zhi = Chinese journal of pediatrics*. 2014;52(6):464-7.

14  
15 34. Taveras EM, Gillman MW, Kleinman K, Rich-Edwards JW, Rifas-Shiman SL. Racial/ethnic differences  
16 in early-life risk factors for childhood obesity. *Pediatrics*. 2010;125(4):686-95.

17  
18 35. Taveras EM, Gillman MW, Kleinman KP, Rich-Edwards JW, Rifas-Shiman SL. Reducing racial/ethnic  
19 disparities in childhood obesity: the role of early life risk factors. *JAMA pediatrics*. 2013;167(8):731-8.

20  
21 36. Zilanawala A, Davis-Kean P, Nazroo J, Sacker A, Simonton S, Kelly Y. Race/ethnic disparities in early  
22 childhood BMI, obesity and overweight in the United Kingdom and United States. *International journal of  
23 obesity (2005)*. 2015;39(3):520-9.

**Table 1** Participants' characteristics by subjects with "estimable"\* and "inestimable"# BMI peak

| Characteristics                                | n          | Estimable*, n (%)            | Inestimable#, n (%) |
|------------------------------------------------|------------|------------------------------|---------------------|
| Total number                                   | 2268       | 2073                         | 195                 |
| Gender                                         |            |                              |                     |
| Male                                           | 1126       | 1022 (49.3)                  | 104 (53.3)          |
| Female                                         | 1142       | 1051 (50.7)                  | 91 (46.7)           |
| Birth weight                                   |            |                              |                     |
| 1.5 to <2.5kg                                  | 35         | 30 (1.4)                     | 5 (2.6)             |
| 2.5 to <4.0kg                                  | 2073       | 1905 (91.9)                  | 168 (86.2)          |
| <b>≥4kg</b>                                    | <b>160</b> | <b>138 (6.7)<sup>a</sup></b> | <b>22 (11.3)</b>    |
| Delivery mode                                  |            |                              |                     |
| Vaginal birth                                  | 1086       | 989 (47.7)                   | 97 (49.7)           |
| Cesarean section                               | 1182       | 1084 (52.3)                  | 98 (50.3)           |
| Maternal Age                                   |            |                              |                     |
| >35y                                           | 176        | 159 (7.7)                    | 17 (8.7)            |
| ≤35y                                           | 2092       | 1914 (92.3)                  | 178 (91.3)          |
| Total number with data at age 2y               | 1949       | 1790 (86.3)                  | 159 (81.5)          |
| Total number of overweight and obese at age 2y | 332        | 313 (17.5)                   | 19 (11.9)           |
| Total number of obese at age 2y                | 44         | 43 (2.4)                     | 1 (0.6)             |

a.P<0.05

\*Estimable: fit and identifiable BMI peak within 14–408 days of life.

# Inestimable: Not fit and identifiable.

Chi-square tests were used to examine the differences between Estimable or Inestimable group.

**Table 2 Infant characteristics in relation to infant BMI peak trajectories**

|                  |                                      | Magnitude(kg/m <sup>2</sup> ),<br>Mean (95% CI) | Age(months),<br>Mean (95% CI)      | Pre-peak<br>velocities(kg/m <sup>2</sup><br>/month)<br>Mean (95% CI) |
|------------------|--------------------------------------|-------------------------------------------------|------------------------------------|----------------------------------------------------------------------|
| Total            | n=2073                               | 18.33(18.26-18.39)                              | 7.61(7.55-7.67)                    | 0.43(0.42-0.44)                                                      |
| Gender           |                                      |                                                 |                                    |                                                                      |
|                  | <b>male (n=1022)</b>                 | <b>18.60(18.21-18.69)<sup>a</sup></b>           | <b>7.54(7.46-7.63)<sup>b</sup></b> | 0.42(0.41-0.43)                                                      |
|                  | female (n=1051)                      | 18.07(17.98-18.16)                              | 7.67(7.59-7.76)                    | 0.43(0.42-0.44)                                                      |
| Birth<br>Weight  |                                      |                                                 |                                    |                                                                      |
|                  | 1.5 to<br><2.5kg(n=30)               | 17.63(17.13-18.13)                              | 8.13(7.56-8.70)                    | 0.44(0.35-0.53)                                                      |
|                  | 2.5 to<br><4.0kg(n=1905)             | 18.27(18.21-18.34)                              | 7.63(7.57-7.70)                    | 0.43(0.42-0.44)                                                      |
|                  | <b>&gt;=4kg(n=138)</b>               | <b>19.25(18.97-19.52)<sup>b</sup></b>           | <b>7.11(6.88-7.34)<sup>a</sup></b> | 0.39(0.35-0.42)                                                      |
| Delivery<br>Mode |                                      |                                                 |                                    |                                                                      |
|                  | Vaginal birth<br>(n=989)             | 18.24(18.14-18.34)                              | 7.64(7.56-7.73)                    | 0.43(0.42-0.44)                                                      |
|                  | <b>Cesarean section<br/>(n=1084)</b> | <b>18.41(18.32-18.50)<sup>a</sup></b>           | 7.58(7.49-7.66)                    | 0.43(0.42-0.44)                                                      |
| Maternal<br>Age  |                                      |                                                 |                                    |                                                                      |
|                  | >35y(n=159)                          | 18.42(18.18-18.66)                              | 7.61(7.49-7.82)                    | 0.44(0.41-0.48)                                                      |
|                  | <=35y(n=1914)                        | 18.32(18.25-18.39)                              | 7.61(7.55-7.67)                    | 0.42(0.41-0.43)                                                      |

a.P<0.001 b.P<0.05

The analysis includes only infants who had BMI peak within 0-408 days and whose BMI trajectories were estimable by the quadratic model.

Bivariate comparison was performed using one-way ANOVA with post hoc Bonferroni multiple comparison test.

**Table 3 Association between BMI peak characteristics and overweight and obesity at age 2 years**

|                                               | Overweight at 2y (n=1790)                                    |                                              | Obesity at 2y (n=1790)                                       |                                              |
|-----------------------------------------------|--------------------------------------------------------------|----------------------------------------------|--------------------------------------------------------------|----------------------------------------------|
|                                               | Model containing infant BMI trajectory characteristics alone | Initial model plus all independent variables | Model containing infant BMI trajectory characteristics alone | Initial model plus all independent variables |
|                                               | OR (95% CI)                                                  | OR (95% CI)                                  | OR (95% CI)                                                  | OR (95% CI)                                  |
| Magnitude(kg/m <sup>2</sup> )                 | <b>2.94(2.54-3.40)<sup>a</sup></b>                           | <b>3.11(2.64-3.66)<sup>a</sup></b>           | <b>2.76(2.11-3.60)<sup>a</sup></b>                           | <b>2.69(2.00-3.61)<sup>a</sup></b>           |
| Age (months)                                  | <b>1.36(1.23-1.51)<sup>a</sup></b>                           | <b>1.35(1.21-1.50)<sup>a</sup></b>           | <b>1.33(1.08-1.65)<sup>b</sup></b>                           | <b>1.35(1.08-1.68)<sup>b</sup></b>           |
| Pre-peak velocities(kg/m <sup>2</sup> /month) | <b>0.17(0.07-0.40)<sup>a</sup></b>                           | <b>0.14(0.06-0.34)<sup>a</sup></b>           | <b>0.10(0.02-0.56)<sup>b</sup></b>                           | <b>0.12(0.02-0.74)<sup>c</sup></b>           |
| male(vs female)                               |                                                              | <b>0.67(0.49-0.90)<sup>b</sup></b>           |                                                              | 0.99(0.51-1.96)                              |
| birth weight z score.(continuous)             |                                                              | 1.06(0.89-1.26)                              |                                                              | 1.24(0.84-1.82)                              |
| Duration of breastfeeding(continuous)         |                                                              | 0.97(0.93-1.01)                              |                                                              | 0.92(0.84-1.01)                              |
| Duration of Sleep(continuous)                 |                                                              | 0.89(0.77-1.02)                              |                                                              | 0.89(0.63-1.24)                              |
| Cesarean section(vs Vaginal Birth)            |                                                              | 1.08(0.81-1.44)                              |                                                              | 0.80(0.42-1.54)                              |
| Mother Age(>35y vs<=35y)                      |                                                              | 0.68(0.38-1.21)                              |                                                              | 0.74(0.21-2.59)                              |

a.P<0.001 b.P<0.01 c.P<0.05

The analysis includes only infants who had BMI peak within 0-408 days and whose BMI trajectories were estimable by the quadratic model.

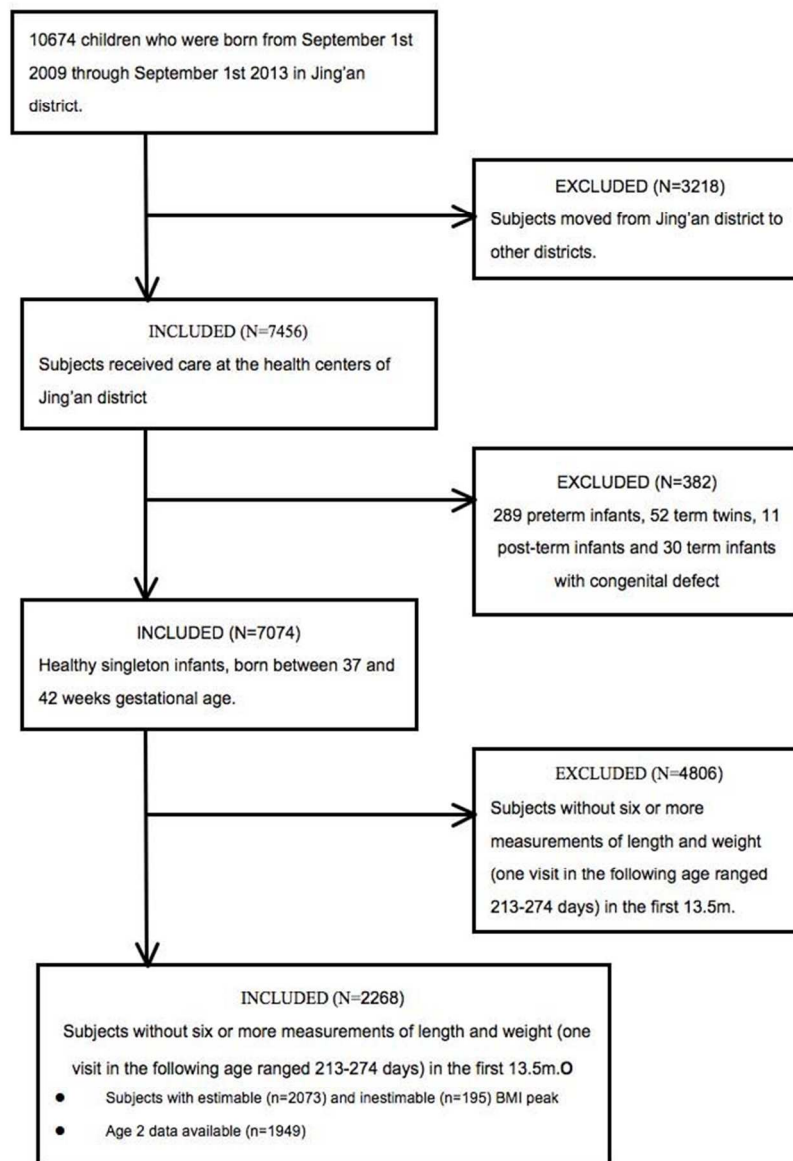

Figure1 Recruitment flow chart and study sample

64x83mm (300 x 300 DPI)



Figure 2 Plot of BMI data by age from birth to 13.5 months

169x127mm (300 x 300 DPI)

**Supplemental Table 1 Characteristics of the analytic and excluded healthy singleton infants**

| Characteristics                                | n           | Included, n (%)                | Excluded, n (%)    |
|------------------------------------------------|-------------|--------------------------------|--------------------|
| Total number                                   | 7074        | 2268(32.1)                     | 4806(67.9)         |
| Gender                                         |             |                                |                    |
| Male                                           | 3468        | 1126 (49.6)                    | 2342 (48.7)        |
| Female                                         | 3606        | 1142(50.4)                     | 2464 (51.3)        |
| Birth weight                                   |             |                                |                    |
| <4.0kg                                         | 6609        | 2108(92.9)                     | 4501 (93.7)        |
| ≥4kg                                           | 465         | 160 (7.1)                      | 305(6.3)           |
| Maternal Age                                   |             |                                |                    |
| >35y                                           | 570         | 176 (7.8)                      | 394 (8.2)          |
| ≤35y                                           | 6504        | 2092(92.2)                     | 4412(91.8)         |
| Total number with data at age 2y               | <b>1949</b> | <b>1949 (85.9)<sup>a</sup></b> | <b>2282 (47.4)</b> |
| Total number of overweight and obese at age 2y | 751         | 330 (16.9)                     | 421 (18.4)         |
| Total number of obese at age 2y                | 99          | 44 (2.3)                       | 55(2.4)            |

a.P<0.05

Chi-square tests were used to examine the differences between included or excluded group.

**Supplemental Table 2: Correlation matrix of infancy BMI characteristics**

|                                          | Age of BMI Peak, mo | Pre-peak velocities, kg/m <sup>2</sup> /mo |
|------------------------------------------|---------------------|--------------------------------------------|
| Magnitude of BMI peak, kg/m <sup>2</sup> | 0.03                | 0.654**                                    |
| Age of BMI Peak, mo                      |                     | 0.09**                                     |

Significance is noted as: \*\* p ≤ 0.01.



**Supplemental Figure1 Infant Estimated BMI trajectory by polynomial regression model**

Only



**STROBE 2007 (v4) checklist of items to be included in reports of observational studies in epidemiology\***  
**Checklist for cohort, case-control, and cross-sectional studies (combined)**

| Section/Topic             | Item # | Recommendation                                                                                                                                                                                                                                                                                                                                                                                                                                                         | Reported on page # |
|---------------------------|--------|------------------------------------------------------------------------------------------------------------------------------------------------------------------------------------------------------------------------------------------------------------------------------------------------------------------------------------------------------------------------------------------------------------------------------------------------------------------------|--------------------|
| Title and abstract        | 1      | (a) Indicate the study's design with a commonly used term in the title or the abstract                                                                                                                                                                                                                                                                                                                                                                                 | 1                  |
|                           |        | (b) Provide in the abstract an informative and balanced summary of what was done and what was found                                                                                                                                                                                                                                                                                                                                                                    | 1                  |
| <b>Introduction</b>       |        |                                                                                                                                                                                                                                                                                                                                                                                                                                                                        |                    |
| Background/rationale      | 2      | Explain the scientific background and rationale for the investigation being reported                                                                                                                                                                                                                                                                                                                                                                                   | 2                  |
| Objectives                | 3      | State specific objectives, including any pre-specified hypotheses                                                                                                                                                                                                                                                                                                                                                                                                      | 3                  |
| <b>Methods</b>            |        |                                                                                                                                                                                                                                                                                                                                                                                                                                                                        |                    |
| Study design              | 4      | Present key elements of study design early in the paper                                                                                                                                                                                                                                                                                                                                                                                                                | 4                  |
| Setting                   | 5      | Describe the setting, locations, and relevant dates, including periods of recruitment, exposure, follow-up, and data collection                                                                                                                                                                                                                                                                                                                                        | 3-4, Figure 1      |
| Participants              | 6      | (a) <i>Cohort study</i> —Give the eligibility criteria, and the sources and methods of selection of participants. Describe methods of follow-up<br><i>Case-control study</i> —Give the eligibility criteria, and the sources and methods of case ascertainment and control selection. Give the rationale for the choice of cases and controls<br><i>Cross-sectional study</i> —Give the eligibility criteria, and the sources and methods of selection of participants | 5                  |
|                           |        | (b) <i>Cohort study</i> —For matched studies, give matching criteria and number of exposed and unexposed<br><i>Case-control study</i> —For matched studies, give matching criteria and the number of controls per case                                                                                                                                                                                                                                                 | 5                  |
| Variables                 | 7      | Clearly define all outcomes, exposures, predictors, potential confounders, and effect modifiers. Give diagnostic criteria, if applicable                                                                                                                                                                                                                                                                                                                               | 5-8                |
| Data sources/ measurement | 8*     | For each variable of interest, give sources of data and details of methods of assessment (measurement). Describe comparability of assessment methods if there is more than one group                                                                                                                                                                                                                                                                                   | 6-8                |
| Bias                      | 9      | Describe any efforts to address potential sources of bias                                                                                                                                                                                                                                                                                                                                                                                                              | 6                  |
| Study size                | 10     | Explain how the study size was arrived at                                                                                                                                                                                                                                                                                                                                                                                                                              | 6, Figure 1        |
| Quantitative variables    | 11     | Explain how quantitative variables were handled in the analyses. If applicable, describe which groupings were chosen and why                                                                                                                                                                                                                                                                                                                                           | 8                  |
| Statistical methods       | 12     | (a) Describe all statistical methods, including those used to control for confounding                                                                                                                                                                                                                                                                                                                                                                                  | 8-9                |
|                           |        | (b) Describe any methods used to examine subgroups and interactions                                                                                                                                                                                                                                                                                                                                                                                                    | 8                  |
|                           |        | (c) Explain how missing data were addressed                                                                                                                                                                                                                                                                                                                                                                                                                            | 6                  |
|                           |        | (d) <i>Cohort study</i> —If applicable, explain how loss to follow-up was addressed<br><i>Case-control study</i> —If applicable, explain how matching of cases and controls was addressed                                                                                                                                                                                                                                                                              | 6                  |

|                          |     |                                                                                                                                                                                                              |                               |
|--------------------------|-----|--------------------------------------------------------------------------------------------------------------------------------------------------------------------------------------------------------------|-------------------------------|
|                          |     | <i>Cross-sectional study</i> —If applicable, describe analytical methods taking account of sampling strategy                                                                                                 |                               |
|                          |     | (e) Describe any sensitivity analyses                                                                                                                                                                        |                               |
| <b>Results</b>           |     |                                                                                                                                                                                                              |                               |
| Participants             | 13* | (a) Report numbers of individuals at each stage of study—eg numbers potentially eligible, examined for eligibility, confirmed eligible, included in the study, completing follow-up, and analysed            | Figure 1                      |
|                          |     | (b) Give reasons for non-participation at each stage                                                                                                                                                         | 6                             |
|                          |     | (c) Consider use of a flow diagram                                                                                                                                                                           | Figure 1                      |
| Descriptive data         | 14* | (a) Give characteristics of study participants (eg demographic, clinical, social) and information on exposures and potential confounders                                                                     | Table 1                       |
|                          |     | (b) Indicate number of participants with missing data for each variable of interest                                                                                                                          | Table 1, Supplemental Table 1 |
|                          |     | (c) <i>Cohort study</i> —Summarise follow-up time (eg, average and total amount)                                                                                                                             | 5                             |
| Outcome data             | 15* | <i>Cohort study</i> —Report numbers of outcome events or summary measures over time                                                                                                                          | 8                             |
|                          |     | <i>Case-control study</i> —Report numbers in each exposure category, or summary measures of exposure                                                                                                         |                               |
|                          |     | <i>Cross-sectional study</i> —Report numbers of outcome events or summary measures                                                                                                                           |                               |
| Main results             | 16  | (a) Give unadjusted estimates and, if applicable, confounder-adjusted estimates and their precision (eg, 95% confidence interval). Make clear which confounders were adjusted for and why they were included | Table 3                       |
|                          |     | (b) Report category boundaries when continuous variables were categorized                                                                                                                                    | 8                             |
|                          |     | (c) If relevant, consider translating estimates of relative risk into absolute risk for a meaningful time period                                                                                             |                               |
| Other analyses           | 17  | Report other analyses done—eg analyses of subgroups and interactions, and sensitivity analyses                                                                                                               |                               |
| <b>Discussion</b>        |     |                                                                                                                                                                                                              |                               |
| Key results              | 18  | Summarise key results with reference to study objectives                                                                                                                                                     | 11                            |
| Limitations              | 19  | Discuss limitations of the study, taking into account sources of potential bias or imprecision. Discuss both direction and magnitude of any potential bias                                                   | 11                            |
| Interpretation           | 20  | Give a cautious overall interpretation of results considering objectives, limitations, multiplicity of analyses, results from similar studies, and other relevant evidence                                   | 11-12                         |
| Generalisability         | 21  | Discuss the generalisability (external validity) of the study results                                                                                                                                        | 13                            |
| <b>Other information</b> |     |                                                                                                                                                                                                              |                               |
| Funding                  | 22  | Give the source of funding and the role of the funders for the present study and, if applicable, for the original study on which the present article is based                                                | 15                            |

\*Give information separately for cases and controls in case-control studies and, if applicable, for exposed and unexposed groups in cohort and cross-sectional studies.

1  
2  
3  
4  
5  
6  
7  
8  
9  
10  
11  
12  
13  
14  
15  
16  
17  
18  
19  
20  
21  
22  
23  
24  
25  
26  
27  
28  
29  
30  
31  
32  
33  
34  
35  
36  
37  
38  
39  
40  
41  
42  
43  
44  
45  
46  
47  
48  
49

**Note:** An Explanation and Elaboration article discusses each checklist item and gives methodological background and published examples of transparent reporting. The STROBE checklist is best used in conjunction with this article (freely available on the Web sites of PLoS Medicine at <http://www.plosmedicine.org/>, Annals of Internal Medicine at <http://www.annals.org/>, and Epidemiology at <http://www.epidem.com/>). Information on the STROBE Initiative is available at [www.strobe-statement.org](http://www.strobe-statement.org).

For peer review only
