# Supplementary material for: Infant BMI peak as a predictor of overweight and obesity at age 2 years in a Chinese community-based cohort
Source: PubMed Central journal article supplement — BMJ Open. 2017 Oct 6;7(10):e015122. doi: 10.1136/bmjopen-2016-015122 (PMC5640041; doi:10.1136/bmjopen-2016-015122), 2017-10-06
Supplement: bmjopen-2016-015122supp001.pdf [file bmjopen-2016-015122supp001.pdf]

**Supplemental Table 1 Characteristics of the analytic and excluded healthy singleton infants**

| Characteristics                                | n           | Included, n (%)                | Excluded, n (%)    |
|------------------------------------------------|-------------|--------------------------------|--------------------|
| Total number                                   | 7074        | 2268(32.1)                     | 4806(67.9)         |
| Gender                                         |             |                                |                    |
| Male                                           | 3468        | 1126 (49.6)                    | 2342 (48.7)        |
| Female                                         | 3606        | 1142(50.4)                     | 2464 (51.3)        |
| Birth weight                                   |             |                                |                    |
| <4.0kg                                         | 6609        | 2108(92.9)                     | 4501 (93.7)        |
| ≥4kg                                           | 465         | 160 (7.1)                      | 305(6.3)           |
| Maternal Age                                   |             |                                |                    |
| >35y                                           | 570         | 176 (7.8)                      | 394 (8.2)          |
| ≤35y                                           | 6504        | 2092(92.2)                     | 4412(91.8)         |
| Total number with data at age 2y               | <b>1949</b> | <b>1949 (85.9)<sup>a</sup></b> | <b>2282 (47.4)</b> |
| Total number of overweight and obese at age 2y | 751         | 330 (16.9)                     | 421 (18.4)         |
| Total number of obese at age 2y                | 99          | 44 (2.3)                       | 55(2.4)            |

a.P<0.05

Chi-square tests were used to examine the differences between included or excluded group.

**Supplemental Table 2: Correlation matrix of infancy BMI characteristics**

|                              | Age of BMI Peak, mo | Pre-peak velocities, kg/m2/mo |
|------------------------------|---------------------|-------------------------------|
| Magnitude of BMI peak, kg/m2 | 0.03                | 0.654**                       |
| Age of BMI Peak, mo          |                     | 0.09**                        |

Significance is noted as: \*\*  $p \leq 0.01$ .

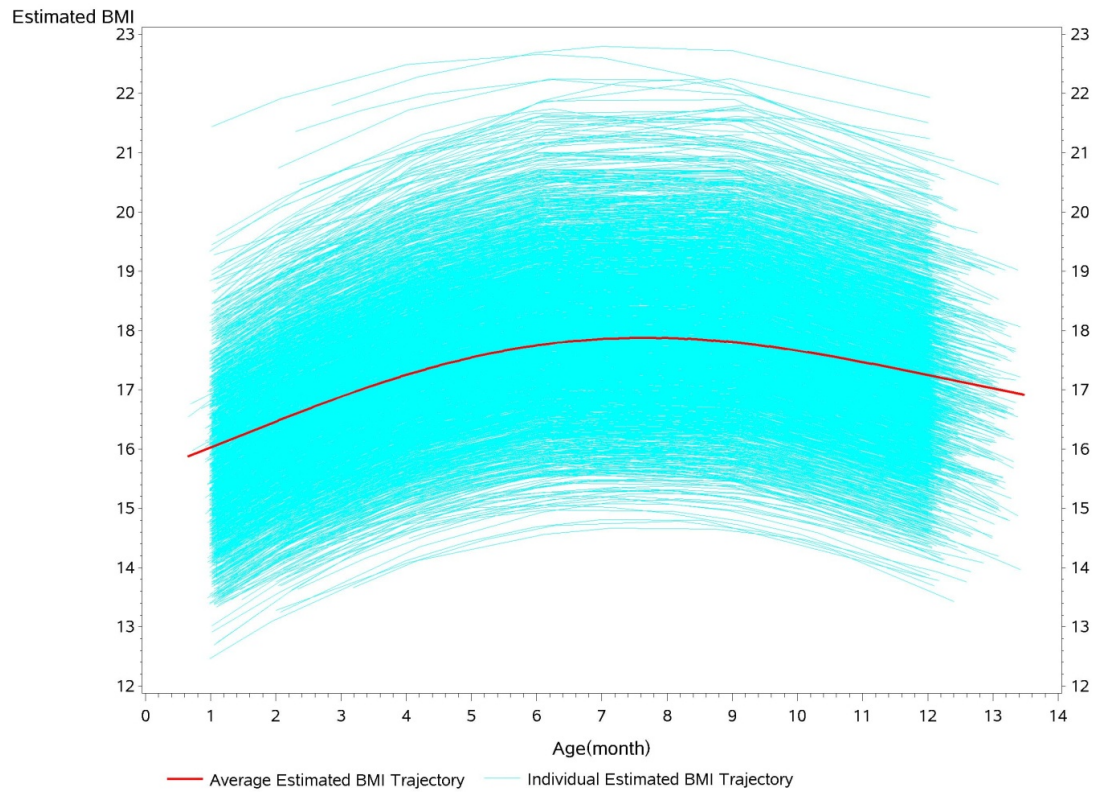

**Supplemental Figure1 Infant Estimated BMI trajectory by polynomial regression model**
